# Supplementary material for: Detection of Treatment-Induced Changes in Signaling Pathways in Gastrointestinal Stromal Tumors Using Transcriptomic Data
Source: Oxford University Press journal article supplement (doi:10.1158/0008-5472.can-09-1709), 2009-11-10
Supplement: 00085472can091709-sup-file_2-preprocessed_cell_line_data.xls [file 00085472can091709-sup-file_2-preprocessed_cell_line_data.xls]

## Sheet: Mean Values
UniGene	IM00	IM02	IM04	IM06	IM09	IM12	IM18	IM24	IM48
Hs.101174	1.03204	1.06656	1.05241	1.03921	1.03278	1.07555	1.11735	1.07433	1.2154
Hs.1012	0.362699	0.368735	0.345241	0.359224	0.292443	0.332987	0.319347	0.280285	0.33808
Hs.1019	0.994721	0.952346	0.876638	0.91861	0.993609	0.982661	1.15241	1.27174	1.72592
Hs.101937	4.55257	5.71416	6.24094	6.431	5.92802	7.33011	10.0612	4.24466	7.76502
Hs.102484	1.06075	1.04401	0.932275	1.02412	0.923524	0.984304	0.910499	1.02508	0.991394
Hs.103110	1.07174	1.10341	1.07276	1.12964	1.17662	1.22375	1.2628	1.30654	1.10205
Hs.103183	0.678375	0.683645	0.827999	0.793004	0.887262	0.709183	0.726939	0.775929	0.737063
Hs.104119	0.660869	0.703773	0.747609	0.78009	0.779397	0.871125	0.942246	0.863712	0.730262
Hs.104134	1.24472	1.28765	1.14727	1.19019	1.15289	1.32985	1.30685	1.23641	1.21913
Hs.104741	0.54458	0.579976	0.708101	0.682107	0.70087	0.652736	0.529534	0.469939	0.282116
Hs.1051	1.00127	0.9872	0.958416	0.949584	0.954838	1.04851	1.04154	0.946348	1.25525
Hs.105407	0.683365	0.802634	0.82352	0.80915	0.725929	0.786288	0.752011	0.64171	0.758901
Hs.106070	1.00174	0.991181	1.02774	1.15812	1.48095	2.16352	2.73671	2.27168	1.75374
Hs.1074	1.07664	1.05175	0.981273	0.987973	1.00706	1.08554	1.09892	1.03738	1.08128
Hs.1076	1.16392	1.1445	1.1889	1.2003	1.19576	1.20489	1.1486	1.07201	1.11067
Hs.108408	0.809616	0.82045	0.808621	0.761076	0.789353	0.893325	0.94476	0.77371	0.75739
Hs.109225	0.730404	0.81192	0.781962	0.780876	0.750974	0.680012	0.645913	0.678316	0.5794
Hs.109620	1.01936	1.13443	1.04846	1.03349	0.989518	1.03502	1.0583	0.98591	0.989527
Hs.110014	1.09738	1.16335	1.1336	1.05799	1.10096	1.10147	1.06762	1.1749	1.06575
Hs.110571	1.44212	1.19834	1.234	1.43068	1.42845	1.58916	1.86292	1.62154	1.81238
Hs.111779	0.541217	0.546057	0.564182	0.586854	0.578741	0.71357	0.86491	0.792994	0.561105
Hs.112405	0.923524	0.951407	0.91643	0.88182	0.934165	0.947889	0.96864	0.941167	0.948565
Hs.112432	0.77197	0.819428	0.792223	0.775099	0.722996	0.884496	0.788677	0.71377	0.885257
Hs.113577	0.580152	0.589835	0.725939	0.672778	0.764987	0.640919	0.702978	0.698161	0.716036
Hs.113916	1.11963	1.12428	1.12263	1.10914	1.10753	1.13856	1.13002	1.13864	1.12458
Hs.115242	1.29201	1.26055	1.12453	1.05405	1.02138	1.06246	0.966673	0.90784	0.971921
Hs.115617	0.67804	0.66817	0.645117	0.629399	0.617501	0.635325	0.58059	0.627298	0.604873
Hs.116462	1.00259	1.00607	0.990894	1.02202	0.988288	0.988312	0.989513	0.977595	0.98543
Hs.1166	0.943099	0.928628	0.909645	0.917942	0.995261	0.992863	0.943112	0.921212	0.872027
Hs.117050	1.04429	1.07796	1.04074	0.963118	1.04223	1.05866	1.03686	1.03493	1.05021
Hs.117367	1.17829	1.37139	1.42103	1.45003	1.35921	1.36934	1.53183	1.12684	1.42634
Hs.118651	1.314	0.640616	0.44339	0.482673	0.427606	0.333974	0.310841	0.299591	0.287242
Hs.118681	0.699886	0.705001	0.713184	0.751133	0.757164	0.802076	0.816116	0.711156	0.726456
Hs.119689	0.464622	0.473036	0.460714	0.489722	0.439203	0.434953	0.436571	0.433655	0.427881
Hs.119825	0.26767	0.273033	0.233034	0.26632	0.226403	0.22184	0.237926	0.237416	0.22941
Hs.119882	0.0482179	0.0512386	0.0499933	0.0502847	0.044197	0.0502205	0.0507138	0.0514462	0.053324
Hs.120759	0.134118	0.138427	0.131995	0.136624	0.130469	0.139875	0.133766	0.130426	0.138628
Hs.120949	1.0209	1.02692	1.06789	1.06445	1.12489	1.02398	1.06796	1.08515	1.0262
Hs.1211	0.182013	0.195798	0.190631	0.207629	0.147827	0.190318	0.174595	0.154899	0.188471
Hs.121575	0.80263	0.835956	0.785695	0.788953	0.762857	0.780272	0.811672	0.796146	0.801285
Hs.122523	1.02229	1.05534	1.04361	1.04483	0.998087	1.08543	1.1749	1.10185	1.00253
Hs.122926	0.480185	0.435818	0.678161	0.702371	0.8267	0.80127	0.868887	0.940366	0.952499
Hs.12341	0.943613	0.962897	0.948939	0.954677	0.925077	0.929581	0.953629	1.02896	1.1558
Hs.1239	0.72556	0.739854	0.713859	0.750034	0.727408	0.744676	0.748459	0.686424	0.727389
Hs.12409	0.945894	0.958864	0.978379	0.918014	0.995771	0.936921	0.990572	0.984171	0.977802
Hs.124161	0.158407	0.148044	0.123776	0.139912	0.138262	0.172542	0.192631	0.27514	0.196026
Hs.12420	1.0917	1.10994	1.20421	1.17042	1.16125	1.31151	1.15839	1.21525	1.17334
Hs.124503	0.935636	0.751921	0.889949	0.809166	0.967463	0.843547	0.807195	0.832582	0.875337
Hs.125113	0.751884	0.766953	0.738728	0.752571	0.695458	0.68992	0.637486	0.744865	0.704693
Hs.125180	3.44698	3.84346	5.78193	5.54386	7.06827	4.91936	5.84836	8.61089	8.71044
Hs.125898	0.872593	0.884633	0.825262	0.824338	0.801073	0.918696	0.881954	0.921383	0.877838
Hs.126256	1.00197	1.03142	1.02263	1.01086	0.963712	0.947549	0.943967	0.914427	0.926528
Hs.1270	0.954815	0.8817	0.803815	0.869409	0.857429	0.866938	0.860587	0.909021	0.826259
Hs.128433	1.12987	1.17019	1.09816	1.04373	1.09273	1.03351	1.0295	1.11573	1.0402
Hs.1288	0.512588	0.380095	0.488514	0.497546	0.429798	0.486113	0.44015	0.430602	0.476763
Hs.12907	1.15581	1.0576	1.04642	1.08534	1.09307	1.0225	1.12362	1.17982	1.50724
Hs.129614	0.858377	0.910508	0.871595	0.872091	0.885538	0.866844	0.878725	0.969717	0.895736
Hs.129706	2.52854	2.42817	2.08594	2.11271	2.62143	2.67787	3.05407	3.546	2.63068
Hs.129829	1.09662	1.06812	0.978106	0.987978	0.975279	1.06242	0.973712	1.13422	1.0132
Hs.129966	4.461	4.81291	4.44252	4.61818	5.23264	6.04039	7.23103	7.5653	7.58011
Hs.1309	0.571941	0.583607	0.543616	0.576989	0.502351	0.519076	0.507798	0.474618	0.50965
Hs.131255	0.488997	0.565128	0.632873	0.621026	0.640829	0.612387	0.647158	0.630084	0.608688
Hs.131342	0.756461	0.725668	0.69211	0.736236	0.69844	0.718745	0.677203	0.662182	0.693036
Hs.131704	0.81066	0.838014	0.855536	0.911376	0.941012	0.97697	0.981597	1.02772	1.03466
Hs.131956	0.364823	0.377867	0.355141	0.381394	0.321093	0.376487	0.342227	0.323769	0.350485
Hs.1321	0.267338	0.257844	0.248181	0.257256	0.194961	0.231371	0.243731	0.179445	0.244516
Hs.13291	1.1504	1.94835	3.5542	3.99598	4.44046	3.35771	3.61579	3.99761	2.94218
Hs.132966	0.179083	0.182443	0.174393	0.180847	0.160203	0.163601	0.157689	0.161274	0.165607
Hs.132992	0.518684	0.490719	0.471954	0.504855	0.435186	0.493399	0.446889	0.492912	0.462999
Hs.133135	0.765884	0.919812	0.851849	0.916708	0.829584	1.09761	1.07628	1.05159	1.21689
Hs.133379	0.911254	0.856465	0.887028	0.931526	0.85131	0.888644	0.886059	0.910968	0.827274
Hs.133892	1.09742	1.1524	1.12785	1.21147	1.1136	0.986662	0.958754	0.921171	0.966464
Hs.134084	1.73489	1.65883	1.50819	1.50705	1.38517	1.44188	1.31694	1.30251	1.56537
Hs.134194	1.10058	1.17745	1.17552	1.11723	1.11226	1.13774	1.14699	1.18799	1.20445
Hs.1349	1.00262	0.935751	0.925783	0.937047	0.954467	0.913821	0.944231	0.903774	0.979914
Hs.134989	0.575049	0.532714	0.337308	0.358688	0.365369	0.448978	0.406514	0.658982	0.497326
Hs.134999	0.444565	0.441995	0.395789	0.384017	0.364364	0.419147	0.420844	0.379612	0.344916
Hs.135270	0.847608	0.844186	0.783337	0.80118	0.791795	0.837514	0.807999	0.810312	0.881992
Hs.135406	0.779719	0.692927	0.656251	0.618115	0.672205	0.644665	0.59253	0.693385	0.74156
Hs.1360	0.740803	0.720694	0.691364	0.683646	0.754711	0.72006	0.716093	0.840898	0.740293
Hs.1361	1.10569	1.13708	1.04604	1.11702	1.13547	1.20164	1.179	1.0854	1.16124
Hs.136295	0.987328	0.992899	0.966511	0.973597	0.920837	0.933529	0.947418	0.937446	0.889864
Hs.136348	3.34287	3.55192	5.36298	6.02324	7.45699	7.8606	8.18697	10.1829	4.91483
Hs.136557	1.1541	1.21754	1.12254	1.03814	1.11958	1.14538	1.18697	1.07567	1.12537
Hs.137569	0.997684	1.02062	1.0147	1.01585	0.953556	0.964032	0.978545	0.997225	0.983156
Hs.139322	1.01476	1.04144	0.962552	0.928036	1.07496	1.07669	1.12705	0.985211	1.09086
Hs.1395	1.88237	0.944458	0.827285	0.866285	0.838227	0.904868	0.874278	1.05869	1.65725
Hs.141125	1.02617	0.989976	1.20372	1.26546	1.40106	1.28763	1.2877	1.5316	1.43651
Hs.1420	0.47734	0.467819	0.434281	0.454792	0.425002	0.458691	0.426871	0.395438	0.440109
Hs.1428	1.11488	1.19713	1.15365	1.0994	1.15581	1.13802	1.1197	1.15204	1.11072
Hs.1430	1.08143	1.28083	1.20836	1.2812	1.32319	1.33654	1.2643	1.34804	1.0224
Hs.1437	0.364759	0.362249	0.349963	0.414719	0.385096	0.513233	0.765508	0.874278	1.31045
Hs.143873	0.0534218	0.0638716	0.0474371	0.0511936	0.0408212	0.0401438	0.0398632	0.0417928	0.03709
Hs.144287	0.720465	0.762987	0.728363	0.731203	0.692283	0.710262	0.690573	0.687719	0.698484
Hs.1454	1.03271	1.09273	1.07526	0.961013	1.01884	1.05199	1.00138	1.07494	1.10329
Hs.146591	0.65229	0.671982	0.639095	0.663011	0.607814	0.606456	0.605869	0.58992	0.650312
Hs.1466	0.793578	0.810598	0.792777	0.782275	0.828006	0.814864	0.711817	0.74703	0.649304
Hs.146804	1.16173	1.29131	1.6395	1.53858	1.86964	1.39272	1.5663	1.66298	1.72602
Hs.147433	0.491128	0.56939	0.727219	0.748785	0.7305	0.649795	0.501857	0.421949	0.456655
Hs.148427	1.12571	1.0935	1.07388	1.07986	1.06982	1.08139	1.03946	1.07917	1.04802
Hs.14846	1.27812	1.07847	0.875569	0.831887	0.760233	0.725343	0.694131	0.626452	0.889593
Hs.148841	1.16908	1.29463	1.17619	1.09608	1.09998	1.07842	1.12397	1.21916	1.097
Hs.149195	1.17403	1.10178	1.1644	1.10153	1.16234	1.10044	1.12879	1.16225	1.08963
Hs.149252	0.137993	0.141731	0.132738	0.142948	0.116974	0.138767	0.129692	0.120759	0.137594
Hs.149342	1.14844	1.07596	1.08999	1.19787	1.10923	1.09955	1.04149	1.05114	1.01366
Hs.1497	0.825848	0.833402	0.77944	0.772124	0.813301	0.800613	0.78363	0.775426	0.787818
Hs.149894	0.721929	0.787161	0.914406	0.87743	0.926648	0.933692	0.909716	1.25335	0.882125
Hs.150136	1.35002	1.22215	1.18842	1.22429	1.29138	1.31345	1.36791	1.06657	1.16147
Hs.150749	0.708774	0.81724	0.842547	0.761569	0.731128	0.738009	0.822508	1.05401	1.43378
Hs.150793	1.24641	1.26845	1.027	1.20724	1.13113	1.31696	1.25136	1.35649	1.38441
Hs.151573	1.77577	1.77946	1.29769	1.22588	1.09558	0.828854	0.638471	0.755135	0.88792
Hs.15159	1.20232	1.1831	1.1039	1.01676	1.00606	1.06927	1.0272	1.03698	0.927374
Hs.151777	0.580713	0.551862	0.56972	0.512123	0.493669	0.435394	0.431608	0.433686	0.473705
Hs.152292	1.75316	1.68848	2.6499	2.22205	2.89596	2.4225	3.05221	3.99202	3.31084
Hs.152531	2.22916	2.2267	2.23374	2.5263	3.28567	3.78581	4.02841	4.03852	4.65753
Hs.153322	0.608125	0.674275	0.684773	0.717432	0.768352	0.748693	0.687974	0.690439	0.822606
Hs.154276	0.644194	0.639898	0.731733	0.697083	0.752437	0.717372	0.73099	0.7165	0.749766
Hs.154495	1.12519	1.06472	1.05117	1.11288	1.10336	1.15782	1.15239	1.08795	1.11702
Hs.154654	0.380925	0.339531	0.385754	0.330499	0.450129	0.381139	0.373442	0.338286	0.268347
Hs.154704	1.17225	1.15584	1.12721	1.05313	1.10657	1.21788	1.40582	1.19876	1.40974
Hs.155247	0.513491	0.514953	0.484819	0.499269	0.488403	0.503735	0.5308	0.49171	0.490817
Hs.155591	35.0041	21.5737	22.6358	28.7371	36.7129	38.0091	44.3874	47.7616	51.2731
Hs.155597	0.285783	0.299561	0.249652	0.276615	0.26122	0.377857	0.451919	0.432135	0.293869
Hs.155644	1.05931	1.08433	1.05308	1.00553	1.06192	1.06383	1.05828	1.10172	1.01976
Hs.155651	0.598095	0.64685	0.620404	0.627328	0.575309	0.652636	0.651103	0.534414	0.62165
Hs.156289	1.06536	1.0891	1.07962	1.06235	1.07596	1.03857	1.19798	1.0774	1.06354
Hs.1573	0.998556	1.17445	1.27088	1.29941	1.11786	1.16244	1.13069	0.985578	1.06422
Hs.157429	0.434341	0.419311	0.408163	0.413836	0.425732	0.428805	0.429956	0.453928	0.437837
Hs.157872	1.07574	1.06283	1.02958	1.08245	1.07688	1.06058	1.05632	1.05142	1.04825
Hs.158195	0.639869	0.60003	0.821134	0.80375	0.804829	0.695834	0.664905	0.764369	0.760734
Hs.158300	1.09614	1.09831	1.08274	1.10023	1.08346	1.12352	1.07038	1.07177	1.08532
Hs.1584	0.925552	0.949401	0.956296	0.948839	0.976048	1.05573	1.1905	1.09785	1.13417
Hs.158932	0.977853	0.966447	1.0257	0.982902	0.993344	0.957152	0.985898	0.946692	1.03031
Hs.159223	1.1066	0.626108	0.602703	0.668605	0.653141	0.68001	0.766588	0.62066	0.7577
Hs.159297	1.04625	1.12959	1.24418	1.12464	1.23195	1.15685	1.11438	1.17724	1.07977
Hs.159448	1.64494	1.57884	1.01991	0.986494	0.933804	1.23943	1.09061	1.24629	1.26626
Hs.159628	0.756139	0.788224	0.794622	0.772157	0.714424	0.757219	0.709465	0.698559	0.749165
Hs.1600	0.728261	0.759435	0.816249	0.696824	0.667408	0.535361	0.525569	0.561666	0.680194
Hs.160411	1.03658	0.949833	0.936912	0.987483	0.990476	0.937832	0.971937	0.96266	0.977758
Hs.160556	1.06962	1.00589	0.921497	0.870288	0.8542	0.850476	0.832467	0.779028	0.789366
Hs.160562	0.883385	0.876867	0.847057	0.854691	0.844642	0.884724	0.868705	0.854418	0.860324
Hs.160786	0.180725	0.190568	0.176831	0.187732	0.179674	0.224518	0.27291	0.245745	0.206024
Hs.160871	1.13925	1.07227	1.10097	1.12001	1.03592	1.03179	1.01524	1.10143	1.0521
Hs.160953	1.51377	1.54669	1.35048	1.46052	1.29742	1.38089	1.32425	1.71103	1.47703
Hs.162646	0.3774	0.41966	0.366252	0.372222	0.312767	0.404938	0.375367	0.359798	0.442394
Hs.162757	1.88092	1.78602	1.75531	1.87912	2.03469	2.22416	2.59853	2.05405	1.88326
Hs.162807	0.0429848	0.039942	0.0413135	0.0423235	0.0430519	0.0472827	0.0531409	0.0526321	0.0540216
Hs.163484	0.200288	0.214034	0.196599	0.210535	0.167819	0.186843	0.166625	0.181367	0.185643
Hs.163867	1.2559	1.39314	1.25896	1.31524	1.23209	1.55533	1.45121	1.36364	1.52089
Hs.164060	0.503061	0.490048	0.382713	0.341371	0.329139	0.370521	0.379805	0.385988	0.539399
Hs.164226	6.88674	6.08992	5.82242	5.49355	5.95562	4.27932	4.70078	4.73136	4.38413
Hs.1644	1.22556	1.19979	1.13664	1.13852	1.19069	1.1804	1.14744	1.21923	1.15231
Hs.165950	0.398868	0.408327	0.387489	0.394713	0.372796	0.386279	0.403569	0.344074	0.370241
Hs.166017	0.719169	0.728653	0.83998	0.806448	0.842224	0.746652	0.77198	0.802039	0.758172
Hs.166120	1.03013	0.997952	1.21116	1.2709	1.31938	1.20569	1.4581	1.22297	1.29385
Hs.167017	1.18291	1.2013	1.16507	1.18074	1.14592	1.1936	1.15706	1.20853	1.36423
Hs.167584	0.927777	0.970754	0.936718	0.937627	0.839969	0.913619	0.869312	0.961621	0.915644
Hs.169002	1.11755	1.03696	1.00783	1.05382	1.07327	1.03015	1.03681	0.998603	0.96913
Hs.169246	0.0945831	0.0993764	0.0923098	0.0978791	0.0826586	0.0958162	0.0979202	0.0877606	0.0994601
Hs.169249	1.04809	1.07443	1.02172	1.04578	1.07779	1.09086	1.1096	1.03594	1.10028
Hs.170009	0.944322	0.863947	0.849745	0.817376	0.772069	0.814399	0.833448	0.780545	0.792494
Hs.170355	5.66913	6.91629	9.64888	9.25733	10.4888	9.57791	10.0524	13.4121	12.1989
Hs.171695	0.946288	0.801209	0.719893	0.756536	0.682812	0.747049	0.800796	0.786905	0.848483
Hs.171995	1.04074	1.1151	1.08974	1.03211	1.08238	1.0802	1.09829	1.10229	1.09601
Hs.1722	0.969632	1.00032	0.953368	0.944468	0.927059	0.948598	0.926733	0.966675	0.954314
Hs.172550	1.29173	1.13911	1.18929	1.17686	1.05365	0.942892	0.791512	0.699511	0.753625
Hs.172631	2.07573	1.89309	1.99801	2.00627	1.96458	2.09671	2.58478	2.0013	3.23166
Hs.1735	0.816033	0.776086	0.667735	0.727458	0.869321	0.896641	0.82894	0.7615	0.800898
Hs.173724	0.258996	0.269242	0.246235	0.266923	0.268135	0.460271	0.602194	0.551531	0.436446
Hs.174050	2.63512	2.53865	2.12477	2.15793	1.93079	2.36547	2.45332	2.59151	2.51506
Hs.174249	1.10112	1.07849	0.951953	1.01198	0.968049	1.01873	1.09837	1.08547	1.0475
Hs.17441	5.66268	5.81166	4.89951	5.27388	6.15278	7.06769	7.06203	7.7715	6.14089
Hs.1755	1.93872	1.63305	1.77587	1.8822	2.17003	2.04679	2.12548	2.13186	2.37669
Hs.177841	0.389638	0.39501	0.31929	0.34452	0.302306	0.320522	0.28858	0.310744	0.275291
Hs.178023	1.15734	1.05266	1.05799	1.07521	1.11616	1.05249	1.09623	1.07421	1.08357
Hs.178098	0.973669	1.04149	1.0709	0.980744	1.04792	1.03949	1.02543	1.03672	1.03333
Hs.1787	0.344515	0.315339	0.287879	0.34705	0.276841	0.322667	0.28691	0.266292	0.306326
Hs.17908	0.625907	0.675958	0.630696	0.616531	0.592814	0.611537	0.529606	0.387619	0.488339
Hs.179718	0.486856	0.454028	0.493193	0.485583	0.441243	0.428754	0.437119	0.317133	0.361957
Hs.1799	0.566384	0.55578	0.537353	0.550485	0.525093	0.573823	0.533058	0.48732	0.531493
Hs.179986	0.729372	0.709546	0.718277	0.670458	0.658563	0.682898	0.819277	0.62393	0.716728
Hs.180878	0.263697	0.261472	0.226561	0.256196	0.247024	0.230561	0.236729	0.211981	0.241323
Hs.180919	0.0932399	0.0916375	0.0934738	0.10616	0.0985194	0.0985619	0.0921921	0.0973994	0.0925439
Hs.18160	1.13286	1.14455	1.16019	1.13237	1.08399	1.1059	1.0945	1.11237	1.06217
Hs.181768	0.950251	0.877562	0.660104	0.645146	0.744471	0.809002	0.714895	0.97053	0.774388
Hs.183109	0.702147	0.765826	0.761248	0.812186	0.763243	0.747717	0.773966	0.667463	0.729683
Hs.1832	0.872939	0.870911	0.844457	0.840995	0.784244	0.827534	0.817469	0.757776	0.855589
Hs.184085	0.890901	1.09564	1.00815	1.05646	0.866418	1.10784	1.0844	0.846247	1.06732
Hs.184926	1.09555	1.17796	1.12399	1.15759	1.15914	1.20301	1.12961	1.1087	1.13484
Hs.184927	1.12023	1.14928	1.10287	1.0534	1.07753	1.07845	1.08802	1.1447	1.0943
Hs.184945	1.05882	0.932898	0.959443	0.960897	1.00119	0.938262	0.977223	0.877462	0.876218
Hs.18676	13.4321	8.7364	7.06937	8.01904	7.06616	6.54196	6.35268	7.13288	8.49033
Hs.1872	0.665772	0.668667	0.641413	0.669996	0.60795	0.647829	0.640618	0.645679	0.652721
Hs.187338	0.807205	0.816897	0.826331	0.803539	0.815288	0.846445	0.846984	0.887557	0.842938
Hs.187946	1.15722	1.02123	0.831119	0.7962	0.686015	0.68166	0.520693	0.415503	0.62501
Hs.1892	0.721939	0.746613	0.71551	0.724637	0.734739	0.796734	0.747774	0.588159	0.773688
Hs.1897	0.861564	0.938872	0.856753	0.873986	0.844068	0.881991	0.838101	0.845283	0.865162
Hs.189772	0.491638	0.540246	0.466816	0.37089	0.357712	0.301179	0.312458	0.372139	0.511981
Hs.190495	0.438626	0.435458	0.421863	0.430863	0.441672	0.423717	0.420134	0.410276	0.423218
Hs.1905	1.06064	1.0989	1.09162	1.08752	1.07481	1.0836	1.09947	1.17067	1.07113
Hs.191911	5.46807	5.34184	7.96044	8.20547	10.7095	8.41286	10.0938	10.5651	11.6653
Hs.19192	2.47088	2.33718	2.20437	2.03655	2.12087	2.25783	1.98663	1.53709	1.73114
Hs.193717	1.13922	1.16124	1.13163	1.13746	1.15544	1.14115	1.14845	1.12695	1.15123
Hs.19383	0.0498361	0.0526586	0.0505974	0.0563771	0.0502676	0.0635956	0.0729188	0.0637803	0.0757445
Hs.194143	0.340578	0.365926	0.441911	0.455199	0.481512	0.455321	0.430512	0.390448	0.36965
Hs.194236	0.991196	0.988402	1.00949	0.98857	0.986483	1.02309	0.999828	1.00171	0.997015
Hs.194333	1.24094	1.28279	1.17722	1.17399	1.055	1.1346	0.934824	0.877315	0.817957
Hs.194695	1.27569	1.29878	1.316	1.25046	1.39228	1.32792	1.29524	1.37734	1.25758
Hs.194783	1.07757	1.02405	1.03883	0.973297	0.960473	0.961503	0.963491	0.970436	0.981689
Hs.195040	0.867216	0.858784	0.822826	0.840149	0.808988	0.813659	0.778967	0.811024	0.834334
Hs.195659	0.879154	0.889746	0.866091	0.890561	0.821038	0.845199	0.847492	0.819298	0.851486
Hs.196384	3.15172	1.01289	1.0535	0.984577	1.05025	0.813656	0.775079	0.797029	0.823321
Hs.196952	0.131161	0.13401	0.125956	0.130276	0.108045	0.117432	0.108355	0.128415	0.137984
Hs.197029	0.696338	0.760293	0.735642	0.741088	0.637446	0.680601	0.731737	0.646125	0.758815
Hs.1976	0.846161	0.857931	0.781634	0.826702	0.787609	0.806177	0.838887	0.734397	0.83285
Hs.198998	1.38035	1.33294	1.28305	1.14941	1.33473	1.07802	0.944492	1.05548	1.20467
Hs.1992	1.03903	1.08264	1.08779	1.0343	1.14924	1.108	1.10483	1.00461	1.06631
Hs.2	1.27445	1.21405	1.24716	1.2555	1.25567	1.17998	1.15074	1.17429	1.20156
Hs.200250	1.12077	1.06671	1.04249	1.02562	0.980485	0.845391	0.808186	0.720812	0.697359
Hs.200716	2.21924	2.10859	1.89215	1.8712	1.84624	1.99205	2.02202	1.83906	2.04279
Hs.201897	0.830742	0.77989	0.689195	0.703686	0.721803	0.781368	0.664801	0.480678	0.535241
Hs.201918	0.81305	0.665716	0.834011	0.848113	0.937849	0.789515	0.887558	0.83131	1.06506
Hs.202	0.296205	0.349324	0.362382	0.372337	0.261766	0.36976	0.393862	0.223487	0.365737
Hs.202095	1.09519	1.10598	1.17323	1.11909	1.0768	1.12083	1.05047	1.13935	1.02444
Hs.202179	1.99997	1.98655	2.12821	2.25336	2.22363	1.79328	1.73335	2.23674	2.19356
Hs.2022	1.03761	1.09506	1.088	1.02268	1.05812	1.05583	1.081	1.04946	1.05501
Hs.202354	0.813468	0.906598	0.85987	0.877088	0.784557	0.910049	0.89736	0.760755	0.872264
Hs.202453	0.260528	0.264765	0.230565	0.24773	0.226308	0.257248	0.239806	0.265426	0.264043
Hs.202672	0.654056	0.652195	0.706673	0.621779	0.605075	0.624834	0.577834	0.415305	0.50279
Hs.20315	1.63214	2.1948	3.11739	3.48838	3.85071	3.27634	3.35001	4.0884	1.95018
Hs.203717	0.49899	0.555276	0.518015	0.578009	0.519859	0.651369	0.675743	0.728471	0.625484
Hs.20516	1.24565	1.14988	1.12284	1.09907	1.07696	1.02586	1.09422	1.12063	1.28331
Hs.207745	0.658128	0.691872	0.722326	0.731978	0.719655	0.694672	0.641074	0.667534	0.621759
Hs.208124	0.845117	1.11986	0.886543	0.97746	0.759194	1.10566	1.0363	1.21779	1.03808
Hs.209983	0.490151	0.539029	0.681445	0.724974	0.771988	0.902528	0.910309	0.798502	0.51341
Hs.21160	3.33938	4.01058	3.94377	3.95403	3.64722	3.25488	2.61985	2.10028	1.68588
Hs.212172	0.934828	0.962967	0.919577	0.923695	1.00865	1.04826	1.0421	0.96864	1.05077
Hs.212293	0.691871	0.663034	0.649045	0.659456	0.636164	0.637809	0.62636	0.630271	0.666108
Hs.212838	0.228954	0.284668	0.295991	0.324114	0.30043	0.326025	0.354741	0.419645	0.43053
Hs.213289	1.18429	0.770461	0.477748	0.517219	0.529956	0.62295	0.791924	0.673134	0.47931
Hs.214142	0.841302	0.850029	0.806102	0.877449	0.937945	1.105	1.20031	1.15875	1.12748
Hs.2157	0.66743	0.711464	0.686585	0.703282	0.639811	0.705525	0.775058	0.700124	0.835984
Hs.2161	1.0708	1.05794	1.04374	1.06733	1.04337	1.0524	1.05171	1.02889	1.03582
Hs.218040	0.590425	0.616462	0.581856	0.594541	0.530756	0.580884	0.548418	0.519971	0.561918
Hs.219140	0.828369	0.925825	0.806797	0.869119	0.768973	0.812552	0.80874	0.807805	0.814434
Hs.2200	1.12671	1.07084	1.07659	1.06721	1.0178	1.05632	1.05285	0.96168	1.00801
Hs.220971	0.523153	0.490037	0.481037	0.503473	0.476102	0.502152	0.521397	0.448372	0.472836
Hs.2233	1.07916	1.00545	1.03009	1.04717	1.08987	0.975671	1.01997	1.02542	1.0086
Hs.223782	0.734365	0.769431	0.711141	0.735582	0.662325	0.694031	0.648308	0.698773	0.708436
Hs.224171	0.259901	0.265945	0.263271	0.245751	0.209346	0.235257	0.252027	0.231034	0.255176
Hs.2242	1.23092	1.2697	1.31775	1.26689	1.20538	1.17891	1.15323	1.1724	1.12934
Hs.2246	1.08364	1.09481	0.995621	1.13766	1.02098	1.282	1.25468	1.14493	1.21435
Hs.224698	0.318332	0.357073	0.338046	0.339335	0.282508	0.351356	0.319645	0.288848	0.315489
Hs.2247	1.12247	1.03021	1.07122	1.17629	1.08746	1.027	1.01004	1.04332	1.06726
Hs.2250	0.834671	0.917967	0.882607	0.798006	0.805923	0.81665	0.808959	0.776789	0.761611
Hs.2256	0.972597	0.996277	1.08287	0.997636	1.07158	0.989064	0.976034	0.960138	0.959162
Hs.2257	0.980177	1.03723	1.0069	0.988522	0.907651	1.0391	0.981718	0.912011	0.965348
Hs.22584	1.00889	1.09322	1.05734	1.05177	1.02488	1.01738	1.12936	1.1021	1.05189
Hs.225936	0.976886	1.04087	0.806859	0.869789	0.815629	1.00063	0.869709	1.2495	1.00564
Hs.226780	0.833854	0.853158	1.04187	1.00989	1.08861	0.848462	0.778587	0.894886	0.8569
Hs.227253	0.839634	0.878568	1.07141	1.0795	1.18404	0.976077	0.920596	1.20035	1.0687
Hs.227777	0.724215	0.702085	0.631833	0.611143	0.649577	0.64839	0.599588	0.672596	0.639091
Hs.227817	0.980457	0.909134	0.721903	0.663119	0.646136	0.81036	0.871696	0.904441	0.899389
Hs.22867	1.9359	2.05691	1.85414	1.91251	1.9242	2.01497	2.01698	1.93009	1.98648
Hs.2303	0.708025	0.780577	0.741577	0.725876	0.692257	0.723235	0.703469	0.673558	0.715679
Hs.231367	1.11512	1.14001	1.10143	1.09587	1.1048	1.12763	1.08421	1.1221	1.09824
Hs.232375	0.394057	0.451778	0.534272	0.561698	0.548416	0.45857	0.504649	0.561111	0.566691
Hs.2324	1.04735	1.05082	1.02579	1.00893	1.10256	1.12337	1.11674	1.06139	1.07324
Hs.234249	1.03325	1.0723	1.02746	0.984602	1.01537	1.06157	1.08868	1.02142	1.0713
Hs.234898	0.940479	0.971388	0.934394	0.928479	0.964488	0.967487	0.992394	1.01508	0.944494
Hs.2353	1.1726	1.10142	1.11071	1.10869	1.13817	1.08554	1.1169	1.12772	1.07071
Hs.235368	1.16585	1.09998	1.06957	1.04548	1.08801	1.04672	1.13823	1.05638	1.01016
Hs.235935	0.440625	0.454936	0.428743	0.443388	0.39218	0.432343	0.40566	0.384212	0.433006
Hs.23650	1.03906	1.07056	0.87637	0.93426	0.927206	1.20833	1.07761	1.2739	1.07362
Hs.237658	0.0529107	0.0578669	0.0578346	0.0570776	0.0465739	0.0594623	0.0595274	0.0463555	0.0626343
Hs.238990	1.54495	2.03876	2.6457	2.76811	2.76778	2.26389	2.13903	2.33243	2.2617
Hs.23960	1.24726	1.25001	1.12583	1.17336	1.00797	1.27706	1.15128	0.893485	0.413125
Hs.2399	0.439997	0.434234	0.398317	0.432963	0.379421	0.401149	0.392382	0.350583	0.395742
Hs.241382	3.41719	4.34513	2.80895	3.55366	2.51263	4.81683	4.0545	5.8182	3.80652
Hs.241570	1.10077	1.12917	1.09242	1.10684	1.09263	1.17599	1.20631	1.10832	1.16098
Hs.244139	7.34172	6.74975	8.97624	8.91121	10.7928	8.40458	7.658	9.52822	7.05346
Hs.244723	11.3155	11.1348	8.53324	7.94517	8.54601	9.09173	8.61693	9.23852	9.11479
Hs.24529	0.663219	0.657231	0.860217	0.818055	0.812305	0.676559	0.558288	0.471398	0.421116
Hs.247565	1.20692	1.18263	1.14115	1.16497	1.19342	1.14753	1.14474	1.19329	1.17687
Hs.247787	1.14248	1.01948	0.949682	0.95212	1.02025	0.937474	0.935608	1.08027	0.966398
Hs.247940	1.09638	1.13914	1.11843	1.14376	1.10626	1.15123	1.15916	1.11956	1.12084
Hs.247979	1.07176	1.0839	1.0797	1.11115	1.07292	1.01399	1.06209	0.941263	1.12684
Hs.248101	1.04681	1.09937	1.08384	1.05137	1.05554	1.12732	1.14474	1.06789	1.03938
Hs.248112	1.01846	1.0601	1.03649	1.09092	1.0735	1.06696	1.0343	1.06538	1.09219
Hs.248141	1.06753	1.12366	1.15195	1.15025	1.17202	1.11032	1.21609	1.08746	1.345
Hs.248144	0.834366	0.855094	0.786204	0.767596	0.869142	0.876052	0.861663	0.894322	0.900346
Hs.248156	1.07442	1.10113	1.08331	1.11728	1.1578	1.16737	1.17786	1.066	1.11232
Hs.248164	1.27433	1.16382	1.20225	1.22605	1.19341	1.19997	1.1794	1.21521	1.17966
Hs.248184	0.982325	0.96446	0.991475	1.00272	0.97623	0.948035	0.990695	1.11291	0.976256
Hs.2484	1.13363	1.19222	1.12129	1.11214	1.14911	1.17046	1.14601	1.18558	1.18692
Hs.248472	0.938008	0.922265	0.926062	0.907055	0.889392	0.876047	0.908946	0.849457	0.904887
Hs.2490	1.95849	1.9659	2.08978	1.80961	1.63724	1.30213	1.43993	1.86717	1.59436
Hs.249171	3.46216	3.06926	3.54164	3.92813	3.7281	3.56742	3.73888	3.91631	3.94306
Hs.249184	0.0714861	0.0789137	0.0772487	0.0829897	0.0652853	0.0779361	0.0772665	0.0654483	0.0817057
Hs.249196	0.989527	1.04337	1.04878	1.01576	0.947578	1.02905	1.00739	0.992431	1.04173
Hs.249200	0.958882	0.954648	0.95106	0.951376	0.901107	0.928268	0.903258	0.888948	0.951985
Hs.249211	1.10323	1.09599	1.10957	1.12318	1.09701	1.17702	1.10131	1.22199	1.05635
Hs.249441	2.42344	2.28374	2.37377	2.59873	2.58919	2.76498	2.45165	2.30283	2.2636
Hs.249718	1.73389	1.7154	1.65998	1.47566	1.54382	1.54864	1.4222	1.5745	1.73046
Hs.250	1.09109	1.14597	1.06653	1.05978	1.0849	1.1098	1.08025	1.10124	1.08644
Hs.250083	1.14021	1.19205	1.19499	1.12246	1.15291	1.07182	1.1177	1.25781	1.13977
Hs.25022	0.965544	0.973493	1.05784	1.10273	1.00151	1.05544	1.06499	1.05648	1.06364
Hs.250615	1.49704	1.42288	1.20012	1.22331	1.20267	1.32763	1.3433	1.3731	1.51529
Hs.250666	0.913717	0.451767	0.485468	0.534272	0.465437	0.443566	0.474964	0.425772	0.47692
Hs.250822	0.479441	0.446771	0.451726	0.469941	0.411023	0.448994	0.451514	0.338065	0.223749
Hs.25155	0.18366	0.230534	0.282958	0.295629	0.29494	0.205191	0.207165	0.242853	0.27117
Hs.251680	1.0719	1.06011	1.04154	1.03268	1.02084	1.04548	1.06562	1.02939	1.07565
Hs.252229	2.0911	1.72051	1.93789	2.0579	1.91776	1.40922	1.37861	1.10167	1.45511
Hs.25292	0.930785	0.454687	0.477205	0.540602	0.501194	0.547503	0.647825	0.579665	0.730591
Hs.253197	0.563385	0.653679	0.756595	0.802369	0.829375	0.703016	0.724385	0.757283	0.861511
Hs.25348	0.989715	0.978553	0.841195	0.906823	0.944855	1.0116	1.03455	1.02838	1.06653
Hs.253495	1.07883	1.0888	1.02236	1.06711	1.01828	1.11265	1.11041	1.04588	1.066
Hs.2549	1.2097	1.1961	1.16873	1.19866	1.20004	1.23016	1.18593	1.22266	1.25098
Hs.255093	0.449201	0.451493	0.438311	0.430243	0.431865	0.463445	0.507916	0.438761	0.484904
Hs.2556	0.45166	0.454373	0.397718	0.436078	0.370577	0.364425	0.325908	0.356813	0.352438
Hs.256126	1.22971	1.42141	1.17921	1.11682	0.974332	1.08172	0.975002	1.50104	0.996272
Hs.2563	1.00794	1.06501	1.0591	0.986775	1.01208	1.04454	1.00862	1.02664	1.00994
Hs.25647	0.590233	0.123819	0.110129	0.12845	0.0958667	0.125227	0.132338	0.126357	0.235792
Hs.25960	4.49579	3.19944	2.69418	3.83059	4.17943	5.64705	4.87247	5.64954	8.23994
Hs.260074	1.0234	1.06432	1.0104	1.03858	1.03359	1.0012	1.02789	1.04633	1.01057
Hs.2624	1.03471	1.06125	1.06348	1.01366	1.0564	1.04829	1.03801	1.05448	1.0223
Hs.265174	0.928883	0.984098	0.80573	0.815163	0.77125	1.01718	0.972509	1.06058	0.93797
Hs.26770	0.457911	0.461685	0.475766	0.463716	0.394299	0.417467	0.395142	0.413619	0.419282
Hs.2681	0.81751	0.819232	0.734546	0.748285	0.765156	0.796655	0.755155	0.788374	0.738313
Hs.268177	1.17531	1.18896	0.882309	0.866245	0.845528	1.08636	1.01795	1.03	1.17595
Hs.268490	0.202257	0.219539	0.201153	0.207531	0.167846	0.206981	0.182605	0.163947	0.212803
Hs.269408	2.37308	2.19793	2.85111	3.48168	3.54255	2.52331	2.2301	2.62509	3.40819
Hs.269782	0.709764	0.643642	0.765904	0.724611	0.879323	0.784374	0.836086	0.822128	1.00267
Hs.270279	0.269713	0.270314	0.277915	0.283148	0.244166	0.27666	0.248525	0.239976	0.273079
Hs.270364	0.704565	0.719665	0.683145	0.690107	0.639345	0.684265	0.686126	0.654243	0.698
Hs.271771	1.53913	1.58454	1.62247	1.64507	1.34665	1.03323	0.998709	1.08984	1.08401
Hs.271940	0.819182	0.772375	0.731821	0.818928	0.752793	0.761603	0.77951	0.707808	0.706899
Hs.272396	1.22808	1.14996	1.1312	1.11612	1.18974	1.17907	1.16995	1.15907	1.13549
Hs.274313	0.51943	0.542545	0.506185	0.539316	0.489277	0.555026	0.595106	0.489146	0.315213
Hs.2780	2.27785	1.50589	1.00567	1.10766	1.09769	1.31018	1.31168	1.27734	0.911521
Hs.278432	0.796141	0.824582	0.796509	0.803472	0.817032	0.805399	0.785495	0.790339	0.800421
Hs.278957	1.03465	1.07232	1.05297	1.06673	1.03058	1.08039	1.07683	1.07109	1.09853
Hs.2795	0.0396122	0.0419241	0.0452347	0.0439748	0.0389992	0.0424375	0.0440762	0.0383373	0.040205
Hs.279567	1.162	1.2877	1.22371	1.1699	1.22854	1.30256	1.19926	1.55356	1.32142
Hs.280604	0.854256	0.84807	0.89161	0.858972	0.954535	0.806694	0.861106	0.92457	0.896463
Hs.281342	1.02168	1.01355	0.948334	0.992206	1.00983	1.00675	0.977539	0.995196	0.997298
Hs.2820	0.849755	0.880306	0.87383	0.884119	0.848529	0.895935	0.865375	0.813613	0.876842
Hs.282265	1.15759	1.07251	1.08298	1.13916	1.06468	1.03754	1.05803	1.06841	1.05621
Hs.282624	1.21325	1.21084	1.25042	1.21524	1.17222	1.24302	1.25978	1.16837	1.25836
Hs.282735	0.673227	0.732198	0.722203	0.696512	0.693951	0.690365	0.666964	0.629506	0.698101
Hs.2830	1.16781	1.19418	1.13432	1.10504	1.21019	1.21397	1.21072	1.21972	1.26034
Hs.283565	0.530455	0.526991	0.504158	0.509239	0.483916	0.542387	0.50217	0.464119	0.504292
Hs.283613	1.09481	1.03065	1.0515	1.04232	1.05321	1.03705	1.04092	1.04514	1.06655
Hs.283749	0.11919	0.132661	0.12053	0.113467	0.108849	0.125477	0.121522	0.122974	0.114032
Hs.283923	0.804093	0.814796	0.757668	0.808967	0.736736	0.825922	0.75503	0.751229	0.767589
Hs.283963	1.08991	1.13436	1.0801	1.08089	1.08105	1.09904	1.10381	1.1104	1.06516
Hs.284244	1.31689	1.05376	1.23027	1.08189	1.41437	1.23951	1.24151	1.30363	1.43178
Hs.284712	0.615243	0.657953	0.644756	0.654546	0.60581	0.650285	0.642569	0.570965	0.634057
Hs.287717	0.689992	0.705264	0.725993	0.670463	0.635704	0.603754	0.601078	0.487768	0.538862
Hs.2879	4.19813	4.63764	2.87017	3.26416	3.43599	5.03585	4.19215	7.98812	5.37802
Hs.289271	0.603746	0.556118	0.590579	0.512344	0.489092	0.509094	0.559118	0.389535	0.462583
Hs.290404	2.10695	2.40673	1.85142	1.96312	1.92078	2.52608	2.16166	2.69199	2.39556
Hs.292177	0.390317	0.428577	0.351522	0.34946	0.315574	0.358913	0.380013	0.368595	0.38688
Hs.292356	0.493264	0.506883	0.504052	0.490898	0.435203	0.482351	0.456532	0.459681	0.467393
Hs.29344	1.61953	1.19298	1.15497	1.2231	1.13948	1.25224	1.42035	1.30548	1.44676
Hs.2936	1.07076	1.00493	1.05541	1.08653	1.05711	1.10285	1.09219	1.0131	1.05057
Hs.295449	0.420272	0.454421	0.456509	0.456504	0.384353	0.419778	0.414342	0.38732	0.421665
Hs.297413	0.816992	0.838384	0.802339	0.830602	0.720527	0.783078	0.787023	0.722034	0.761113
Hs.2979	0.921746	0.988806	0.914138	0.899846	0.992214	0.968248	1.00086	0.960702	0.99139
Hs.298280	0.95867	0.996179	0.950368	0.928124	0.885382	0.953657	0.955159	0.884999	1.042
Hs.298658	0.669487	0.692792	0.701451	0.702954	0.736874	0.785714	0.807065	0.671467	0.705779
Hs.3003	0.832268	0.926956	0.869368	0.844	0.834737	0.862948	0.867814	0.783557	0.865476
Hs.300774	0.39859	0.370335	0.380857	0.392541	0.330626	0.304964	0.34611	0.276459	0.311051
Hs.301540	0.601173	0.645452	0.52682	0.5218	0.460545	0.647188	0.651114	0.6426	0.587326
Hs.301804	1.47	1.32431	1.39416	1.54226	1.82688	1.88596	2.25103	2.34236	3.19484
Hs.301865	0.504919	0.43769	0.345283	0.332544	0.428694	0.328055	0.271088	0.46297	0.311533
Hs.302002	1.05297	1.06207	0.994771	1.01057	0.97896	1.05176	1.01707	1.07771	1.03502
Hs.302145	0.209363	0.224311	0.208499	0.215221	0.172316	0.202719	0.186855	0.191311	0.19258
Hs.3022	1.20669	1.23962	1.13279	1.11722	1.21006	1.15527	1.14149	1.22991	1.16129
Hs.302740	1.01705	1.06034	1.08332	0.963933	1.0257	1.01179	1.00312	0.945417	1.07812
Hs.303649	0.983444	0.678029	0.578355	0.61655	0.560991	0.517784	0.492486	0.484788	0.701681
Hs.303980	1.06971	1.06933	1.03213	1.01897	1.01668	1.06545	1.01703	1.0284	1.04621
Hs.306178	1.57197	1.54118	1.30667	1.71716	1.82543	1.75336	2.00829	2.50565	3.29544
Hs.30956	1.0335	1.13518	1.01955	1.00402	1.0287	1.04799	1.04627	1.04316	1.0813
Hs.310893	1.06839	1.07781	0.968727	0.967636	1.03458	1.03043	1.0273	1.12544	1.08116
Hs.31210	5.4409	3.58853	3.28327	4.54584	4.04611	5.59706	5.97406	6.48543	5.55297
Hs.313	0.0297745	0.032758	0.0299567	0.033083	0.0258612	0.0314311	0.0314418	0.025844	0.0328996
Hs.315186	1.01756	1.05321	1.06709	1.05797	1.04467	1.0463	1.03546	1.05803	1.01846
Hs.315562	1.04008	1.05402	1.08335	1.1321	1.02568	0.823954	0.719916	0.733915	0.703394
Hs.31720	0.329289	0.35949	0.351753	0.347892	0.278044	0.331284	0.308151	0.305088	0.308513
Hs.3210	1.08238	1.08614	1.05405	1.00496	1.04421	1.07628	1.07312	1.056	1.10294
Hs.321045	0.84005	0.8647	0.873479	0.924631	0.905152	0.85091	0.927941	0.814232	0.820068
Hs.321541	0.899147	0.861574	0.926556	0.880039	0.852425	0.850278	0.819515	1.00949	0.80573
Hs.32405	0.701918	0.731777	0.726885	0.806107	0.621621	0.730231	0.717726	0.625459	0.69972
Hs.32539	1.07045	0.963374	1.00836	1.02396	1.0635	0.991816	0.992713	1.02309	1.01163
Hs.326	1.61441	1.43062	1.28818	1.22246	1.19682	1.2555	1.34953	1.12223	1.17724
Hs.326035	6.70348	0.193822	0.13612	0.16101	0.118591	0.165876	0.200965	0.298675	0.840553
Hs.32721	1.03753	1.07878	1.0361	1.03184	1.07588	1.01554	1.04897	1.12125	1.17512
Hs.327527	0.617046	0.593794	0.570985	0.543082	0.479102	0.496913	0.536098	0.434874	0.515869
Hs.32763	1.12002	1.06419	1.09585	1.11814	1.08354	1.10048	1.07325	1.09548	1.10167
Hs.32938	1.07097	1.04372	1.10493	1.0352	1.01872	1.02009	1.05218	1.05417	1.03562
Hs.329502	1.39901	1.32353	1.05196	1.03929	1.02979	1.3202	1.34509	1.14678	0.987183
Hs.331420	0.724805	0.660362	0.691227	0.580393	0.610898	0.552327	0.531525	0.529288	0.672717
Hs.332708	1.87262	2.03211	1.76436	1.96301	2.02178	2.42233	2.68734	2.63251	2.15386
Hs.333303	0.460206	0.448958	0.421584	0.443597	0.388681	0.438251	0.423399	0.350928	0.451541
Hs.333791	1.07525	1.03309	1.0326	1.09353	0.968517	0.991428	1.00698	0.981083	0.996062
Hs.334019	1.05315	1.08843	1.02614	1.04548	1.00006	1.01024	1.02394	1.01353	1.02934
Hs.334347	0.944514	0.933178	0.88313	0.927516	0.914085	0.926143	0.911484	0.888552	0.905404
Hs.33446	1.0202	0.960098	0.945996	0.92771	0.989593	0.924404	1.0074	0.884533	0.916481
Hs.334515	0.681305	0.646353	0.3047	0.358305	0.405555	0.620298	0.466638	1.49967	0.583895
Hs.334562	0.820218	0.832827	1.08661	1.05893	1.15406	1.12038	0.920334	0.811108	0.502165
Hs.335084	0.826583	0.807043	0.799549	0.760434	0.735623	0.780531	0.813191	0.702931	0.776939
Hs.335918	0.611803	0.599581	0.540877	0.523763	0.508278	0.594988	0.746324	0.676545	0.601661
Hs.339831	6.63745	6.54811	4.16137	4.59906	4.90707	6.10571	5.14816	6.89485	4.97469
Hs.34012	1.18575	1.10464	1.60682	1.27689	1.49487	1.39201	1.35822	1.08352	1.04743
Hs.34114	0.382983	0.372455	0.339688	0.372887	0.303226	0.336182	0.303464	0.339002	0.344646
Hs.34560	4.35166	4.04386	3.11079	3.73586	4.78901	7.45478	7.64899	8.29299	10.5512
Hs.346950	0.933823	0.981593	0.973769	0.984061	0.912579	0.976054	0.947879	0.934072	0.98441
Hs.347270	0.995604	0.920643	0.902713	0.931372	0.850436	0.854524	0.820146	0.897401	0.900906
Hs.348395	1.11624	1.09961	1.087	1.11092	1.09873	1.04076	1.07494	1.06365	1.11661
Hs.348500	0.962213	0.932409	0.905389	0.966487	0.898472	0.889433	0.908756	0.886563	0.883461
Hs.348883	0.676513	0.329436	0.323783	0.468149	0.561787	0.429334	0.483097	0.378798	0.593349
Hs.348935	0.486071	0.50439	0.488666	0.494306	0.4799	0.489393	0.509441	0.502461	0.522909
Hs.349110	0.078987	0.0937188	0.0887075	0.0811852	0.0721694	0.0787988	0.0844363	0.0814967	0.0998264
Hs.349204	1.00085	1.00209	1.00487	1.04713	1.02979	0.985749	0.986991	0.969995	0.940663
Hs.349642	1.58315	1.47514	1.31964	1.2455	1.3378	1.35099	1.33833	1.44039	1.41172
Hs.350321	0.863169	0.850677	0.84404	0.855754	0.840143	0.859876	0.845085	0.805459	0.86051
Hs.350966	1.00367	1.03375	1.03268	1.02805	0.92883	1.16233	1.23542	0.924586	0.330821
Hs.351593	0.37399	0.392769	0.373593	0.387322	0.357465	0.368561	0.357746	0.354206	0.368157
Hs.351887	0.903445	0.953228	0.903249	0.930323	0.864851	0.92855	0.887162	0.849343	0.892757
Hs.352	0.482244	0.562263	0.449433	0.453469	0.455542	0.460535	0.456848	0.489855	0.455715
Hs.356285	0.698513	0.717337	0.831773	0.841371	0.840391	0.732152	0.728616	0.687389	0.671982
Hs.356624	1.63436	1.71752	1.58953	1.58209	1.79792	1.91403	2.04631	1.91382	2.09574
Hs.35937	1.19675	1.23863	1.15193	1.32068	1.14127	1.17553	1.1786	1.38437	1.2058
Hs.359698	0.302154	0.290364	0.261802	0.302179	0.206624	0.22929	0.206386	0.244877	0.252237
Hs.36	1.21631	1.16655	1.26665	1.2571	1.21165	1.31024	1.20748	1.30661	1.20527
Hs.36137	0.948006	1.12121	0.99004	1.06371	0.894087	1.22873	1.11926	1.01442	1.23202
Hs.361463	0.397167	0.386136	0.343457	0.361846	0.344739	0.386888	0.361981	0.319762	0.376845
Hs.363137	0.712918	0.753702	0.80341	0.842794	0.77676	0.695043	0.630217	0.760407	0.820327
Hs.363138	1.30636	1.34343	1.62267	1.83216	2.06681	2.36096	3.31328	3.46776	3.12142
Hs.364941	1.03612	1.05178	1.06443	1.06656	1.13135	1.19863	1.19241	1.14361	1.24935
Hs.368149	1.17612	1.07085	1.00952	0.939563	0.762905	0.770501	0.75125	0.676345	0.887713
Hs.368153	1.0398	0.937556	0.883359	0.934052	0.886756	0.980665	0.908244	0.84726	0.86251
Hs.368226	1.0738	1.04323	1.0611	1.05312	1.06895	0.979072	1.07351	0.905795	1.02335
Hs.368243	0.199102	0.196383	0.193472	0.186929	0.159049	0.184385	0.16287	0.164783	0.175047
Hs.368587	0.836604	0.83792	0.837187	0.853626	0.856038	0.827897	0.835619	0.836549	0.841992
Hs.368632	1.0938	1.05244	1.06002	1.07672	1.02035	1.01073	1.03069	1.04045	0.978689
Hs.368982	2.75776	2.6712	1.91756	2.01306	2.11253	2.49801	2.30684	2.85061	2.65951
Hs.369581	2.20002	2.10869	2.62892	2.6425	3.05373	2.6321	2.70988	3.21376	2.83562
Hs.369646	2.28511	2.1902	1.86759	1.82483	2.00911	2.07697	2.0022	2.20388	1.89575
Hs.369675	2.04292	1.91096	2.80465	2.70495	3.78372	2.92256	2.77244	2.81833	2.31871
Hs.36975	1.14784	1.2014	1.2116	1.25074	1.1656	1.18302	1.14087	1.22173	1.13172
Hs.369779	0.980883	0.970214	1.55434	1.43448	1.63737	1.43984	1.47745	1.82997	1.67318
Hs.36989	4.26466	4.16286	3.90141	3.88863	4.59551	4.78123	6.08213	5.70104	4.57371
Hs.37003	0.880623	0.860399	0.7772	0.754567	0.703137	0.784526	0.765975	0.662592	0.633161
Hs.37009	2.20341	3.15569	2.3166	2.78444	2.09174	3.80535	3.11253	3.35202	3.37418
Hs.37023	0.974443	1.03128	0.999859	0.989286	0.992934	1.02315	1.02218	0.995253	1.04544
Hs.37045	1.04028	1.03512	1.03745	1.04763	1.05809	1.01709	1.06764	1.03995	0.998286
Hs.370487	0.859424	0.672705	0.560273	0.581786	0.615196	0.691228	0.711279	0.65743	0.749678
Hs.37058	1.15181	1.12269	1.051	1.04037	1.09733	1.03932	1.01384	1.00591	0.993868
Hs.370581	2.44567	2.4441	2.48995	2.28717	2.15652	1.63682	1.60179	1.54364	1.92333
Hs.370771	2.54329	1.95593	2.40989	2.5371	2.58377	2.81432	2.68667	2.04306	1.68215
Hs.37092	1.04794	0.950942	0.868083	0.862954	1.07345	1.07617	1.18771	1.28819	1.08168
Hs.371036	0.758421	0.753533	0.738678	0.771682	0.69186	0.789301	0.733316	0.791652	0.733532
Hs.371218	1.8712	2.08604	3.22894	3.40786	4.30671	4.14822	5.20449	5.51278	5.74551
Hs.371249	0.2654	0.281094	0.270063	0.275665	0.236559	0.271091	0.245855	0.242116	0.264742
Hs.371282	1.54933	1.44824	1.52143	1.52957	1.49901	1.69091	1.95334	1.49485	1.94945
Hs.37135	0.998498	1.09627	1.02572	1.0134	0.997505	1.07327	1.02637	1.00513	1.03704
Hs.371889	0.360311	0.340471	0.3487	0.34486	0.331398	0.356453	0.363533	0.256854	0.298069
Hs.372	1.10485	1.14072	1.12949	1.10578	1.07496	1.10035	1.05397	1.0894	1.08639
Hs.372840	0.841238	0.83482	0.798538	0.822603	0.759741	0.793273	0.804626	0.756146	0.803397
Hs.372914	0.238894	0.216748	0.209405	0.214755	0.208778	0.200661	0.219927	0.163503	0.152092
Hs.374596	1.43559	1.57721	1.30566	1.38376	1.36418	1.64301	1.57321	1.97672	1.89175
Hs.374668	1.05789	1.06182	1.0807	1.05235	1.13019	1.05093	1.09775	1.1095	1.14606
Hs.374990	34.6859	35.6196	36.5174	35.167	33.4716	36.5203	40.4124	49.5739	43.4007
Hs.375129	0.245356	0.259364	0.26858	0.299323	0.230298	0.232159	0.207383	0.205204	0.218496
Hs.375957	0.263487	0.252544	0.222874	0.23983	0.213438	0.23306	0.208231	0.247156	0.222029
Hs.376071	5.55135	5.60553	5.16364	5.04275	4.88792	3.65093	3.32509	2.55021	2.67297
Hs.37616	2.07455	1.98861	1.57563	1.53589	1.34801	1.46342	1.16804	1.09197	1.2174
Hs.376206	0.751886	0.806665	0.768909	0.751505	0.70995	0.764573	0.720196	0.723767	0.765713
Hs.377010	0.322453	0.318922	0.350285	0.301842	0.261655	0.250744	0.266411	0.20479	0.267244
Hs.377783	1.15322	1.0896	1.01539	1.063	1.04517	1.11638	1.15718	1.12335	1.10144
Hs.377894	0.490503	0.46015	0.505751	0.488274	0.471195	0.419921	0.43641	0.489232	0.414349
Hs.37860	0.70803	0.753132	0.757732	0.756997	0.664758	0.719543	0.692172	0.656029	0.72951
Hs.380135	0.0332094	0.0333748	0.0340621	0.0347549	0.028671	0.034788	0.0358522	0.0298085	0.0391284
Hs.380691	1.20864	1.0851	1.0903	1.12342	1.16116	1.1987	1.24589	1.42373	1.32599
Hs.381099	0.499196	0.499231	0.505408	0.508752	0.525755	0.52992	0.516267	0.479656	0.494804
Hs.386748	0.976429	1.0548	1.05196	1.02966	1.05769	1.05382	1.05567	1.04266	1.08378
Hs.387567	0.88082	0.885848	0.758006	0.740646	0.684311	0.705056	0.704151	0.644398	0.658817
Hs.388245	6.64066	6.42014	5.74703	5.96327	6.31694	7.0357	6.77436	7.53244	7.06232
Hs.389137	1.24356	1.20153	1.33186	1.40302	1.58101	1.77872	2.33417	1.89875	2.01158
Hs.389457	0.91685	1.01643	0.909551	0.886833	0.894527	0.993288	0.996222	0.994401	0.974524
Hs.389700	0.158567	0.167989	0.154392	0.159512	0.140624	0.162422	0.152104	0.150986	0.155993
Hs.391561	180.155	152.853	122.566	107.043	169.882	102.892	105.791	249.141	109.014
Hs.395482	1.57831	1.85239	2.26921	2.29533	2.50408	2.18404	2.37294	3.02476	2.8489
Hs.396530	0.700008	0.724708	0.714149	0.726083	0.657819	0.711511	0.68467	0.638701	0.683001
Hs.397609	0.325689	0.316946	0.320194	0.317626	0.291948	0.343737	0.377532	0.303974	0.325728
Hs.397729	0.561221	0.48731	0.430669	0.507111	0.589531	0.469058	0.687841	0.854748	0.534865
Hs.4	1.02441	1.08247	1.06339	1.0809	1.0874	1.11553	1.05656	0.989488	1.11154
Hs.400295	1.30186	1.3867	1.27048	1.21717	1.26034	1.43498	1.48272	1.54638	1.44369
Hs.401013	0.630177	0.6077	0.612103	0.629938	0.564564	0.589885	0.578516	0.566768	0.575073
Hs.404466	0.985214	0.988688	0.969375	0.946269	0.971663	1.00538	0.987166	1.02208	1.00953
Hs.40499	0.152232	0.164489	0.146776	0.161256	0.126077	0.139097	0.136533	0.131989	0.16504
Hs.405153	0.72604	0.698155	0.650954	0.647653	0.631904	0.716382	0.721917	0.646614	0.639675
Hs.405348	1.04295	1.01115	1.00179	1.04789	1.00502	0.964218	1.01575	1.06513	0.99456
Hs.405662	0.375927	0.37846	0.343523	0.356846	0.338321	0.371688	0.376336	0.356569	0.374926
Hs.405925	0.999381	1.01499	0.863302	0.936693	0.851698	1.41539	1.31101	0.85377	0.41949
Hs.405958	0.45045	0.465863	0.438597	0.489033	0.420292	0.324827	0.263776	0.22307	0.282716
Hs.406	1.07992	1.21306	1.16159	1.06285	1.12951	1.13941	1.21494	1.14476	1.15686
Hs.406013	0.439884	0.368632	0.264889	0.231869	0.201888	0.215989	0.196061	0.179672	0.191475
Hs.406293	0.883409	0.956362	0.956639	0.92264	0.915011	0.911945	0.930257	0.841172	0.906183
Hs.406515	1.67778	1.79445	1.7103	1.80124	1.65951	1.30987	1.11647	1.11503	1.05611
Hs.406678	1.36264	1.44346	1.50513	1.53414	1.68505	1.53198	1.62216	1.88615	1.92399
Hs.406687	0.936314	0.915299	0.827468	0.864681	0.876556	0.835039	0.797423	0.872559	0.793638
Hs.407506	0.993349	1.01712	0.967932	1.01832	0.952891	0.981739	0.970027	0.955445	0.980329
Hs.407587	1.08072	1.09433	1.06836	1.07222	1.12164	1.07104	1.10981	1.08855	1.03981
Hs.407856	0.92914	0.997101	0.918481	0.901698	0.919235	0.906975	0.889084	0.926426	0.991984
Hs.407995	0.384832	0.368816	0.370664	0.342925	0.341784	0.375062	0.364159	0.259905	0.265169
Hs.408182	0.638403	0.629543	0.582058	0.611286	0.572028	0.588398	0.6062	0.548233	0.565128
Hs.408528	0.472731	0.420449	0.712778	0.622101	0.809826	0.576243	0.558642	0.533367	0.603072
Hs.408767	1.01033	1.02256	0.958835	0.992525	0.977076	0.989734	0.998517	0.908314	0.944267
Hs.409934	1.05933	1.06682	1.03148	1.02697	1.03445	1.02397	1.00766	0.999366	1.01387
Hs.410026	1.21365	1.14223	0.905228	0.96345	0.954996	0.910723	0.853704	0.851455	1.0849
Hs.410969	1.13088	1.08406	1.07282	1.05965	1.07259	1.06206	1.15649	1.03802	1.06219
Hs.411312	1.0944	1.07072	1.06849	1.06121	1.0632	1.06967	1.14564	1.14476	1.13857
Hs.411472	0.581142	0.571086	0.558931	0.586553	0.531843	0.577029	0.526729	0.600727	0.511144
Hs.412433	1.0773	1.08068	0.940309	0.972873	0.919744	1.30078	1.27036	1.14167	1.13485
Hs.412484	2.17676	2.44261	2.9163	2.67668	2.42399	1.29638	1.23131	1.20887	1.1583
Hs.412710	0.966557	0.848991	0.77156	0.774719	0.933597	0.806746	0.783107	1.83451	0.860327
Hs.413899	1.02421	1.09877	1.00281	1.02058	1.02415	1.03861	1.06463	1.04085	1.0576
Hs.414795	0.597033	0.565887	0.53465	0.546161	0.446996	0.482263	0.444527	0.475012	0.439814
Hs.415058	0.790162	0.817881	0.779659	0.795246	0.816162	1.04935	1.39335	1.62698	1.56177
Hs.415117	5.02871	4.81797	3.91099	3.77681	3.67734	3.07009	2.88863	2.9101	3.12577
Hs.415768	0.844523	0.850161	0.836785	0.785752	0.788634	0.809258	0.796258	0.830207	0.791964
Hs.417050	1.00853	0.907713	0.940225	0.969558	0.915225	0.898726	0.928783	0.972304	0.971475
Hs.417962	0.624766	0.490639	0.467687	0.503456	0.4581	0.499785	0.552439	0.445007	0.635204
Hs.418012	1.09749	1.13371	1.06216	1.08869	1.06432	1.07119	1.14509	1.17704	1.28048
Hs.418167	0.398139	0.375915	0.371134	0.378957	0.358903	0.363411	0.352266	0.364634	0.348274
Hs.419240	0.15843	0.166392	0.156668	0.16682	0.146845	0.158728	0.151378	0.149493	0.156994
Hs.420036	0.980526	1.05804	0.990619	1.00389	1.01406	1.16323	1.08855	1.07973	1.02307
Hs.420830	1.12715	1.13223	1.08591	1.09132	1.11686	1.17434	1.25089	1.16745	1.20246
Hs.421202	0.994062	0.995238	1.04165	1.05818	1.12786	1.12387	1.19648	1.06456	1.16867
Hs.42146	0.80545	0.811074	0.776024	0.825174	0.843614	0.864877	0.887336	0.826769	0.917534
Hs.421509	1.08927	1.25532	1.05861	1.02383	0.985494	1.0041	0.863226	1.17729	1.13027
Hs.424414	1.23392	1.08796	0.975752	1.05085	1.11254	1.21475	1.32249	1.24762	1.31543
Hs.426485	1.06832	0.988569	1.04144	1.04093	1.07175	1.0382	1.046	1.04594	1.06521
Hs.427055	0.44332	0.485697	0.435149	0.456762	0.379315	0.42135	0.413258	0.353131	0.411685
Hs.427202	0.102756	0.109259	0.0960258	0.100143	0.0896846	0.0957361	0.0882049	0.0957007	0.100537
Hs.42853	1.01407	1.09638	1.05901	1.0769	1.10108	1.17674	1.31009	1.174	1.16436
Hs.42949	0.730928	0.725939	0.671361	0.719412	0.647304	0.743232	0.715636	0.587806	0.642856
Hs.429596	1.08829	1.12009	1.09453	1.11403	1.11684	1.17347	1.10787	1.25635	1.15545
Hs.429879	0.996922	1.03998	1.24878	1.27188	1.31107	1.16513	1.10781	1.25948	0.978569
Hs.430551	0.611705	0.587179	0.690047	0.677973	0.686098	0.634075	0.650582	0.633313	0.606927
Hs.431048	0.676053	0.61607	0.593674	0.583399	0.624609	0.627884	0.785555	0.528504	0.646795
Hs.431417	1.21559	1.18798	1.15864	1.22102	1.15511	1.22272	1.29004	1.21036	1.24465
Hs.431498	1.51952	1.51776	1.7532	1.79029	1.76015	1.44713	1.47236	1.87933	2.23896
Hs.431850	0.680229	0.698558	0.636419	0.627843	0.590964	0.612555	0.535638	0.465789	0.530845
Hs.432752	2.24696	2.14096	1.76724	1.68095	1.62435	1.44332	1.43593	1.56268	2.26807
Hs.432976	0.791493	0.779402	0.746678	0.784131	0.76339	0.824356	0.90177	0.683074	0.780943
Hs.433068	0.786408	0.775266	0.805722	0.851704	0.907178	0.956379	0.986748	1.31066	1.53334
Hs.43314	1.0685	1.15124	1.0938	1.18486	1.14775	1.27267	1.32617	1.20667	1.25838
Hs.433300	1.08998	1.0703	0.988917	0.938474	1.03498	1.00038	1.01066	1.05728	0.988209
Hs.433419	1.11681	1.10709	0.998337	0.999598	0.948375	1.04763	1.03017	0.932168	1.10641
Hs.434059	0.831836	0.79897	0.784299	0.690137	0.616569	0.558062	0.560501	0.488276	0.599618
Hs.434980	6.58133	7.30274	6.93459	7.6671	8.33137	9.06181	8.92557	12.8915	10.26
Hs.435136	0.698074	0.723742	0.775215	0.747251	0.730821	0.567137	0.521072	0.362381	0.390986
Hs.435609	1.0297	1.01009	0.92504	0.951009	0.963799	0.962659	0.95463	1.026	0.93035
Hs.435735	0.751681	0.727378	0.687671	0.651941	0.579492	0.595331	0.593935	0.506748	0.62827
Hs.435771	0.66235	0.633536	0.834174	0.789139	0.792881	0.646177	0.620789	0.641496	0.653457
Hs.436023	1.14715	1.32669	1.13625	1.21618	1.11367	1.38129	1.22198	2.19696	1.86098
Hs.436061	1.29107	1.0025	1.09759	1.2049	1.20969	1.55096	1.85991	1.78448	1.78314
Hs.436181	0.946469	0.87776	0.718069	0.726267	0.776389	0.835461	0.745085	0.930481	0.731225
Hs.436317	0.923989	0.847136	0.837122	0.879293	0.844818	0.800551	0.814526	0.883295	0.851256
Hs.436416	0.629909	0.700256	0.653349	0.71378	0.66484	0.827524	0.842181	0.845826	0.609229
Hs.436657	0.533884	0.543698	0.477649	0.519629	0.49534	0.581877	0.54713	0.622402	0.467827
Hs.436873	0.630083	0.588627	1.01028	0.929865	1.14381	0.958516	1.11599	1.08334	0.998861
Hs.436885	0.728462	0.696281	0.683547	0.665655	0.662458	0.731539	0.722752	0.660063	0.708709
Hs.436911	0.0584498	0.0666096	0.0643115	0.0668631	0.0575805	0.0742857	0.076509	0.0621293	0.0777116
Hs.436975	1.68764	1.35259	1.75399	1.56225	2.02422	1.70067	1.9145	1.8134	1.72921
Hs.437060	0.793484	0.77269	0.763607	0.707977	0.606923	0.559913	0.503929	0.545621	0.620495
Hs.437322	0.796433	0.820608	0.777652	0.795993	0.750454	0.761696	0.768035	0.704481	0.747365
Hs.437609	1.12911	1.69077	2.27711	2.34229	2.86171	2.58568	2.91714	3.9138	2.45018
Hs.437705	1.67279	1.33841	0.963474	0.948674	0.856297	0.897127	0.718841	0.634755	0.767535
Hs.437905	1.20114	1.19364	1.10647	1.15081	1.13652	1.13987	1.12202	1.13653	1.14446
Hs.438016	1.144	1.11367	1.13031	1.14622	1.13114	1.13542	1.14192	1.12588	1.14016
Hs.438102	0.0769858	0.0844732	0.0789481	0.0846618	0.0749877	0.101029	0.106833	0.0811609	0.0548593
Hs.438231	0.177304	0.19517	0.190357	0.198945	0.159772	0.170895	0.165075	0.151053	0.172588
Hs.438265	1.0193	1.00661	1.00192	1.022	0.98812	1.00906	1.00402	1.00312	1.06145
Hs.438678	0.973149	0.976228	0.858377	0.887262	0.823336	0.953735	0.929182	0.777457	0.713732
Hs.438838	1.58193	1.5254	1.51345	1.60115	1.79496	1.68984	1.78384	2.28583	2.27892
Hs.438863	0.13038	0.140886	0.13658	0.134729	0.104923	0.140116	0.141931	0.123483	0.142076
Hs.438918	0.995059	0.912909	0.93856	0.891009	0.93679	0.88176	0.943766	0.891962	0.838019
Hs.439056	0.987968	1.05181	1.00186	0.985418	1.01103	1.0622	1.05244	1.05496	1.0174
Hs.439312	0.444947	0.456905	0.422508	0.421544	0.363416	0.416152	0.39365	0.325767	0.405367
Hs.439777	0.385082	0.399964	0.389227	0.409917	0.326233	0.369615	0.38989	0.355922	0.4547
Hs.440379	0.754979	0.819924	0.776511	0.797667	0.736459	0.793459	0.75323	0.724443	0.788442
Hs.440438	1.56189	1.76372	1.72348	1.7218	1.86428	2.2436	2.42516	2.33817	1.82669
Hs.440829	6.69877	3.80322	3.38048	3.46863	3.34172	2.77526	3.80115	3.66247	5.36354
Hs.440895	0.928455	0.956089	0.920859	0.955756	0.914727	0.955973	0.93137	0.953843	0.958534
Hs.440934	0.72806	0.797017	0.776099	0.751564	0.715389	0.755381	0.751971	0.728912	0.731882
Hs.441047	0.0509404	0.0540122	0.0481298	0.0495303	0.0371273	0.0452446	0.0443101	0.0397251	0.0384343
Hs.441113	0.157915	0.168807	0.157169	0.161182	0.131605	0.15383	0.148158	0.134523	0.149907
Hs.44227	1.28626	1.21533	1.25492	1.22932	1.27873	1.20055	1.18801	1.08023	0.984358
Hs.442344	0.713724	0.876155	0.777555	0.804704	0.726692	0.89984	0.822543	0.719707	0.931423
Hs.443625	42.2974	38.4611	28.0569	28.6554	39.6595	40.0692	41.1624	75.3952	48.4242
Hs.443650	1.31586	1.28224	1.74439	2.04052	2.25975	1.82806	2.35834	2.40242	2.60908
Hs.443914	0.597073	0.655891	0.675161	0.756838	0.737268	0.758492	0.74954	0.653623	0.591733
Hs.444082	0.711328	0.756218	1.08076	1.18081	1.10281	0.863675	0.795471	0.776289	0.628605
Hs.444212	0.34629	0.352859	0.31829	0.320821	0.260662	0.304885	0.287461	0.339702	0.299019
Hs.444448	1.66771	1.19222	0.829267	0.927289	0.978066	1.18196	1.14781	1.04984	1.19025
Hs.444959	2.9963	3.34278	2.77646	2.90854	3.08031	3.46201	3.94778	5.31076	4.66305
Hs.445040	0.688452	0.647288	0.725912	0.715457	0.769724	0.723565	0.66326	0.877796	0.766085
Hs.445358	0.261633	0.264427	0.259012	0.266554	0.241749	0.242818	0.234917	0.247076	0.236596
Hs.445534	0.977354	0.853221	0.893113	0.919554	0.898434	0.915963	0.984431	0.872579	0.841875
Hs.445757	1.25828	1.59754	1.44932	1.40669	1.00589	1.15137	0.976084	0.867356	1.20692
Hs.445758	3.3185	3.21713	2.55137	2.36753	2.50908	2.479	2.35812	2.71894	3.0399
Hs.445827	0.94477	1.08355	1.21295	1.32227	1.45959	1.37559	1.6	1.97733	1.67308
Hs.445898	0.380879	0.372495	0.401905	0.403232	0.347152	0.393845	0.37097	0.298775	0.346887
Hs.446309	0.912356	0.913294	0.931768	0.926126	0.935922	0.871564	0.896706	0.938438	0.86124
Hs.446352	0.89335	0.927479	0.814654	0.839791	0.756731	0.741781	0.756571	0.699125	0.615182
Hs.446414	1.18207	1.25407	1.30675	1.38251	1.35078	1.16648	1.05114	1.80206	1.54933
Hs.446429	1.36374	1.53681	0.994145	1.15989	1.17043	1.75147	1.44149	2.40157	1.79251
Hs.446683	1.1021	1.11057	1.06288	1.12725	1.11008	1.06287	1.10619	1.04303	1.09122
Hs.447793	0.755943	0.803896	0.77077	0.761106	0.767881	0.787097	0.75179	0.707755	0.770835
Hs.447968	0.988278	1.02359	0.987407	0.972398	1.05326	1.02493	1.01973	1.05062	0.998523
Hs.449630	0.184221	0.189486	0.178682	0.17998	0.175644	0.19675	0.206036	0.198918	0.19998
Hs.449738	1.0044	0.953616	0.970679	1.03678	0.958396	0.970179	0.931144	0.974953	0.960795
Hs.449968	0.261709	0.271924	0.265113	0.272464	0.234434	0.272991	0.25467	0.240328	0.252862
Hs.450230	0.366463	0.35181	0.300209	0.345471	0.308401	0.337959	0.359033	0.343238	0.200847
Hs.455323	0.914216	0.940213	0.929966	0.922945	0.888783	0.932134	0.908775	0.899224	0.92695
Hs.458272	1.02967	1.12235	1.06153	0.995306	1.04002	0.979286	1.03235	1.01021	0.991682
Hs.458406	3.15529	3.33786	2.0465	2.32802	2.4254	2.98405	2.49387	3.80769	2.57728
Hs.458414	0.983307	1.00313	0.932458	0.98118	0.941583	1.22684	1.49973	1.60821	1.95551
Hs.458426	1.3408	1.26238	1.15252	1.2091	1.1053	1.09476	1.07608	1.33946	1.09089
Hs.458482	0.901556	0.899983	0.920537	0.857988	0.866845	0.936387	0.843067	0.872186	0.89974
Hs.458485	0.84857	0.925451	0.945158	0.988546	0.825693	0.973084	1.02208	0.858914	1.02268
Hs.459649	0.733761	0.693554	0.757704	0.782502	0.798779	0.802665	0.928789	0.686883	0.783062
Hs.459927	1.32583	1.36154	1.10283	1.06494	1.38576	1.22472	1.06174	1.06817	1.08602
Hs.460	0.868481	0.730772	0.700668	0.734333	0.656258	0.659391	0.607788	0.597684	0.644848
Hs.460109	1.10973	1.08296	1.08169	1.10126	1.17316	1.21184	1.24441	1.31533	1.14716
Hs.460645	1.94268	1.29055	1.36614	1.27165	1.57953	1.56793	1.36481	1.93203	1.68994
Hs.461047	0.612857	0.628404	0.621122	0.617007	0.550627	0.587598	0.566712	0.508364	0.53585
Hs.461086	0.0455773	0.0466977	0.0433876	0.0472423	0.0376741	0.0458328	0.0469295	0.0472845	0.042663
Hs.463059	1.01364	1.00773	0.908299	0.889396	0.949841	1.02467	1.10638	0.953113	1.02415
Hs.46320	0.800682	0.795099	0.826217	0.759108	0.792317	0.759249	0.769732	0.76549	0.748818
Hs.463300	0.610695	0.630353	0.589585	0.608363	0.622281	0.608099	0.608643	0.569313	0.602581
Hs.464137	1.1255	1.3303	1.51285	1.52885	1.57374	1.29056	1.33093	1.4887	1.30194
Hs.464829	0.200976	0.207096	0.204408	0.218865	0.173923	0.200381	0.183573	0.177948	0.214438
Hs.465087	0.771643	0.722787	0.715783	0.783981	0.721347	0.761407	0.761426	0.714271	0.774857
Hs.465642	0.796984	0.805098	0.679109	0.7064	0.785652	0.883464	0.932841	0.930823	0.792615
Hs.465744	0.578233	0.558907	0.592607	0.61224	0.542085	0.611466	0.649367	0.546687	0.562442
Hs.465778	1.05755	1.13542	1.09086	1.0641	1.02676	1.08111	1.0844	1.13975	1.07514
Hs.465929	0.80768	0.813014	0.729474	0.629684	0.485899	0.475888	0.450807	0.295921	0.454348
Hs.467020	2.14698	3.10687	3.73109	4.06495	3.95641	5.59956	4.65146	4.7685	2.89792
Hs.467554	0.938735	0.968246	0.961835	0.957628	1.05283	1.00938	1.04532	1.00154	0.922474
Hs.467701	3.40648	3.41115	2.44563	2.43505	2.23355	2.41383	1.94076	1.98333	2.03099
Hs.468274	1.25585	1.29813	1.40162	1.39907	1.39758	1.1561	1.16659	1.16453	1.04818
Hs.46835	1.25569	1.2244	1.17875	1.20254	1.18789	1.16032	1.25161	1.19213	1.13878
Hs.468410	0.25312	0.269741	0.254585	0.301227	0.302716	0.407142	0.411829	0.347411	0.280141
Hs.468490	1.18017	1.1784	1.18585	1.19407	1.16757	1.16409	1.16612	1.16301	1.14264
Hs.469116	1.10292	1.10066	1.03372	1.02379	1.0248	1.00788	1.00389	0.927177	1.00088
Hs.469264	1.67212	1.84793	1.30491	1.28272	1.10254	1.24334	1.0562	1.20562	1.66655
Hs.470627	0.220543	0.250001	0.232832	0.249683	0.18714	0.225897	0.211764	0.179631	0.220844
Hs.471014	0.923651	0.937317	0.867912	0.901909	0.903191	0.948773	0.92582	0.787145	0.860187
Hs.471508	1.83649	1.50943	0.889266	0.86554	0.746601	0.657732	0.619721	0.849632	1.15494
Hs.472010	0.29088	0.337319	0.382225	0.41309	0.393613	0.307503	0.327266	0.442103	0.452347
Hs.472860	0.746247	0.732941	0.714358	0.741217	0.760696	0.82233	0.880934	0.932293	1.02344
Hs.473152	0.655376	0.591269	0.424318	0.53606	0.498521	0.62469	0.492416	0.854172	0.633535
Hs.473163	1.63282	1.66534	1.55631	1.71008	1.75213	1.82654	1.84931	1.81603	1.35404
Hs.473470	1.45714	1.36443	1.80324	1.64048	2.06755	1.73269	1.69895	1.74209	1.37956
Hs.473583	1.81593	1.86722	1.77764	1.89469	1.79909	2.02281	1.64871	1.33597	1.15314
Hs.474781	0.823545	0.784541	0.821756	0.816724	0.80717	0.783357	0.800771	0.716827	0.831136
Hs.474787	0.98858	0.919605	0.937033	1.01664	0.873339	0.924579	0.880678	0.856665	0.895033
Hs.475733	0.406394	0.390912	0.645629	0.596113	0.8167	0.663647	0.753069	0.776072	0.772821
Hs.476179	0.553979	0.608297	0.658401	0.663675	0.713068	0.686198	0.716088	0.769825	0.837972
Hs.476218	0.319574	0.381201	0.381596	0.351807	0.293682	0.329848	0.324291	0.289918	0.332195
Hs.476308	0.92747	0.824148	0.811348	0.810981	0.808281	0.820722	0.87054	0.705508	0.737887
Hs.477866	1.45042	1.44221	2.21237	2.3039	3.20095	3.13877	3.1508	3.89539	3.46984
Hs.477879	0.48916	0.39162	0.408056	0.382208	0.413603	0.511082	0.561664	0.303034	0.290578
Hs.477887	0.951141	1.07895	1.06272	1.02114	1.04549	1.02028	1.05875	1.02058	0.987562
Hs.478588	0.551264	1.07946	0.929942	0.976228	0.951422	1.18326	1.14875	1.50535	1.31392
Hs.479754	48.5732	49.1222	65.9017	74.9009	98.3133	73.932	87.4544	134.28	128.646
Hs.479756	1.13048	1.15899	1.21167	1.19869	1.14234	1.17797	1.21018	1.13122	1.17593
Hs.480218	0.379872	0.422313	0.417145	0.407819	0.346813	0.346285	0.341226	0.328667	0.330117
Hs.481371	0.866744	0.966361	1.50876	1.62509	1.6496	1.32744	1.47011	1.45973	1.1642
Hs.482562	0.57401	0.625583	0.63353	0.650969	0.567016	0.564356	0.547123	0.625616	0.565347
Hs.48297	1.83636	1.85362	2.00542	1.8923	2.09636	1.97288	1.84075	2.01761	2.09594
Hs.483239	0.35341	0.36123	0.36194	0.385506	0.350459	0.411073	0.427779	0.440365	0.486834
Hs.483519	1.0154	1.03972	1.02389	1.02925	0.9773	1.03083	0.970928	0.984115	1.01245
Hs.483765	0.807017	0.843652	0.802502	0.831732	0.736608	0.758436	0.804497	0.74087	0.878651
Hs.484738	0.503867	0.589263	0.617086	0.608649	0.592778	0.694852	0.621455	0.586451	0.730011
Hs.485104	0.828291	0.83676	0.717449	0.723388	0.717795	0.805089	0.756101	1.10582	0.822902
Hs.485130	0.331031	0.354367	0.35304	0.359294	0.293013	0.336622	0.328995	0.288071	0.366712
Hs.485438	1.12377	1.04736	1.06173	1.01586	1.00366	1.06717	1.07349	1.09277	1.02844
Hs.4865	1.10864	1.0879	1.08728	1.08673	1.15029	1.10277	1.08891	1.08622	1.08884
Hs.486502	0.559376	0.600182	0.67205	0.648918	0.605734	0.469341	0.440586	0.45898	0.444988
Hs.487046	0.808335	0.843587	0.821984	0.849246	0.834471	0.851725	0.812603	0.911289	0.90796
Hs.487062	1.71811	1.81514	1.74471	1.7504	1.83134	2.26407	2.00562	1.81105	1.55054
Hs.488293	3.78435	3.96312	3.88287	4.04321	3.79756	2.93483	2.71207	2.45393	2.60232
Hs.489033	3.29469	3.14687	4.47841	4.63456	5.02277	3.90505	4.1303	5.80961	4.99214
Hs.489127	0.375196	0.382611	0.356622	0.38172	0.339445	0.432053	0.319143	0.346515	0.342297
Hs.489142	0.145671	0.150526	0.141303	0.149726	0.132121	0.143777	0.141954	0.130556	0.143829
Hs.489786	0.96469	0.957883	0.972741	0.969111	0.979719	0.989906	0.972136	0.953543	0.986789
Hs.490330	0.952202	1.27177	1.76042	1.85284	1.50733	1.99001	2.33088	1.01137	2.27581
Hs.491494	0.83691	0.959818	0.622965	0.558402	0.453556	0.519913	0.448751	0.450489	0.518826
Hs.491582	83.0083	78.9102	74.2129	70.4683	73.6799	80.0644	102.658	125.317	144.709
Hs.492280	0.889648	0.890129	0.819384	0.863669	0.82677	0.978067	1.01423	0.918584	0.866648
Hs.492333	2.28199	2.23337	2.66273	2.65964	3.26246	3.02163	2.8262	3.71413	3.25431
Hs.494312	1.09737	1.14892	1.0693	1.09874	1.12233	1.09456	1.09091	1.1007	1.1012
Hs.494529	2.8883	3.11788	2.63111	2.55471	2.69795	3.45321	3.55294	4.34436	4.20722
Hs.494538	3.39999	3.34965	3.53651	4.06139	4.22732	4.19314	4.36236	5.35467	6.65571
Hs.494622	0.4977	0.508734	0.523324	0.489713	0.504948	0.559963	0.473551	0.638044	0.503268
Hs.495108	1.20025	1.28192	1.26179	1.18901	1.17373	1.13679	1.17719	1.25664	1.1647
Hs.495473	0.833837	0.781344	0.757537	0.820396	0.8015	0.956539	0.943715	0.800929	0.812822
Hs.495912	0.910521	0.912718	0.889434	0.904959	0.903007	0.922666	0.912995	0.856928	0.911791
Hs.495985	0.963696	0.942566	0.934251	0.928336	0.938193	0.926529	1.30988	1.2191	1.43144
Hs.496240	0.633039	1.03588	0.833653	1.02689	0.632888	1.15617	1.03273	0.769021	1.03364
Hs.496270	0.733391	0.698339	0.669932	0.631785	0.6967	0.718166	0.698057	0.800369	0.738856
Hs.497589	1.11975	1.08799	1.09735	1.15475	1.09588	1.10571	1.08581	1.11939	1.0976
Hs.497599	0.59928	0.550922	0.483621	0.451282	0.405505	0.346885	0.312357	0.250774	0.328405
Hs.498248	0.796973	0.697486	0.858305	0.918073	0.862256	0.791288	0.600726	0.552217	0.603263
Hs.498494	1.55097	1.61239	1.47811	1.44728	1.52964	1.58669	1.51629	1.30215	1.00481
Hs.4998	0.370237	0.390875	0.406858	0.40944	0.375087	0.375979	0.350358	0.34947	0.384029
Hs.499839	0.525036	0.511079	0.570126	0.558577	0.542584	0.642104	0.675922	0.574608	0.720027
Hs.50002	1.01796	1.11437	1.03247	1.01113	1.01791	1.10284	1.04854	1.11061	1.05418
Hs.500466	1.59071	1.50524	2.02927	2.13601	2.49908	2.13399	2.21049	2.65723	2.33097
Hs.500483	10.3279	9.84424	8.27621	7.4522	8.28649	7.85811	7.15758	7.45044	6.56415
Hs.500756	1.31435	1.31118	1.12289	1.10282	1.02413	1.14401	1.0334	0.934719	0.911498
Hs.501023	0.56163	0.678663	0.864854	1.05754	1.10871	1.12466	1.14132	1.38201	1.30661
Hs.501452	1.21275	1.23104	1.13532	1.16787	1.21749	1.25561	1.36621	1.39235	1.11924
Hs.501629	1.2645	0.141108	0.158217	0.244395	0.235712	0.246875	0.269567	0.2483	0.397834
Hs.501778	3.52029	3.90053	4.94484	5.00596	6.36567	5.45504	6.8544	8.23137	8.2572
Hs.502182	2.12244	1.53269	1.334	1.24905	1.18103	1.08229	1.1577	1.19519	1.41841
Hs.50223	0.132747	0.140742	0.138596	0.141967	0.126825	0.146296	0.149356	0.141426	0.167058
Hs.502302	0.938378	1.09034	1.19441	1.31116	1.42634	1.3499	1.51194	1.76591	1.92171
Hs.502328	0.93883	0.971024	0.871036	0.951854	0.826204	0.851608	0.842587	0.815215	0.618221
Hs.502511	2.74198	4.16192	2.93855	3.67091	2.89918	4.86632	4.44792	4.67906	4.86846
Hs.502769	0.565493	0.473074	0.500835	0.526769	0.456778	0.431744	0.444929	0.353022	0.425625
Hs.502823	0.90344	0.851658	0.786068	0.792596	0.739897	0.871491	0.984094	0.910245	0.817721
Hs.502829	0.777945	0.692338	0.658643	0.636173	0.610824	0.621158	0.65732	0.57061	0.660703
Hs.502875	0.800581	0.709556	0.665835	0.681372	0.6727	0.727115	0.787848	0.640423	0.735958
Hs.503043	1.28394	1.30555	1.12418	1.19098	1.22619	1.47629	1.56165	1.42703	1.33816
Hs.503284	2.70285	2.56455	2.34032	2.59762	2.77009	3.23462	3.91952	3.24655	3.34069
Hs.503555	0.0876597	0.0921818	0.0879574	0.0954954	0.0782431	0.0882274	0.0827963	0.0760988	0.0872386
Hs.503878	0.953658	0.915121	0.899884	0.893213	0.89259	0.930407	0.917231	0.872043	0.896085
Hs.503911	0.059467	0.0596548	0.055064	0.0589102	0.0503675	0.0566411	0.0570354	0.0519007	0.056646
Hs.504003	1.52636	1.6671	1.74151	1.89889	1.79786	2.05296	2.28849	2.61718	3.47088
Hs.504048	0.101583	0.108943	0.0999942	0.10763	0.0884423	0.108644	0.0964616	0.142967	0.106807
Hs.504281	0.356803	0.381718	0.373045	0.388968	0.379717	0.371315	0.364699	0.371697	0.351833
Hs.504609	0.260723	0.245806	0.230814	0.240121	0.208012	0.245327	0.217332	0.203869	0.219995
Hs.504966	0.988776	1.02843	1.0069	1.01731	1.03959	1.01404	0.992835	1.01127	0.945675
Hs.505033	0.579056	0.46949	0.593777	0.581356	0.650858	0.512973	0.547825	0.537728	0.561561
Hs.505654	1.18316	1.0616	1.09807	1.07227	1.00578	0.892295	0.920486	0.642026	0.564795
Hs.505777	2.15477	1.92486	1.81093	1.80238	1.75104	1.46392	1.52126	1.48922	1.25045
Hs.505924	4.33126	4.33499	3.35461	3.11311	3.30664	2.61746	2.22439	2.19418	1.41796
Hs.50640	1.05432	0.946229	1.02523	1.03677	1.15409	1.09193	1.27665	1.02476	1.06203
Hs.506659	1.07149	1.01052	1.03247	1.0531	1.03376	0.992267	1.08652	1.03222	1.02234
Hs.506759	1.02095	1.06366	1.04582	1.17119	1.22511	1.10486	1.06837	1.20715	1.14987
Hs.507475	0.668929	0.67533	0.89008	0.920434	1.05515	0.843237	0.771954	0.769295	0.678108
Hs.507658	0.827489	0.845404	0.800577	0.79373	0.758722	0.841354	0.815932	0.786144	0.799641
Hs.508234	0.915372	0.928698	0.948631	0.912205	0.94351	0.874785	0.844997	0.927553	0.957803
Hs.508716	6.98857	6.91847	7.00632	8.01887	7.69021	8.8269	10.438	10.7316	12.1167
Hs.508835	0.787738	0.831036	0.749722	0.815548	0.717362	0.714473	0.685439	0.641754	0.631584
Hs.508950	0.775769	0.818986	0.780703	0.806286	0.760517	0.835973	0.789025	0.607681	0.806895
Hs.509067	2.29323	2.52456	2.18712	2.58321	2.71894	3.36234	3.78807	3.73535	2.77248
Hs.510334	0.158723	0.165983	0.152448	0.164687	0.139381	0.162784	0.161317	0.148482	0.159914
Hs.510521	0.93602	0.904633	0.87526	0.921302	0.903964	0.936723	0.913704	0.979861	0.919289
Hs.510635	0.9611	0.9704	0.957528	0.9435	0.930819	0.95571	0.961391	0.937173	0.961313
Hs.511143	0.438849	0.487525	0.710099	0.770441	0.782596	0.575296	0.631164	0.758965	0.676614
Hs.511899	0.465644	0.409302	0.372805	0.413507	0.386603	0.402463	0.39075	0.367103	0.416183
Hs.512152	0.777629	0.808918	0.785298	0.753539	0.795776	0.821673	0.832816	0.840968	0.841672
Hs.512382	1.15292	1.26222	1.32151	1.25637	1.21911	1.06362	0.869935	0.925243	0.765091
Hs.512464	0.526113	0.564398	0.501098	0.531314	0.499466	0.666162	0.813969	0.762005	0.752495
Hs.512587	0.108443	0.123994	0.120391	0.128525	0.101709	0.12145	0.141464	0.11306	0.149336
Hs.512599	5.53868	5.23521	5.40218	5.07279	5.2587	5.10196	5.53181	3.72031	4.01845
Hs.512633	0.890806	0.864401	0.834491	0.838248	0.793147	0.84952	0.820184	0.820491	0.791352
Hs.512636	0.920384	0.764298	1.10848	1.27635	1.48489	1.33476	1.47152	1.66965	1.61347
Hs.512682	0.638774	0.668108	0.642925	0.663751	0.664627	0.680232	0.728212	0.78868	0.972565
Hs.512690	2.62767	2.82027	1.92406	2.27877	2.33644	3.43725	3.11894	3.39612	3.1596
Hs.512714	1.07929	1.09632	1.10841	1.11724	1.04776	1.05019	1.07102	1.05992	1.05728
Hs.513153	0.912354	0.898036	0.914687	0.879336	0.876453	0.882389	0.891325	0.924629	0.914054
Hs.513457	0.209526	0.182721	0.1401	0.122079	0.0901168	0.107599	0.0999019	0.102588	0.125985
Hs.513463	3.61634	3.53068	3.35486	3.27693	3.64414	4.23843	4.54237	4.78957	4.69715
Hs.513490	0.286139	0.256502	0.235202	0.23728	0.264817	0.279008	0.286369	0.30385	0.23196
Hs.513609	0.944661	1.11375	1.39523	1.48963	1.6148	1.43916	1.38978	1.69451	1.54532
Hs.513617	2.19913	2.14582	2.05892	2.10902	2.44425	2.8696	3.37009	3.00585	3.52116
Hs.513711	0.0720372	0.0746413	0.0674351	0.0742065	0.0600553	0.0735575	0.0766225	0.0646193	0.0712224
Hs.513803	0.204593	0.228603	0.2098	0.211073	0.17162	0.213938	0.225809	0.155683	0.211831
Hs.513829	0.554504	0.54161	0.558304	0.55031	0.509875	0.5375	0.635697	0.581555	0.65757
Hs.513915	0.348537	0.356183	0.336502	0.36502	0.297229	0.34949	0.329648	0.255695	0.334507
Hs.514107	1.06959	1.04516	0.991957	1.05473	0.994179	1.03871	1.0236	0.95375	1.0184
Hs.514174	0.657818	0.672738	0.759174	0.752891	0.777195	0.859402	1.00538	0.738836	0.726181
Hs.514227	0.905809	0.888707	0.880084	0.90404	0.865523	0.88849	0.895344	0.913468	0.925259
Hs.514289	2.51936	1.56626	1.68131	1.65038	1.60512	1.53697	1.65916	1.36892	1.50338
Hs.514292	0.890997	0.826451	0.84821	0.893107	0.855871	0.908862	0.831045	0.824929	0.831997
Hs.514303	0.562578	0.545428	0.517263	0.479754	0.446932	0.440305	0.423769	0.334943	0.424863
Hs.514451	1.05478	1.03435	1.01	1.00806	0.98847	1.02953	1.08709	1.05442	0.999694
Hs.514527	2.17952	2.12335	1.97648	1.90286	1.68389	2.0972	2.15518	1.35572	0.679289
Hs.514581	1.36916	1.10664	0.99412	0.845316	0.822984	0.741422	0.72973	0.536737	0.735665
Hs.514681	2.28172	2.11086	2.93787	3.02429	3.33406	2.44976	2.62246	3.2629	3.17485
Hs.514821	0.868725	0.854334	0.834345	0.837237	0.809223	0.825074	0.801095	0.843915	0.837739
Hs.515016	1.91261	1.78076	1.45163	1.54927	1.54516	1.76165	1.91224	1.93035	2.2471
Hs.515122	2.94862	2.77224	3.17584	3.56183	3.78601	4.77743	5.5795	4.4209	2.48534
Hs.515162	2.77305	2.9322	2.25756	2.44792	2.35493	2.84067	2.53748	2.7013	1.58862
Hs.515210	0.884548	0.55579	0.516823	0.554964	0.500332	0.635685	0.706934	0.631808	0.822588
Hs.515247	3.36818	3.46362	3.25058	3.42079	3.53812	4.30506	5.81953	7.26202	6.8946
Hs.515366	0.742793	0.779755	0.639056	0.768264	0.616174	0.663595	0.700764	0.622694	0.682451
Hs.515427	0.449491	0.426156	0.442601	0.452306	0.41915	0.438463	0.441146	0.325287	0.35931
Hs.515835	0.591866	0.603545	0.588915	0.603405	0.542484	0.573029	0.555953	0.583052	0.566791
Hs.515840	2.63722	2.57053	2.15133	2.19681	2.21417	2.61754	2.7814	2.85475	2.93822
Hs.516157	0.616646	0.292786	0.183292	0.217122	0.264181	0.405114	0.464508	0.414472	0.632648
Hs.516176	1.0414	1.05388	0.978133	1.02857	1.01337	1.04765	1.0564	1.01579	1.02883
Hs.516297	2.05448	2.04212	1.67925	1.59393	1.8167	1.42434	1.74623	1.64951	1.54582
Hs.516439	1.07534	1.12325	1.0527	1.13687	1.04899	1.09034	1.07632	1.08833	1.12515
Hs.516484	0.746858	0.81217	0.724138	0.719495	0.652795	0.650449	0.62722	0.504553	0.483669
Hs.516494	1.05252	1.10518	1.14943	1.07305	1.06152	1.07837	1.05079	1.12493	1.10727
Hs.516656	1.0397	0.942622	0.99402	0.90892	0.984594	0.982124	0.920373	0.97431	0.98287
Hs.516700	0.34253	0.351556	0.296213	0.324598	0.290828	0.345539	0.313764	0.281607	0.331466
Hs.516726	0.418816	0.421696	0.416573	0.456123	0.392461	0.389634	0.365012	0.365964	0.37916
Hs.516966	1.03877	1.01252	0.943878	0.938522	0.887194	0.911337	0.891686	0.86048	0.896527
Hs.517034	1.16445	1.18218	1.00164	1.00998	0.946021	1.02785	1.10533	1.01513	0.893441
Hs.517070	0.197756	0.224213	0.212728	0.213827	0.176115	0.211302	0.199928	0.16895	0.209257
Hs.517145	0.252772	0.246182	0.19718	0.191885	0.159578	0.166186	0.136329	0.136573	0.15721
Hs.517581	0.372151	0.359345	0.262709	0.317266	0.231524	0.205097	0.164445	0.146815	0.182606
Hs.517586	0.577255	0.593589	0.571702	0.58746	0.545238	0.609357	0.646249	0.553054	0.570206
Hs.517729	0.604874	0.573797	0.579331	0.604278	0.553455	0.568758	0.629076	0.530138	0.561171
Hs.517792	0.688272	0.75308	0.68157	0.665198	0.724026	0.683178	0.699048	0.702123	0.668618
Hs.517939	1.68151	1.70502	1.54526	1.68042	1.76348	2.08219	2.17228	2.10441	1.95657
Hs.518198	0.855372	0.854933	0.79385	0.853528	0.846074	0.873294	0.808768	0.796339	0.793781
Hs.518267	0.0317833	0.0319708	0.032914	0.0337507	0.0306076	0.0356769	0.0371517	0.0319193	0.0395747
Hs.518438	0.186546	0.199221	0.183887	0.20613	0.152188	0.182887	0.174095	0.151115	0.170946
Hs.518450	0.746757	0.768186	0.812327	0.788379	0.809318	0.756737	0.831631	0.643361	0.755599
Hs.518726	1.01446	1.10469	1.08535	1.1322	0.978623	1.09876	1.01699	0.983196	1.03097
Hs.518774	0.352358	0.387035	0.445081	0.399576	0.356955	0.286598	0.269978	0.245227	0.270717
Hs.518805	0.317506	0.332205	0.308416	0.320066	0.286812	0.321897	0.318718	0.283774	0.322333
Hs.518808	0.347184	0.317835	0.303235	0.333417	0.278043	0.288794	0.269472	0.312579	0.298335
Hs.519033	0.908127	0.923596	0.898218	0.903034	0.886654	0.881055	0.882262	0.875935	0.871226
Hs.519057	0.313147	0.289992	0.257372	0.261442	0.256383	0.272238	0.252783	0.266572	0.255514
Hs.519385	2.12851	1.81183	1.38855	1.47545	1.43973	1.54113	1.44662	1.54466	1.64997
Hs.519469	1.0471	0.761244	0.896984	0.924972	1.02422	0.921572	0.979874	1.0146	0.946132
Hs.519601	0.317097	0.328672	0.302506	0.35128	0.347572	0.364647	0.319809	0.311154	0.322232
Hs.519719	0.743943	0.802241	0.729191	0.747381	0.730271	0.737126	0.78504	0.703859	0.730721
Hs.519880	0.727975	0.754968	0.74322	0.762219	0.72792	0.800995	0.779501	1.2027	1.03283
Hs.519909	2.40198	2.31919	2.97716	2.88577	3.04188	2.91946	3.3752	2.38011	2.37895
Hs.520028	1.08256	0.923007	0.64633	0.582281	0.457651	0.574648	0.640042	0.555955	0.667315
Hs.520048	0.912503	0.923014	0.894236	0.907013	0.858532	0.895638	0.877719	0.861586	0.892055
Hs.520140	1.60846	1.08336	0.891186	0.98819	0.984388	1.01488	1.01627	1.06412	1.31093
Hs.520205	0.762449	0.835856	0.854368	0.864513	0.896395	0.826768	0.867266	0.811543	0.903454
Hs.520414	1.05006	1.05507	1.57881	1.74089	1.81504	1.2264	1.44227	1.48906	1.53878
Hs.520421	0.535471	0.589191	0.546858	0.539186	0.525451	0.549477	0.518694	0.501205	0.470333
Hs.520640	1.48673	1.26808	1.02259	0.902859	0.775634	0.617291	0.523649	0.349287	0.55679
Hs.520757	1.2002	1.07907	1.00877	0.969991	1.05852	1.13595	1.09438	1.18828	1.41619
Hs.520819	0.9432	0.86347	0.849176	1.04984	1.18886	1.09076	1.38898	1.18598	0.769582
Hs.520937	0.968184	1.02476	0.961322	0.949401	0.944312	0.988391	0.94406	0.891723	0.923385
Hs.520973	0.215881	0.214461	0.190362	0.195013	0.166083	0.191459	0.183424	0.164453	0.176982
Hs.520989	24.2538	23.5558	20.0488	21.2851	26.2352	21.8879	21.291	32.6658	21.1833
Hs.521212	1.91629	1.94296	1.97211	2.01051	2.1782	2.66685	3.16637	2.81669	2.70245
Hs.521456	0.981438	0.92478	0.969043	1.0715	1.02057	1.02611	0.989075	0.824725	0.900049
Hs.521535	0.179817	0.171463	0.156482	0.168866	0.148874	0.162046	0.14455	0.142683	0.166704
Hs.521651	1.03257	1.04942	0.985482	1.00701	1.01839	0.959862	1.00921	1.00549	0.978517
Hs.522074	2.73165	2.3518	2.07651	2.17462	2.35049	2.80302	2.91081	2.93254	2.43022
Hs.522356	0.122184	0.132719	0.125168	0.134483	0.0940241	0.112444	0.109871	0.106164	0.114361
Hs.522373	1.27519	1.26584	1.25504	1.25819	1.30272	1.38368	1.44147	1.29105	1.24191
Hs.522413	0.939341	0.923899	0.942991	0.957354	0.905349	0.95852	1.01464	0.986107	1.02352
Hs.522632	0.65	0.636462	0.615771	0.597114	0.540753	0.513139	0.519171	0.340891	0.307959
Hs.522666	0.13927	0.142784	0.130498	0.145743	0.12738	0.149521	0.1447	0.136292	0.154536
Hs.522746	1.17956	1.10443	1.06858	1.12448	1.06057	1.05994	1.03888	1.07041	1.01797
Hs.522798	1.08655	1.17829	1.21454	1.12398	1.11522	1.10114	1.13856	1.06579	1.11322
Hs.522818	0.843409	1.02212	0.8839	0.982083	0.765729	0.999554	0.932059	0.834842	0.920349
Hs.522819	0.989592	1.02455	0.8283	0.772312	0.747703	0.79965	0.610518	0.53118	0.633654
Hs.522891	2.34286	2.42357	2.40227	2.51727	2.48804	2.91002	3.18167	3.02806	2.70045
Hs.523004	0.704346	0.705846	0.755876	0.814967	0.838828	1.02757	1.24357	1.04487	1.20779
Hs.523395	1.65636	2.10901	1.54838	1.70407	1.60013	2.47264	1.98466	2.43249	2.32407
Hs.523414	6.96225	6.77574	5.98267	6.61929	7.19991	8.71675	9.38492	12.6115	9.32603
Hs.523443	1.14488	1.15171	1.10899	1.11651	1.1067	1.09415	1.06223	1.0931	1.04544
Hs.523500	0.94614	0.993799	0.979212	0.983163	0.896334	0.9656	0.935953	0.928128	0.903959
Hs.523506	1.02668	1.08306	1.05597	1.09916	1.08618	1.11501	1.08865	1.11084	1.03664
Hs.523680	0.825647	0.811644	0.791453	0.77145	0.702359	0.753114	0.761404	0.611185	0.680798
Hs.523718	0.376072	0.401142	0.367906	0.383943	0.334607	0.3903	0.366171	0.337025	0.389377
Hs.523732	1.53026	1.74111	1.51522	1.67351	1.6351	2.19493	1.94823	1.6303	2.00934
Hs.523744	2.06294	2.21422	2.02124	2.1282	2.28825	2.12469	2.16963	2.46018	2.51621
Hs.523836	2.28962	2.14922	2.17867	2.23747	2.38682	2.49455	2.78927	2.08924	1.51311
Hs.523852	0.489913	0.478127	0.528514	0.498187	0.491031	0.409273	0.562115	0.47966	0.586574
Hs.523875	0.578599	0.537481	0.620052	0.588646	0.625212	0.635311	0.879198	0.575126	0.764299
Hs.524081	0.763953	0.746628	0.648074	0.636429	0.595585	0.665337	0.615687	0.464141	0.590296
Hs.524219	0.872279	0.889476	0.693799	0.708294	0.642561	0.772143	0.633084	0.679355	0.706107
Hs.524278	0.976594	1.0608	1.0217	0.975794	1.01255	1.01428	1.00721	1.04421	1.03924
Hs.524368	0.614476	0.599208	0.504069	0.521036	0.416277	0.460825	0.43694	0.417995	0.454104
Hs.524418	1.00687	1.0615	1.01591	0.989887	0.952486	1.00148	0.986733	0.93147	1.02872
Hs.524430	2.42169	0.854527	0.499522	0.415959	0.330903	0.29467	0.31893	0.36292	0.715449
Hs.524760	0.615415	0.63103	0.60651	0.596538	0.562067	0.63518	0.576402	0.583471	0.570739
Hs.524910	1.66524	1.71641	1.33772	1.50982	1.45832	1.87914	1.86358	1.90072	1.23882
Hs.525324	2.99023	2.92961	2.75851	3.04097	3.29796	4.00291	3.61412	3.21982	2.4474
Hs.525557	0.403833	0.425696	0.400933	0.405558	0.347559	0.382549	0.3718	0.380967	0.390616
Hs.525572	0.924593	0.709246	0.569227	0.583777	0.49611	0.514407	0.476051	0.458803	0.509629
Hs.527778	0.535799	0.559889	0.561545	0.597586	0.580211	0.664571	0.792072	0.584591	0.626535
Hs.527971	0.306579	0.305605	0.301774	0.30306	0.236782	0.293563	0.286159	0.207324	0.297196
Hs.527973	0.990636	1.05241	1.13575	1.15107	1.21607	1.41104	1.68485	1.54287	1.59778
Hs.528111	0.350927	0.492839	0.513021	0.554847	0.413871	0.535366	0.542438	0.451401	0.696027
Hs.528368	0.648865	0.638503	0.59627	0.609482	0.613237	0.626325	0.622222	0.655037	0.667907
Hs.528952	0.981765	1.02354	0.818817	0.81704	0.843221	1.01572	1.0758	0.951521	1.11679
Hs.529038	0.628846	0.668108	0.677167	0.67923	0.592668	0.592712	0.628649	0.535569	0.620109
Hs.529053	0.0434187	0.0555689	0.0602481	0.0681982	0.0419219	0.062214	0.0671506	0.0413129	0.0608814
Hs.529353	0.509175	0.538264	0.479149	0.533175	0.508645	0.575154	0.553204	0.478401	0.486438
Hs.529517	0.858986	0.996014	0.846835	0.87376	0.811723	0.81119	0.839862	0.762496	0.76522
Hs.529571	0.583215	0.618313	0.611004	0.620851	0.54105	0.65224	0.612674	0.590974	0.586582
Hs.529618	0.129309	0.125546	0.190305	0.184037	0.192222	0.136229	0.121012	0.107032	0.116783
Hs.529862	0.533884	0.576611	1.02911	0.988231	1.22539	0.821538	0.964789	1.19705	1.29424
Hs.530227	1.72613	1.57227	1.49862	1.45038	1.49786	1.69441	1.91026	1.82129	2.10659
Hs.530274	1.04641	1.04459	1.03218	1.08302	1.05786	1.03279	1.08317	1.01838	1.02242
Hs.530904	0.833497	0.913985	0.85177	0.917418	0.874309	0.80063	0.747026	0.777865	0.752996
Hs.531587	0.9524	0.907061	1.14941	1.07154	1.18273	1.06456	1.06763	1.04059	1.12912
Hs.531668	0.664364	0.677216	0.63245	0.673179	0.615425	0.624863	0.62925	0.608145	0.614745
Hs.531682	0.848338	0.87531	0.922174	0.886714	0.855871	0.854174	0.879059	0.817296	0.897475
Hs.531704	0.890289	0.902747	0.932978	0.848915	0.716111	0.617618	0.588542	0.494142	0.565063
Hs.532082	0.955013	0.884939	1.16126	0.987462	1.17892	1.00464	1.08993	1.07518	1.15599
Hs.532680	1.02685	1.00765	1.00181	1.0088	1.02511	1.00922	0.997432	1.00578	1.02966
Hs.532682	0.334381	0.386049	0.321787	0.311862	0.218801	0.281032	0.253994	0.331931	0.249117
Hs.532803	1.5476	1.45058	1.17715	0.966103	0.837152	1.10478	1.14565	0.845235	0.81493
Hs.533013	0.239534	0.239308	0.229337	0.229253	0.211159	0.228274	0.224897	0.211796	0.221012
Hs.533050	1.17697	1.2066	1.1328	1.11596	1.17047	1.15202	1.20418	1.08972	1.09107
Hs.533258	0.99793	1.02067	0.993237	0.977112	1.00633	1.04756	1.09537	1.00913	1.02997
Hs.533357	1.15625	1.15737	1.18533	1.08097	1.22803	1.18285	1.33806	1.31813	1.26025
Hs.533432	0.896911	0.899995	0.795791	0.775462	0.846719	0.890874	0.885784	1.00274	0.870352
Hs.533566	5.86261	7.90929	3.79732	4.55311	3.92654	6.99169	4.69817	9.53993	7.75426
Hs.534206	0.369287	0.336566	0.317239	0.342214	0.294984	0.313343	0.271396	0.325032	0.297231
Hs.534293	0.33234	0.361192	0.32502	0.34574	0.316129	0.346545	0.339126	0.317106	0.342482
Hs.534307	2.17104	2.06575	1.58392	1.3936	1.28973	1.40146	1.3624	1.35466	1.5412
Hs.534313	0.791529	0.607753	0.598518	0.604013	0.554453	0.576461	0.584328	0.52853	0.729501
Hs.534322	0.760351	0.798104	0.75476	0.787694	0.734513	0.726423	0.736685	0.708376	0.789533
Hs.534332	0.799028	0.823477	0.75134	0.819918	0.762292	0.774984	0.727083	0.717283	0.73918
Hs.534334	0.676571	0.581315	0.425714	0.362751	0.322679	0.35341	0.361681	0.301926	0.459077
Hs.534404	0.5139	0.515963	0.454925	0.446678	0.434454	0.505512	0.507652	0.514777	0.562249
Hs.534770	0.24985	0.259496	0.216541	0.223895	0.194581	0.221871	0.189603	0.168936	0.176643
Hs.535845	1.03607	1.04601	0.900605	0.898189	0.86399	0.867899	0.841758	0.852233	0.873519
Hs.535901	0.530218	0.493687	0.54629	0.415038	0.356779	0.254437	0.31628	0.19728	0.339906
Hs.536663	1.21391	1.20671	1.25286	1.20377	1.20126	1.15855	1.19263	0.870206	0.72369
Hs.53973	1.07197	1.11113	1.05514	1.06924	1.0139	1.06851	1.13209	1.00225	1.04831
Hs.544577	0.181199	0.163679	0.175935	0.170073	0.157498	0.172188	0.160169	0.118377	0.11149
Hs.54473	0.718891	0.687196	0.642496	0.608146	0.644305	0.644181	0.646501	0.669724	0.645177
Hs.546255	0.0353567	0.0372438	0.0351998	0.0356941	0.0283247	0.0347734	0.0340947	0.0333365	0.0366408
Hs.546270	1.07492	1.08585	1.07389	1.10303	1.02316	1.05484	1.04981	1.0675	1.05465
Hs.546294	0.972274	1.07779	0.995797	0.972257	0.96295	0.965708	1.01226	0.961594	1.0296
Hs.546407	0.82768	0.825382	1.09466	0.98283	1.11987	0.978587	0.962068	0.99074	0.956196
Hs.546439	0.545809	0.558195	0.567633	0.622808	0.513337	0.625378	0.725168	0.614399	0.660638
Hs.54780	0.484444	0.52342	0.626766	0.629644	0.659482	0.568659	0.619885	0.635765	0.631012
Hs.549053	2.65674	2.70722	2.3783	2.4421	2.53949	2.72053	2.86298	3.04832	2.62609
Hs.551713	0.718264	0.700421	0.702217	0.720442	0.677704	0.681504	0.69688	0.687133	0.686007
Hs.55279	0.754599	0.782813	0.727589	0.730582	0.711375	0.738217	0.716648	0.726124	0.746392
Hs.553160	0.950802	0.946938	0.929489	0.926365	0.841454	0.872937	0.866951	0.828	0.852004
Hs.554740	0.516546	0.489739	0.554557	0.520456	0.537747	0.439766	0.451399	0.374387	0.372954
Hs.554822	1.1016	1.10117	1.08738	1.04043	1.05581	1.05163	1.07105	1.1402	1.06121
Hs.557	1.20487	1.21807	0.848223	0.903309	1.06451	1.43526	1.22348	1.2157	1.25335
Hs.557550	0.541963	0.565366	0.724284	0.73902	0.779187	0.729354	0.702877	0.840875	0.700372
Hs.558308	0.745744	0.616696	0.668223	0.67037	0.60745	0.590468	0.716257	0.497578	0.762267
Hs.558314	0.0876087	0.0978569	0.0954688	0.0979489	0.0731029	0.0891855	0.082378	0.0704343	0.0896391
Hs.558318	0.748386	0.761437	0.771711	0.748071	0.736456	0.720228	0.684958	0.673977	0.693458
Hs.558334	0.927249	0.908499	0.716874	0.767279	0.770712	0.911965	0.855642	1.17578	0.891538
Hs.558396	0.243348	0.235747	0.169951	0.160931	0.147833	0.183393	0.235052	0.220563	0.137857
Hs.558950	0.976042	0.985561	0.906316	0.946252	0.935741	0.939653	0.958855	0.974211	1.02089
Hs.563344	0.637075	0.658108	0.632382	0.684635	0.646381	0.613271	0.575394	0.62554	0.598071
Hs.567245	1.04115	1.05653	1.0082	1.04617	1.06265	1.02692	1.00632	1.06911	1.05318
Hs.567252	1.13253	1.25184	1.13691	1.07797	1.18144	1.1564	1.16246	1.15837	1.16153
Hs.567280	1.05277	1.00208	0.999643	1.04732	1.01665	0.990209	0.992216	1.00442	1.01182
Hs.567303	0.865963	0.868014	1.03623	0.99321	1.00194	0.924417	0.938066	0.91336	0.882981
Hs.567319	0.500959	0.521367	0.797281	0.765143	0.77852	0.647242	0.65675	0.609065	0.583348
Hs.567641	1.10214	1.15713	1.11529	1.08766	1.1452	1.10409	1.12489	1.24271	1.14195
Hs.570791	1.35898	1.65994	1.72237	1.69585	1.53725	1.22228	1.19904	1.5152	1.75179
Hs.570855	0.471359	0.482496	0.474892	0.489634	0.450101	0.481753	0.472718	0.460997	0.464631
Hs.571037	0.807408	0.83729	0.619	0.58667	0.519103	0.562153	0.612123	0.673572	0.485508
Hs.571841	0.360886	0.379844	0.44867	0.436407	0.48682	0.454926	0.473958	0.59501	0.542745
Hs.573143	0.609811	0.592741	0.828683	1.01891	1.22976	1.03022	1.09593	1.10447	1.07265
Hs.573153	0.23802	0.247691	0.238081	0.244913	0.210068	0.241464	0.220113	0.19926	0.232253
Hs.574026	1.0596	1.05485	1.00536	1.03182	0.996031	1.02555	1.0181	1.05095	1.1155
Hs.575083	0.79202	0.766617	0.681865	0.687339	0.687373	0.66927	0.605599	0.691976	0.626424
Hs.575782	1.03848	0.928829	1.97335	1.82518	2.24395	1.90977	2.07892	2.32614	2.29416
Hs.581632	0.96542	0.647818	0.960631	0.929207	1.29771	0.973225	1.18475	0.95049	1.10379
Hs.584801	1.23781	1.2255	1.20924	0.999537	0.889005	0.693737	0.617193	0.567531	1.05948
Hs.584804	0.961985	1.00602	0.946014	0.942271	0.961149	1.01425	1.01469	0.95832	1.01249
Hs.584823	0.917657	0.97559	0.959939	1.02443	1.15901	1.27095	1.2713	1.39497	1.05354
Hs.584884	0.599151	0.62199	0.890631	0.859113	0.88892	0.720802	0.731558	0.772538	0.845601
Hs.585357	0.0573731	0.0567847	0.0574789	0.061783	0.0536682	0.0621719	0.0667221	0.0589836	0.0635718
Hs.58756	3.08657	2.27111	1.2	1.45293	1.39694	1.80509	1.75371	2.65815	3.51752
Hs.588289	1.23171	1.28663	1.11008	1.24713	1.21958	1.16144	1.1919	1.3101	1.3486
Hs.58974	1.48005	1.57751	1.7522	1.87316	1.82461	2.15658	1.80563	1.59818	0.723878
Hs.590872	1.70219	1.54856	1.50769	1.56221	1.56065	1.51853	1.46441	1.45884	1.67259
Hs.590892	3.88259	3.15411	3.47129	3.21342	4.65316	3.8506	4.1563	4.5615	3.90408
Hs.590921	0.52763	0.516786	0.495901	0.493704	0.434322	0.459587	0.439659	0.419344	0.463536
Hs.591148	1.06884	1.10407	1.06901	1.05467	1.03728	1.02812	1.03987	0.989222	1.10181
Hs.591159	1.21398	1.22095	1.07092	1.02838	1.01226	0.96992	1.00781	0.987126	1.0161
Hs.591241	0.779186	0.747175	1.0061	0.876245	1.01026	0.94001	0.917384	1.0036	1.07017
Hs.591251	0.775255	0.793723	0.690237	0.707403	0.636965	0.714252	0.724276	0.699388	0.871875
Hs.591336	2.2301	2.87615	4.75962	4.89526	4.73105	4.35423	4.11571	4.97705	4.16445
Hs.591346	8.19634	3.21276	2.16715	2.65761	1.77873	1.04321	0.884973	1.03453	1.18014
Hs.59138	1.92088	1.82571	1.54906	1.43866	1.4652	1.76019	1.79391	1.6079	1.82779
Hs.591382	1.11713	1.19638	1.00513	1.09261	1.11683	1.36671	1.31683	1.54933	1.31651
Hs.591400	0.795193	0.845906	0.807744	0.860545	0.790959	0.878332	0.931473	0.764435	0.915313
Hs.591402	0.956046	0.962343	0.982231	0.957881	0.971408	0.976273	0.983116	0.871371	0.906729
Hs.591430	1.00616	1.0624	1.25442	1.30281	1.26591	1.55043	1.32684	2.09375	1.77199
Hs.591484	0.783064	0.803754	0.767171	0.77023	0.768499	0.809652	0.782331	0.773984	0.767592
Hs.591486	0.971819	0.972666	0.884494	0.93406	0.916514	0.931045	0.919957	0.915831	0.901374
Hs.591588	0.262865	0.248188	0.211881	0.224087	0.189244	0.203245	0.178871	0.171222	0.203854
Hs.591654	1.0763	1.05779	1.01645	1.06647	1.03825	1.09045	1.05051	1.0335	1.09671
Hs.591742	0.360925	0.370237	0.374594	0.374086	0.317237	0.352714	0.339811	0.326851	0.341874
Hs.591802	1.08389	1.0083	1.04862	1.07519	1.01312	0.934931	0.961624	1.00188	0.936412
Hs.591834	0.715444	0.660682	0.631682	0.672201	0.624837	0.651617	0.636536	0.521341	0.553385
Hs.591847	1.50847	1.41321	1.36912	1.29988	1.46977	1.28106	1.17198	1.25203	1.17836
Hs.591890	1.09028	1.09983	1.15161	1.13741	1.22568	1.28229	1.32854	1.17399	1.13894
Hs.591928	0.984711	1.03351	1.05809	1.06109	0.979252	1.0529	1.06496	0.997199	1.0867
Hs.591940	0.981444	1.00333	0.976938	0.985175	0.972085	1.00409	0.981664	0.98219	1.04563
Hs.591944	1.35446	1.36581	1.28882	1.36291	1.23391	1.31201	1.38736	1.11664	1.4033
Hs.591945	0.942912	0.881361	0.88828	0.918877	0.952287	0.987144	1.04136	1.01277	1.00611
Hs.591969	1.01468	0.991275	1.0354	0.997485	0.967218	0.987968	0.979148	0.926841	0.993164
Hs.591980	0.60299	0.657633	0.662271	0.646123	0.63928	0.643917	0.630138	0.603844	0.635974
Hs.591983	1.39197	1.26858	1.54018	1.64096	1.51468	1.37937	1.42305	1.6319	1.63431
Hs.591993	1.23608	1.61048	1.42804	1.50623	1.38798	1.67276	1.67591	1.08442	1.67381
Hs.592049	1.08501	1.07744	0.995289	1.01866	0.917698	1.24405	1.26687	0.845111	0.398049
Hs.592123	0.620802	0.580614	0.615171	0.580069	0.595249	0.666231	0.723466	0.500452	0.460087
Hs.592130	0.671404	0.699047	0.648556	0.673314	0.60609	0.64473	0.649884	0.595521	0.64436
Hs.592166	0.670074	0.682772	0.631769	0.68569	0.637414	0.625947	0.640956	0.591418	0.662742
Hs.592227	1.17691	1.14684	1.18524	1.15885	1.2229	1.15666	1.1446	1.16642	1.17662
Hs.592244	1.0699	1.0311	0.989933	1.04176	1.02597	1.00309	0.979931	1.01845	1.00163
Hs.592290	1.0822	1.08043	1.37557	1.37495	1.53094	1.46744	1.86083	1.06702	1.08195
Hs.592317	1.38766	1.36299	1.28114	1.20937	1.34951	1.26871	1.18962	1.14878	1.15334
Hs.592324	0.998409	1.08636	1.03354	1.10246	1.10519	1.05477	1.03525	1.09616	1.17006
Hs.592338	1.41323	1.5828	1.34838	1.43192	1.27407	1.93549	1.42756	1.18338	0.782347
Hs.592490	1.12598	1.21311	1.05826	0.96265	0.897931	0.820013	0.742975	0.806465	0.846387
Hs.593413	0.143197	0.107223	0.0791807	0.0797381	0.0602154	0.0683927	0.0669378	0.0636989	0.0773751
Hs.593928	0.388483	0.379554	0.338224	0.382717	0.380532	0.459913	0.556499	0.504782	0.372492
Hs.594444	0.331801	0.279392	0.352433	0.317654	0.331074	0.323253	0.38814	0.203594	0.177707
Hs.594481	0.189138	0.203309	0.18268	0.211177	0.154688	0.198986	0.189574	0.1572	0.204156
Hs.597656	0.775472	0.785782	0.973689	0.907276	1.00855	0.818102	0.711527	0.797524	0.786505
Hs.59889	1.1776	1.1675	1.15027	1.2368	1.12637	1.11994	1.08698	1.07822	1.1394
Hs.602898	0.988027	0.993947	0.822488	0.798776	0.75385	0.857212	0.865925	0.734356	0.864627
Hs.610926	1.44081	1.449	1.12799	1.17252	1.31723	1.49044	1.34544	1.7105	1.49635
Hs.62192	3.55913	1.74776	1.72103	1.72023	1.44162	0.80338	0.891974	0.824674	1.08718
Hs.622865	0.102935	0.113892	0.105591	0.112187	0.0829923	0.102468	0.100828	0.0826268	0.103266
Hs.624	0.20888	0.19331	0.164477	0.175796	0.147113	0.154463	0.134998	0.226023	0.142463
Hs.62492	1.14436	1.14851	1.04438	1.0733	1.07875	1.18535	1.26031	1.17318	1.11305
Hs.62880	1.0449	1.10607	1.08213	1.05289	1.02942	1.04432	1.05264	1.06833	1.07177
Hs.631513	1.09159	1.00465	1.09004	1.10232	1.28409	0.989277	1.11756	1.217	1.14023
Hs.631535	0.975144	0.980174	0.98937	0.963742	0.9698	0.998495	1.10597	0.901799	0.988147
Hs.631546	1.39396	1.47887	1.41864	1.56907	1.77929	2.55358	2.52768	1.87829	1.61632
Hs.631567	0.555554	0.514927	0.400312	0.389717	0.43317	0.44977	0.446818	0.600854	0.444441
Hs.631624	0.955703	1.01649	0.996601	1.02454	1.02203	1.14331	1.09582	0.950332	0.904664
Hs.631659	0.836268	0.774989	0.582993	0.590329	0.699032	0.787471	0.766155	0.968472	0.823799
Hs.631726	1.04858	0.994452	1.00423	1.05871	1.02734	1.02063	0.992196	1.01173	1.02118
Hs.631886	0.530591	0.493035	0.560184	0.583249	0.643121	0.580505	0.586998	0.559995	0.577008
Hs.632054	1.03662	0.966267	0.964926	1.01499	1.04409	0.993863	1.00698	1.02723	1.03891
Hs.632099	1.75044	1.57147	1.42942	1.43556	1.35739	0.982668	0.851014	0.607935	0.566283
Hs.632119	1.1491	1.23164	1.18715	1.1542	1.17764	1.18818	1.17329	1.16481	1.15342
Hs.632137	0.713207	0.687463	0.608911	0.617604	0.55791	0.599568	0.563453	0.549742	0.564543
Hs.632144	0.987847	0.924835	0.923299	1.0164	0.938608	1.00213	0.950225	0.912325	0.944591
Hs.632179	0.451106	0.500618	0.448084	0.453951	0.407671	0.452051	0.456243	0.462476	0.584734
Hs.632188	0.998173	1.06523	0.989312	1.01417	0.956286	1.00603	1.01262	0.969178	1.10244
Hs.632221	1.19643	1.21366	1.12273	1.14356	1.19068	1.16334	1.13382	1.18905	1.14989
Hs.632235	1.05532	1.04099	1.04332	1.05096	1.04248	1.05718	1.03437	1.03748	1.11094
Hs.632324	1.02766	1.0028	0.971165	0.976308	0.986184	1.05774	1.0626	1.0175	1.06859
Hs.632402	1.01897	1.07352	0.987192	1.02729	0.998331	1.06402	1.01467	1.08094	1.06625
Hs.632436	1.22685	1.1486	1.11597	1.21573	1.12436	1.06877	1.09624	1.04171	1.09691
Hs.632466	11.0481	11.8883	13.113	13.4283	14.4059	13.9709	15.6444	13.0341	9.99482
Hs.632540	1.24006	1.31423	1.58301	1.5161	1.54978	1.27165	1.37039	1.39147	1.45822
Hs.632642	0.96541	0.976507	0.917926	0.955224	0.899661	0.947849	0.921661	0.957009	0.912599
Hs.632702	0.975188	0.913965	0.806306	0.88786	0.998765	1.24468	0.851822	0.766322	0.468388
Hs.632733	2.43983	2.78319	2.4437	2.75642	3.13383	4.77484	5.48487	6.86938	5.95831
Hs.632790	1.24146	1.29301	1.18248	1.14718	1.19403	1.04736	1.06012	0.966109	0.971378
Hs.633003	0.0993524	0.104355	0.0968496	0.101052	0.0882906	0.10338	0.103123	0.0943677	0.102964
Hs.634632	0.680998	0.698911	0.7253	0.703142	0.736863	0.782452	0.844683	0.674305	0.882162
Hs.6347	1.24627	1.23984	1.32215	1.30168	1.38774	1.41112	1.52779	1.27875	1.41355
Hs.63489	0.664958	0.669522	0.641203	0.654318	0.641924	0.70954	0.70048	0.640525	0.64892
Hs.635441	0.720543	0.668448	0.629416	0.664621	0.612841	0.629662	0.64818	0.491668	0.40614
Hs.64016	0.363433	0.395617	0.420098	0.413952	0.346988	0.422657	0.384129	0.36886	0.414752
Hs.642813	0.390796	0.377165	0.405078	0.414529	0.396974	0.404051	0.458931	0.389439	0.27773
Hs.642938	0.0136636	0.0163135	0.0164815	0.0168032	0.0113178	0.0150965	0.0148682	0.0118448	0.0151237
Hs.642966	1.21306	1.13602	1.4224	1.34354	1.38972	1.07989	1.03297	1.23418	1.21892
Hs.643030	0.613426	0.751023	0.981592	1.14247	1.29281	1.05629	1.34324	1.44585	1.02856
Hs.643357	3.07455	3.58757	3.53495	3.60571	2.93552	2.53654	2.11238	2.32129	1.68112
Hs.643447	0.300934	0.327198	0.309627	0.316581	0.256607	0.288267	0.277474	0.272089	0.275881
Hs.643487	1.24852	1.24162	1.16105	1.14863	1.10002	1.23935	1.37951	1.31734	1.41706
Hs.644610	1.61117	1.49377	1.47962	1.7044	1.79494	2.04576	2.24592	2.15348	2.2194
Hs.644653	1.09273	1.01531	1.32766	1.30948	1.49564	1.21028	1.42754	1.36194	1.46627
Hs.645224	1.05654	1.02469	1.09654	1.07567	1.12897	1.17715	1.06065	1.1045	1.09515
Hs.645227	0.727997	0.718863	0.704873	0.707777	0.700688	0.766152	0.809971	0.673566	0.771061
Hs.645228	1.00108	1.0556	1.02659	1.00914	1.08463	1.03404	1.04236	1.0431	1.03849
Hs.645535	0.723938	0.789293	0.705963	0.686075	0.657838	0.738911	0.776764	0.731119	0.812546
Hs.646	1.15599	1.23101	1.15445	1.16046	1.23489	1.24967	1.21264	1.21939	1.17725
Hs.647047	1.05145	1.04599	1.00415	1.00316	0.982146	1.04407	1.02886	1.01443	0.986127
Hs.647055	0.470711	0.478346	0.452068	0.453611	0.419694	0.454426	0.483687	0.458523	0.556609
Hs.647061	3.78113	3.7332	3.47374	3.72033	5.01782	5.76105	7.14207	6.71136	6.13449
Hs.647078	1.78707	1.7056	1.6395	1.56784	1.54318	1.86993	1.7455	1.45025	1.26468
Hs.647092	1.10517	1.12542	1.11783	1.09518	1.08905	1.10679	1.08738	1.06132	1.08926
Hs.647156	1.58963	1.61029	1.61756	1.5533	1.5245	1.66175	1.80472	1.26452	0.577036
Hs.647371	0.0686807	0.0683697	0.0673374	0.0733147	0.0688994	0.0913979	0.0933768	0.0658758	0.0475044
Hs.647389	1.1072	1.09428	0.987039	0.975158	1.06213	1.13878	1.06991	1.08662	1.11985
Hs.647419	0.474523	0.483675	0.491303	0.50279	0.43471	0.457446	0.47384	0.452809	0.472638
Hs.647430	1.39714	1.28556	1.33533	1.32222	1.44181	1.40256	1.49321	1.51925	1.34436
Hs.647623	0.703746	0.658125	0.647353	0.672508	0.616986	0.639937	0.621344	0.679597	0.634254
Hs.648256	1.16179	1.25712	1.14134	1.14268	1.09985	1.19061	1.16916	1.20958	1.17094
Hs.648635	1.48827	1.69523	1.746	1.81438	1.73593	1.52824	1.20917	1.14165	1.03588
Hs.649191	1.33332	1.37078	1.30786	1.36728	1.3328	1.37191	1.22366	1.19207	1.32263
Hs.652262	0.916118	0.950719	0.895016	0.893932	0.858333	0.861627	0.909876	0.860901	0.860585
Hs.652366	1.08607	1.07611	1.04468	1.08989	1.10363	0.979996	1.03658	1.03373	1.01779
Hs.653135	0.604375	0.65853	0.896578	1.02177	1.05002	0.826524	0.914571	1.04338	1.01171
Hs.65425	1.1927	1.22867	1.42744	1.49889	1.71677	1.75073	1.70841	1.66325	0.980173
Hs.654360	2.57358	2.50215	2.8681	2.96983	2.93478	1.8648	1.72539	1.92415	1.48782
Hs.654368	0.984199	0.982304	0.965867	0.934621	0.895115	0.914715	0.913388	0.936155	0.951577
Hs.654370	0.250417	0.261227	0.295607	0.283221	0.262718	0.258187	0.264361	0.26424	0.226914
Hs.654380	1.04487	1.02133	0.896618	0.930019	1.00695	0.985301	0.943412	1.03572	0.961625
Hs.654385	1.16528	1.24339	1.13802	1.09575	1.10843	1.14432	1.20509	1.11229	1.1823
Hs.654390	1.13214	1.13972	1.08071	1.09631	1.15585	1.19408	1.21642	1.15801	1.21524
Hs.654391	0.799644	0.843548	0.789236	0.819645	0.834814	0.868756	0.825669	0.868453	0.866024
Hs.654393	2.69209	2.74398	2.50378	2.50039	2.3374	2.51492	1.97643	1.2551	1.24536
Hs.654394	1.03977	0.973595	0.94942	0.962752	0.919349	0.910164	0.91964	0.9793	0.907763
Hs.654399	1.1747	1.18969	1.11559	1.15312	1.21047	1.23924	1.28426	1.20693	1.22362
Hs.654403	0.926394	1.01938	0.930522	0.966351	0.985197	0.924051	1.00896	0.932455	0.92655
Hs.654408	2.46525	2.20449	1.77615	1.71021	1.71529	2.06128	2.04187	2.18367	2.73162
Hs.654410	1.2111	1.17062	1.15082	1.17426	1.15635	1.09873	1.11754	1.1739	1.11551
Hs.654419	1.15103	1.11218	1.19754	1.15138	1.09369	1.13887	1.10646	1.22554	1.17096
Hs.654424	0.252459	0.234405	0.199007	0.220844	0.173243	0.206723	0.190421	0.217307	0.194725
Hs.654430	1.03536	1.043	1.0466	1.0725	1.00154	1.06252	1.03257	1.00594	1.00319
Hs.654433	1.05782	1.07913	1.08957	1.06703	1.07449	1.07203	1.04195	1.02171	1.05003
Hs.654434	0.93872	0.921145	0.872009	0.921325	0.933297	0.918563	0.894214	0.96231	0.946831
Hs.654436	1.16548	1.05763	1.04682	1.12781	1.0786	1.0226	1.07288	1.03782	1.056
Hs.654439	0.175999	0.190558	0.154889	0.178488	0.157302	0.215272	0.193609	0.210306	0.209073
Hs.654444	0.0903423	0.0951306	0.0905821	0.0978468	0.0869478	0.102352	0.11692	0.093771	0.0837554
Hs.654446	0.0943361	0.100197	0.110108	0.102104	0.074135	0.0867497	0.0744278	0.0934079	0.131778
Hs.654447	0.509663	0.547159	0.529697	0.581214	0.571214	0.686401	0.827332	0.549144	0.509386
Hs.654450	1.09707	1.1293	1.11003	1.15604	1.18875	1.24751	1.28319	1.36976	1.22222
Hs.654455	0.924755	0.95422	0.765622	0.825147	0.812801	0.994254	0.877492	1.07774	1.07983
Hs.654458	3.89792	2.49544	1.98783	2.27091	2.35943	1.8091	1.84941	2.0369	2.58366
Hs.654464	1.12131	1.19321	1.25834	1.0965	1.16276	1.14307	1.13968	1.14209	1.12941
Hs.654465	1.1903	1.34047	1.95759	2.17861	2.3128	1.4842	1.4801	1.69244	1.93913
Hs.654466	1.43259	1.39186	1.24446	1.28675	1.33543	1.47655	1.67434	1.51345	1.36377
Hs.654472	0.462224	0.438638	0.403606	0.40594	0.372479	0.41529	0.356814	0.409193	0.389776
Hs.654473	0.623689	0.634728	0.618682	0.652769	0.550103	0.552729	0.543805	0.537933	0.583674
Hs.654479	0.97548	0.980569	0.942134	0.876256	0.958549	0.930151	0.932027	0.996992	0.940658
Hs.654481	0.836075	0.816993	0.841173	0.790392	0.811082	0.803448	0.824471	0.628175	0.646749
Hs.654484	5.05468	4.71781	3.31283	3.83245	4.26848	4.19389	3.68998	4.92755	4.68146
Hs.654490	0.670453	0.709888	0.698448	0.699153	0.771048	0.862	0.952702	0.853216	0.804787
Hs.654491	1.28158	1.30439	1.90396	2.04005	2.38363	1.79491	1.73791	1.86099	1.83707
Hs.654510	1.04207	1.14239	1.14581	1.12898	1.05238	1.18056	1.18002	1.11815	1.17582
Hs.654514	0.480911	0.506934	0.491206	0.510427	0.453406	0.477757	0.446777	0.43744	0.446471
Hs.654515	1.06732	1.02472	1.0609	1.06756	1.04699	1.09561	0.985555	1.02124	1.0761
Hs.654522	0.88058	0.94672	0.899239	0.871597	0.862121	0.894721	0.901642	0.833653	0.886699
Hs.654532	0.989451	1.03504	1.18014	1.08369	1.06042	0.971354	0.986754	1.04522	0.863052
Hs.654533	1.15132	1.04926	1.16139	1.07055	1.31363	1.29315	1.30057	1.40533	1.35357
Hs.654536	0.14999	0.15749	0.143493	0.148636	0.136641	0.184351	0.232758	0.233921	0.328799
Hs.654537	1.17303	1.30037	1.21748	1.20276	1.27346	1.20109	1.18251	1.24314	1.24794
Hs.654541	1.75882	1.81955	1.69568	1.63654	1.64771	1.77445	1.95577	2.10764	2.0055
Hs.654542	0.624538	0.599392	0.58357	0.603652	0.548805	0.578303	0.568549	0.509901	0.546597
Hs.654544	0.911699	1.16899	1.00288	1.1633	0.838975	1.0699	1.0074	1.01045	1.01738
Hs.654583	1.58148	1.28469	1.00893	1.2683	1.34194	1.50694	1.66499	1.77234	1.69145
Hs.654585	1.04128	1.15326	1.13552	1.15889	0.979068	1.29413	1.31428	1.30599	1.26033
Hs.654591	1.77346	1.89472	1.69336	1.61707	1.84542	1.72403	1.78737	1.7211	2.07836
Hs.654600	0.305434	0.271596	0.381567	0.355046	0.373637	0.292916	0.309544	0.33811	0.333365
Hs.654758	2.13033	2.40004	1.97001	2.04727	2.02708	2.45836	2.31393	1.98055	2.05417
Hs.654798	1.21051	1.1745	1.16194	1.17706	1.13108	1.13973	1.16005	1.12768	1.22968
Hs.654894	0.24435	0.258311	0.297318	0.285846	0.281831	0.227975	0.240312	0.226412	0.243107
Hs.654978	0.350282	0.342348	0.369213	0.361462	0.339726	0.3255	0.300947	0.324819	0.311915
Hs.654981	0.793847	0.765171	0.966214	0.929764	0.94775	0.977386	0.942529	1.06385	1.03911
Hs.655148	0.535587	0.506322	0.585075	0.564476	0.493673	0.528121	0.565068	0.482473	0.558698
Hs.655151	0.242077	0.235738	0.161587	0.189465	0.184719	0.25705	0.240454	0.419984	0.281585
Hs.655160	0.825264	0.84295	0.80642	0.8275	0.724964	0.812936	0.769878	0.72901	0.812541
Hs.655195	0.0543757	0.0629421	0.0589468	0.0630537	0.0486142	0.0623793	0.061405	0.0497636	0.0638275
Hs.655199	0.2301	0.275067	0.290468	0.29263	0.229463	0.353149	0.372027	0.217191	0.29266
Hs.655207	0.113865	0.120613	0.11471	0.119315	0.103906	0.116454	0.115003	0.103922	0.11469
Hs.655218	0.51159	0.508905	0.517919	0.553272	0.479803	0.534838	0.495765	0.43367	0.508727
Hs.655222	1.28556	1.17397	0.847248	0.872117	1.06585	1.18617	1.06962	1.69884	1.12437
Hs.655229	1.08758	1.112	1.0549	1.04555	1.0992	1.07452	1.13866	1.1148	1.12383
Hs.655331	0.75037	0.745021	0.849181	0.795663	0.754035	0.63453	0.629357	0.499671	0.627394
Hs.655334	1.01999	0.8338	0.832062	0.953158	0.963765	1.10037	1.31427	1.18633	1.44981
Hs.655423	1.19049	0.992382	1.00371	1.06624	0.992794	1.138	1.07304	1.04707	1.05446
Hs.655516	1.02182	1.04329	1.00341	1.05682	0.989559	1.02965	0.976518	1.0545	1.01086
Hs.655782	0.437466	0.465792	0.545811	0.506389	0.518682	0.499117	0.492694	0.562388	0.449581
Hs.655801	1.06523	1.07172	0.990488	1.01397	1.03214	1.08399	1.20297	1.25429	1.21886
Hs.655983	0.460448	0.436207	0.500327	0.4989	0.537682	0.477958	0.546518	0.56645	0.488042
Hs.656047	2.31266	1.43647	1.02724	0.999544	0.884124	0.973702	0.847573	0.931065	0.932161
Hs.656214	0.935435	0.910539	1.0111	1.1686	1.41834	1.96814	2.16749	1.649	0.843551
Hs.656261	1.10087	0.98274	1.05617	1.04905	1.05975	1.03039	1.03898	0.931911	1.01444
Hs.656544	0.459265	0.464421	0.435298	0.482262	0.402141	0.446589	0.428627	0.359146	0.449373
Hs.656567	0.29066	0.294429	0.296709	0.305141	0.272797	0.304102	0.29955	0.209241	0.265693
Hs.656937	0.844643	0.784703	0.885688	0.878535	0.922746	0.879979	0.925197	0.909897	0.96198
Hs.656980	6.17924	6.49471	5.19232	5.61446	5.78512	7.59665	7.92075	9.92111	7.17551
Hs.65734	0.63627	0.693207	0.925711	1.06109	1.09738	0.865299	0.812203	0.954567	1.01669
Hs.657724	2.31634	2.24729	2.93049	2.45758	2.96222	2.45053	2.55758	2.70083	2.08352
Hs.657729	1.04079	0.977963	1.05664	0.959269	0.954406	1.21631	1.08498	0.977532	0.981568
Hs.658120	0.982016	1.00913	1.06437	0.961188	0.943025	1.0469	1.03591	1.09926	1.1697
Hs.658439	1.15192	1.09292	1.11691	1.16375	1.16574	1.08958	1.11237	1.14151	1.0728
Hs.658487	1.03726	1.06774	1.06868	1.02125	1.12338	1.07104	1.00675	1.05	1.01738
Hs.658534	0.964968	1.14364	0.975904	1.03766	0.93092	1.05591	1.01137	1.28683	1.12325
Hs.658573	1.38251	1.59082	1.31111	1.36064	1.29355	1.75726	1.57747	1.94461	1.76566
Hs.658850	1.00608	0.989486	0.940748	1.01324	0.962734	0.99126	0.969791	0.940789	0.961454
Hs.659337	0.895303	0.784974	0.809166	0.830334	0.868813	0.962606	0.944612	0.966596	0.86385
Hs.659516	0.985024	1.03314	1.00305	1.07684	1.07833	1.14735	1.04198	1.16896	1.05371
Hs.659889	0.790226	0.824219	0.827432	0.814245	0.786211	0.795533	0.783958	0.724294	0.80221
Hs.660362	1.1329	1.12313	1.11523	1.14027	1.10383	1.07248	1.0695	1.07237	1.05196
Hs.661017	1.14502	1.15386	1.08557	1.15921	1.15496	1.09323	1.09593	1.09535	1.16678
Hs.661104	1.18261	1.17396	1.21555	1.18988	1.18775	1.16613	1.20137	1.20571	1.1463
Hs.661219	1.04158	1.13206	1.06607	1.02465	1.10466	1.07335	1.07382	1.08619	1.08184
Hs.661360	0.459144	0.496429	0.469114	0.459809	0.430249	0.426267	0.418391	0.465194	0.424103
Hs.662050	1.02191	1.04671	1.05273	1.01697	1.03544	1.0557	1.03181	1.02229	1.01119
Hs.663679	1.20645	1.23273	1.16	1.14488	1.21419	1.30652	1.22471	1.1775	1.20014
Hs.664011	0.81142	0.835325	0.801715	0.79907	0.792701	0.8255	0.868383	0.775576	0.826577
Hs.664500	0.942765	0.903323	0.869192	0.90095	0.903519	0.898092	0.910624	0.941534	0.896222
Hs.664706	0.876301	0.87991	0.785303	0.798958	0.844128	0.81322	0.800899	0.823266	0.897577
Hs.66744	2.00605	1.63628	1.31725	1.48065	1.57385	1.73822	1.61632	1.59222	1.70792
Hs.667720	1.08173	1.10785	1.04517	1.06225	1.06667	1.04542	1.02355	1.03573	1.15069
Hs.670866	0.662135	0.616148	0.638209	0.670549	0.66187	0.572552	0.689698	0.584239	0.570797
Hs.673	1.66854	1.16116	1.13153	1.17123	1.27678	1.23054	1.25664	1.34778	1.55422
Hs.673853	1.35171	1.5121	1.4213	1.45458	1.41244	1.71011	1.63419	1.35501	1.48991
Hs.67397	0.950074	0.998116	0.96614	0.959876	0.995035	0.98251	1.01708	0.99411	1.02224
Hs.674	1.15963	1.11721	1.06177	1.0624	1.04875	1.07215	1.05736	1.0926	1.05934
Hs.675513	0.84802	0.856026	0.841794	0.838456	0.861424	0.850831	0.894358	0.844497	0.905179
Hs.677398	3.42513	5.24474	3.69052	4.62926	2.61299	4.89238	4.58179	5.54243	4.27519
Hs.678914	0.99873	0.997594	1.03027	0.991685	1.26279	1.02271	0.994226	0.995116	1.02209
Hs.679163	1.03212	1.04004	1.06943	0.997693	0.995569	1.01536	1.01393	1.03566	1.00899
Hs.684503	1.12096	1.15819	1.12625	1.08955	1.09977	1.155	1.22791	1.13254	1.26326
Hs.684904	0.988748	0.993058	0.921633	0.904313	0.897831	0.951505	0.929457	0.948299	0.985212
Hs.68864	0.916994	0.893925	0.896992	0.894197	0.897477	0.932552	0.876552	0.812411	0.879553
Hs.68876	1.1395	1.17972	1.17066	1.11569	1.1261	1.14726	1.1298	1.18408	1.12495
Hs.68879	4.38657	4.48576	4.96529	4.6349	4.54103	4.70084	4.6024	4.40814	4.06377
Hs.69089	1.2643	1.24485	1.19792	1.2874	1.2553	1.42369	1.3067	0.930471	0.849976
Hs.694	1.06708	1.08434	1.0945	1.07359	1.21798	1.08411	1.06792	1.10535	1.03152
Hs.695914	1.05544	1.05868	1.04628	1.00904	1.06866	1.13465	1.23464	1.38977	1.26609
Hs.696032	1.59664	1.50511	1.31691	1.4018	1.41212	1.80594	2.19408	2.0668	2.7039
Hs.697294	1.14083	1.08633	1.08984	1.10647	1.07658	1.04971	1.07424	1.03734	1.04411
Hs.699154	0.399087	0.430813	0.358858	0.347705	0.362833	0.430552	0.465836	0.493605	0.647621
Hs.699280	0.830447	0.834493	0.794379	0.773314	0.796533	0.777736	0.755838	0.818702	0.754852
Hs.699288	2.16021	1.55853	1.32591	1.27248	1.28915	1.05725	1.00264	0.946325	0.951503
Hs.699463	0.383311	0.364487	0.259983	0.310131	0.325568	0.431377	0.413717	0.498326	0.489048
Hs.7195	1.02044	0.988503	0.985524	0.983033	0.98197	0.990419	1.01745	0.991901	1.00525
Hs.72879	0.0923073	0.0692439	0.0489631	0.0542207	0.0547669	0.0503313	0.0404998	0.0962921	0.0420373
Hs.72885	1.01104	1.12907	1.03215	1.00153	1.02362	1.1291	1.14264	1.00334	1.09241
Hs.72901	0.718148	0.703262	0.658439	0.683367	0.654681	0.665353	0.667916	0.662376	0.696795
Hs.72912	1.21162	1.2461	1.09525	1.14737	1.19705	1.3108	1.23819	1.1626	1.07924
Hs.72938	1.00134	0.998388	1.01613	0.987815	1.00821	0.990029	0.966354	0.994318	0.974646
Hs.7303	0.839059	0.88486	0.818483	0.828952	0.827219	0.877123	0.85404	0.820133	0.866425
Hs.73090	0.765977	0.628217	0.577575	0.550849	0.59837	0.580303	0.645601	0.424861	0.571386
Hs.73172	0.554011	0.528967	0.485255	0.505735	0.460622	0.487964	0.485356	0.428582	0.459732
Hs.73527	0.541479	0.538498	0.510473	0.470761	0.444873	0.46884	0.505359	0.384398	0.432055
Hs.73722	1.24405	1.2606	1.1042	1.10905	1.01876	1.28448	1.25149	1.26073	1.31601
Hs.73793	0.265842	0.257432	0.238613	0.250325	0.205847	0.234124	0.229162	0.198617	0.229899
Hs.73800	1.08983	1.12679	1.08259	1.06545	1.04523	1.0898	1.08259	1.12134	1.08335
Hs.73809	1.12501	1.0871	1.07503	1.12459	1.09194	1.0663	1.12504	1.06904	1.06912
Hs.73849	0.246174	0.268847	0.242187	0.256666	0.220043	0.259318	0.234065	0.213119	0.242323
Hs.73853	0.35799	0.383876	0.346994	0.37332	0.304554	0.369823	0.332498	0.316634	0.355672
Hs.73893	1.46298	1.64002	1.31617	1.33629	1.20088	1.49147	1.34502	1.20671	1.17489
Hs.73917	0.996422	0.970607	0.966244	0.973931	0.945751	0.972223	0.95697	0.944476	0.970621
Hs.73962	0.998327	0.97976	0.989412	1.00827	1.04766	1.05459	1.13015	1.03585	1.07978
Hs.74034	0.134646	0.134054	0.134144	0.149022	0.125791	0.112081	0.112729	0.10862	0.0929709
Hs.74124	0.888097	0.957207	0.98077	0.895918	0.861752	0.910612	0.914231	0.872421	0.925827
Hs.744	0.943709	0.825579	0.587987	0.514218	0.420632	0.406472	0.357378	0.393521	0.423122
Hs.74471	0.529345	0.483492	0.498375	0.524322	0.484998	0.483729	0.483797	0.501194	0.503055
Hs.74615	1.07656	1.2439	1.90475	2.36151	2.9524	2.49378	3.05003	4.01027	3.3698
Hs.74647	1.03144	1.02673	1.01241	1.02799	1.00071	1.00053	1.00868	1.01286	1.0211
Hs.75093	0.75545	0.755962	0.804055	0.80821	0.853556	0.967789	1.20539	0.783316	0.779486
Hs.75160	3.34885	3.44199	3.03959	3.06536	3.12928	3.63346	4.24318	4.93857	4.93263
Hs.75189	1.00317	0.990083	0.910235	0.905225	0.861952	0.871375	0.858122	0.668376	0.657697
Hs.75262	1.50155	1.49694	1.84965	1.87459	2.2906	1.96218	2.52613	3.23691	3.27455
Hs.75294	1.34724	1.39982	1.29989	1.32649	1.23689	1.28192	1.18522	1.13903	1.16764
Hs.75527	0.781625	0.803417	0.690536	0.646205	0.535107	0.663145	0.618214	0.587447	0.670626
Hs.75599	0.267655	0.271658	0.257066	0.265237	0.224186	0.240319	0.228484	0.248431	0.242443
Hs.75615	0.60422	0.629316	0.621216	0.638318	0.546152	0.584477	0.566728	0.566986	0.558131
Hs.75640	1.12574	1.15709	1.17447	1.10914	1.23472	1.13288	1.12264	1.13222	1.11539
Hs.75643	0.0702909	0.0704369	0.0667816	0.0739252	0.0614	0.0755551	0.0719018	0.0550904	0.0746224
Hs.75703	1.15388	1.04945	1.01787	1.03019	1.04297	1.09064	1.03719	1.04094	1.10941
Hs.75799	0.749371	0.836759	0.815418	0.820051	0.720653	0.847883	0.861059	0.703486	0.833511
Hs.75969	0.789432	1.95164	2.90511	2.78807	3.00051	2.66405	3.43273	2.70716	2.47885
Hs.76111	0.871117	0.84523	0.812616	0.838166	0.817541	0.807884	0.793032	0.676919	0.710512
Hs.7636	0.582061	0.593041	0.551274	0.615618	0.519647	0.553373	0.542383	0.448526	0.533621
Hs.765	0.521426	0.552242	0.530286	0.524442	0.486632	0.540746	0.514001	0.446648	0.506242
Hs.76686	0.649919	0.613894	0.601494	0.55007	0.511362	0.475419	0.479083	0.364749	0.445405
Hs.767	1.18253	1.12175	1.10754	1.10498	1.1251	1.13692	1.14507	1.15097	1.17494
Hs.76753	2.71762	2.53613	2.94354	2.78772	2.82492	2.35166	2.75311	2.41882	2.73312
Hs.76884	0.174486	0.1562	0.144855	0.176473	0.152814	0.162131	0.165646	0.146924	0.161224
Hs.77269	0.580289	0.560782	0.525282	0.535447	0.52029	0.594879	0.615495	0.47127	0.581141
Hs.77274	0.0846443	0.0871972	0.0834795	0.0878471	0.0666167	0.0737764	0.0751534	0.0621398	0.0746231
Hs.77318	0.96044	0.862686	1.12701	1.25012	1.40762	0.961797	1.05383	1.05919	1.09856
Hs.77367	1.17666	1.13661	1.16976	1.1831	1.20551	1.15585	1.17146	1.13956	1.1199
Hs.77741	0.880715	0.890003	0.911606	0.907146	0.870514	0.861548	0.893506	0.844665	0.865599
Hs.77854	0.205264	0.212624	0.193483	0.194945	0.165029	0.191626	0.181885	0.178985	0.191726
Hs.78619	1.00317	1.11075	1.62987	1.708	1.85276	1.58263	1.6908	1.5487	0.900765
Hs.78769	0.602116	0.566182	0.694395	0.63061	0.552817	0.518955	0.540714	0.459596	0.481268
Hs.78771	0.320537	0.307242	0.29357	0.288539	0.263434	0.264288	0.245036	0.212323	0.26627
Hs.78888	0.94701	0.9909	0.921425	0.982379	0.938723	0.927993	1.00885	0.94535	0.763806
Hs.789	0.118305	0.118458	0.100389	0.117274	0.087268	0.101368	0.0866687	0.110523	0.0924192
Hs.78960	6.25185	5.15806	5.33862	6.10245	6.38465	5.23311	5.73605	7.59657	8.43396
Hs.78977	0.396011	0.399053	0.367096	0.387628	0.330911	0.366361	0.347371	0.313622	0.36235
Hs.79101	1.06331	1.07282	1.73192	1.72295	2.32857	2.54415	2.57133	2.73644	2.18657
Hs.79334	0.668318	0.662812	0.710847	0.813729	0.812204	0.69121	0.67432	0.747301	0.834148
Hs.799	0.941733	0.929888	0.868538	0.889704	0.847088	0.89687	0.8784	0.828542	0.856955
Hs.80395	0.0676537	0.0722875	0.0687065	0.0763088	0.0547717	0.0665698	0.0704379	0.0556088	0.0712396
Hs.80409	0.530566	0.543277	0.787403	0.774361	0.689283	0.69493	0.549743	0.53911	0.535906
Hs.80485	1.13962	1.12827	1.11485	1.12561	1.10202	1.10356	1.10181	1.17175	1.13005
Hs.80642	1.08586	1.17281	1.12694	1.07673	1.11785	1.04542	1.10942	1.17145	1.07576
Hs.80658	0.785473	0.797626	0.822987	0.813067	0.784517	0.878378	1.00436	0.688371	0.669059
Hs.80776	0.648202	0.716675	0.719333	0.774844	0.825206	0.907347	1.05777	0.882493	0.922079
Hs.80828	1.30126	1.28176	1.31249	1.37208	1.24867	1.23156	1.15993	1.2564	1.17571
Hs.81134	0.958343	0.931702	0.922179	0.94213	0.947335	0.931069	0.91595	0.90062	0.946135
Hs.81170	0.307601	0.32849	0.320761	0.34319	0.299755	0.336555	0.347804	0.280453	0.264088
Hs.81328	1.3461	1.22753	1.24117	1.27099	1.20421	1.57069	1.61001	1.75693	1.69679
Hs.81564	0.989954	1.02158	0.996023	0.97628	1.0096	0.981661	1.02482	1.05988	1.07949
Hs.81791	0.223288	0.271657	0.252671	0.283306	0.177143	0.239046	0.231897	0.177694	0.234111
Hs.82028	1.18081	1.2941	1.54631	1.52327	1.46238	1.07568	1.14655	1.16871	1.20352
Hs.82071	1.93115	2.25943	1.54747	1.57769	1.5287	1.83527	1.79814	2.11256	2.48036
Hs.82116	0.520637	0.494751	0.478356	0.498132	0.452847	0.447012	0.458305	0.392365	0.462663
Hs.82327	0.78344	0.816398	0.760637	0.721424	0.685432	0.67894	0.635444	0.428367	0.428185
Hs.82609	0.372476	0.346826	0.28342	0.249104	0.201283	0.199174	0.178322	0.136349	0.186053
Hs.82916	0.591223	0.644813	0.649428	0.553459	0.520272	0.453001	0.411035	0.608569	0.658547
Hs.82961	0.348031	0.379748	0.353666	0.354565	0.318527	0.379835	0.343123	0.313255	0.376914
Hs.82963	0.823044	0.75548	0.877836	0.874078	0.852038	0.835638	0.772722	0.794861	0.791748
Hs.83077	0.747543	0.758329	0.750817	0.74955	0.695118	0.708401	0.697197	0.674808	0.712023
Hs.83169	0.528059	0.597923	0.910925	0.997918	0.826767	0.462049	0.572042	0.565553	0.176907
Hs.83190	0.671996	0.679938	0.647775	0.601237	0.636941	0.613958	0.728405	0.603535	0.660153
Hs.8375	1.54133	0.962361	0.739822	0.855824	0.87823	0.943489	0.93995	0.774939	0.917441
Hs.839	0.697117	0.637823	0.603052	0.558389	0.715551	0.689842	0.676629	0.880816	0.741183
Hs.845	1.03926	1.0259	1.09221	1.0108	1.03327	1.08057	1.19587	1.30832	1.41965
Hs.85258	0.860321	0.833205	0.80061	0.809514	0.802359	0.802105	0.819835	0.801811	0.843096
Hs.856	1.02417	0.984997	0.991332	1.01227	1.00235	0.993841	0.983029	1.03735	1.01352
Hs.86154	0.322833	0.338658	0.324379	0.368444	0.305857	0.336147	0.313274	0.327131	0.332597
Hs.86368	0.385177	0.398079	0.447462	0.443708	0.497335	0.552722	0.416221	0.379113	0.265085
Hs.87202	1.02798	1.04638	1.03776	1.03512	1.00173	1.03376	1.0053	1.05507	1.04409
Hs.87968	0.870106	0.836347	0.81013	0.845301	0.820684	0.8214	0.805346	0.77624	0.842896
Hs.88013	0.825633	0.8028	0.763521	0.808063	0.760737	0.809472	0.739762	0.696791	0.750507
Hs.8821	0.468821	0.520001	0.457985	0.509146	0.411187	0.508282	0.478086	0.405843	0.51175
Hs.88218	0.819897	0.759878	0.778758	0.773387	0.769682	0.722667	0.688913	0.744235	0.753929
Hs.88556	1.12391	1.15846	1.18613	1.163	1.05634	1.05702	1.3071	1.38114	1.65917
Hs.8867	1.8944	0.748416	0.631052	0.69831	0.550108	0.515449	0.475322	0.477214	0.637006
Hs.889	1.10527	1.03153	1.09084	1.06421	1.07639	1.04819	1.05197	1.05047	1.04084
Hs.89499	0.875384	0.90551	0.882982	0.90476	0.85025	0.878552	0.857238	0.854899	0.839567
Hs.89538	0.98294	0.982086	0.964203	0.975861	0.944039	0.948533	0.896458	0.849744	0.912015
Hs.89575	1.22594	1.08128	1.13934	1.15494	1.16862	1.19144	1.30584	1.4654	1.16631
Hs.89584	1.17755	1.11034	1.01166	1.06206	1.07356	1.15761	1.11351	1.13459	1.1209
Hs.89603	0.245972	0.261077	0.258981	0.246238	0.238577	0.25092	0.281078	0.237586	0.256196
Hs.89648	1.0926	0.976846	0.821756	0.798308	0.907791	0.93408	0.783722	1.33436	0.83458
Hs.89649	0.70681	0.704403	0.709398	0.726027	0.699689	0.799719	0.824509	0.704087	0.767333
Hs.89663	0.343604	0.381444	0.360436	0.376962	0.306788	0.338848	0.320554	0.302353	0.315792
Hs.89679	1.0464	1.03441	1.02166	1.03421	1.04171	1.02899	1.04103	1.0269	1.02359
Hs.89690	0.481348	0.547053	0.462969	0.506754	0.395973	0.534119	0.48243	0.403201	0.546085
Hs.897	1.09589	1.12971	1.09343	1.11485	1.21655	1.28262	1.07989	1.17409	1.1438
Hs.89890	0.828289	0.913518	0.808855	0.867961	0.803745	0.874251	0.790201	0.657906	0.394384
Hs.90791	1.01964	1.09938	1.02979	1.04043	1.01015	1.03124	1.02316	1.03299	1.06175
Hs.93177	1.12477	1.12628	1.11493	1.0737	1.08703	1.11309	1.07316	1.11554	1.06561
Hs.93485	1.0029	1.04648	1.02001	1.02886	1.00237	0.996014	1.01929	1.02068	0.997563
Hs.936	1.17904	1.18661	1.14498	1.17233	1.05593	1.09015	1.1278	1.07318	1.12167
Hs.93907	0.998287	1.07468	1.03707	0.991728	1.05056	0.99357	1.00309	0.994202	1.05639
Hs.94107	1.06103	1.08426	1.05464	1.06905	1.07559	1.2037	1.21279	1.25173	1.12336
Hs.94367	0.998759	1.04545	1.02604	1.00491	0.964847	1.06416	1.04113	0.957446	1.05408
Hs.95008	1.25781	1.23025	1.10604	1.08647	1.14094	1.1861	1.12152	1.26027	1.17985
Hs.95120	1.18217	1.15588	1.15338	1.20038	1.17753	1.20201	1.22914	1.15795	1.17716
Hs.952	1.25403	1.12688	1.1794	1.18245	1.15027	1.15095	1.12102	1.13633	1.06986
Hs.95577	0.926586	0.8973	0.935082	0.836491	0.776274	0.816242	0.797689	0.576712	0.710532
Hs.95990	0.793718	0.847404	0.810893	0.844661	0.745786	0.932804	0.921982	0.652207	0.844195
Hs.96	0.518578	0.354262	0.369796	0.342539	0.298474	0.283569	0.247812	0.241129	0.323053
Hs.9731	1.05954	0.989685	0.888561	0.882863	0.879075	0.880729	0.825233	0.75677	0.818222
Hs.98255	2.49982	2.41026	2.16627	2.36669	2.633	3.03874	3.14563	3.10819	3.3076
Hs.98586	1.08804	1.06623	1.10364	1.08799	1.11479	1.11631	1.10303	1.06451	1.09041
Hs.98788	0.613266	0.574521	0.567988	0.5858	0.567852	0.586072	0.621934	0.624661	0.598696
Hs.99348	0.93095	0.954506	0.964809	0.982535	0.899917	0.964973	0.905178	0.940902	0.926204
Hs.997	1.0901	1.05629	1.04826	1.04088	1.09063	1.11152	1.13943	1.15041	1.17339
Hs.99863	0.984882	1.07008	0.981628	0.973938	0.958862	0.967348	1.00978	0.969763	0.993142
Hs.99884	0.977895	1.11771	1.10753	0.962921	0.952465	1.01091	0.984576	1.00305	1.00626
Hs.99992	1.10622	1.09222	1.16981	1.04848	1.16976	1.11698	1.06758	1.13198	1.01951

## Sheet: Standard Deviations
UniGene	IM00	IM02	IM04	IM06	IM09	IM12	IM18	IM24	IM48
Hs.101174	0.00850095	0.0136354	0.018764	0.0112474	0.0115166	0.0205783	0.0263752	0.0104368	0.0275793
Hs.1012	0.012814	0.0255652	0.0111405	0.0344976	0.0229769	0.0281765	0.01423	0.0335562	0.0279694
Hs.1019	0.0703292	0.0313809	0.0462072	0.0408521	0.0619304	0.0457816	0.055473	0.0590006	0.163562
Hs.101937	0.171866	1.18335	0.237291	0.233711	1.10681	1.21475	1.13895	0.95491	0.645299
Hs.102484	0.0731545	0.0792793	0.0474767	0.0199285	0.0313642	0.0434829	0.063958	0.0105755	0.0794296
Hs.103110	0.0288778	0.0423404	0.0120579	0.0414549	0.0449611	0.0536777	0.0326711	0.047961	0.0619369
Hs.103183	0.0276612	0.0600663	0.120878	0.0901337	0.130366	0.0304335	0.057395	0.0608529	0.109863
Hs.104119	0.00585684	0.0394885	0.00955475	0.0301963	0.0795492	0.0608415	0.073207	0.0609553	0.103548
Hs.104134	0.024769	0.0444029	0.0618894	0.0981404	0.0678546	0.189383	0.182407	0.0948236	0.0855793
Hs.104741	0.0168515	0.0805055	0.153324	0.084555	0.120077	0.0824026	0.0879981	0.040024	0.0627947
Hs.1051	0.0797331	0.0205132	0.060438	0.0324984	0.100433	0.0556847	0.0644847	0.0139398	0.0885094
Hs.105407	0.0235453	0.0351654	0.105547	0.0124868	0.00937212	0.00837045	0.0424191	0.0411066	0.0346101
Hs.106070	0.0307527	0.0372855	0.0788634	0.063989	0.104879	0.179344	0.285651	0.271992	0.152092
Hs.1074	0.022722	0.0272419	0.0260161	0.0511604	0.0389253	0.0511026	0.0513192	0.0184034	0.0696849
Hs.1076	0.0412359	0.0408735	0.0700113	0.0474502	0.0483795	0.0218691	0.0161822	0.0408006	0.0243916
Hs.108408	0.020784	0.0535578	0.0576419	0.00947066	0.0758066	0.0824631	0.0741968	0.0567102	0.0950506
Hs.109225	0.0544622	0.0507413	0.0924433	0.031458	0.0404541	0.0132568	0.0751426	0.0446145	0.0732487
Hs.109620	0.0484275	0.100647	0.0351895	0.0662358	0.0498479	0.0511504	0.080951	0.0301313	0.0799393
Hs.110014	0.0955494	0.0617282	0.0828862	0.0234341	0.0348382	0.0458403	0.0359619	0.0483767	0.0403302
Hs.110571	0.0846523	0.0743965	0.0846748	0.167094	0.128435	0.140337	0.226085	0.163215	0.295803
Hs.111779	0.0209258	0.0542255	0.0632922	0.0339495	0.0477368	0.0693982	0.115179	0.0946906	0.0713242
Hs.112405	0.0165416	0.0214466	0.0367254	0.00780518	0.0239247	0.025982	0.012497	0.0203518	0.0277768
Hs.112432	0.0549971	0.101042	0.061687	0.012812	0.042706	0.0785077	0.042826	0.0121544	0.127697
Hs.113577	0.0158234	0.0208693	0.0605101	0.0524045	0.0585398	0.0359828	0.0546932	0.06193	0.0728966
Hs.113916	0.0212113	0.0389128	0.0590625	0.0195906	0.0127894	0.0374809	0.002742	0.0272266	0.0471507
Hs.115242	0.0502769	0.0830193	0.0510019	0.0502224	0.0766009	0.0382461	0.0570481	0.0979257	0.125856
Hs.115617	0.0637718	0.0263636	0.0706594	0.0172275	0.0473021	0.0384501	0.0016704	0.0787632	0.0320564
Hs.116462	0.0156366	0.0139707	0.0185652	0.0187246	0.0225415	0.0250781	0.0244098	0.0115546	0.0131763
Hs.1166	0.0524538	0.0165082	0.016537	0.00881759	0.213256	0.173118	0.165696	0.0182456	0.0608158
Hs.117050	0.059956	0.0338631	0.0513942	0.0227974	0.045883	0.0924759	0.0582843	0.0483542	0.0509879
Hs.117367	0.0284864	0.0786235	0.061648	0.101435	0.0914203	0.0909406	0.0742175	0.0674775	0.0954318
Hs.118651	0.105011	0.0761215	0.0119285	0.0954979	0.0303317	0.00797104	0.0116635	0.0332319	0.0326471
Hs.118681	0.0289933	0.0101196	0.0304562	0.0232706	0.0205215	0.026489	0.0248558	0.0219907	0.03342
Hs.119689	0.0116067	0.0263543	0.0171981	0.00338762	0.0107055	0.0161784	0.00634821	0.017478	0.00994422
Hs.119825	0.0143672	0.0426346	0.0106065	0.0125494	0.0372229	0.0197979	0.040707	0.00155287	0.0172433
Hs.119882	0.00185554	0.00310581	0.00432545	0.00204514	0.00218919	0.00254946	0.00356128	0.000832931	0.00445592
Hs.120759	0.00166198	0.00161851	0.00326786	0.00125753	0.00265026	0.00127751	0.0024607	0.000794837	0.00344837
Hs.120949	0.0195895	0.0423495	0.0263993	0.0268559	0.0321555	0.039858	0.0495277	0.0189005	0.0415953
Hs.1211	0.0198156	0.0138003	0.0221561	0.0168235	0.00570604	0.00902795	0.0145613	0.00123283	0.0120987
Hs.121575	0.032506	0.0428342	0.0142523	0.0290959	0.0228954	0.0239412	0.0432824	0.00802226	0.0232919
Hs.122523	0.0288662	0.120003	0.123339	0.0596938	0.0704841	0.0968852	0.15762	0.118068	0.101908
Hs.122926	0.00942229	0.0148165	0.0536302	0.0471916	0.0532491	0.0251934	0.0535295	0.0379404	0.0949673
Hs.12341	0.03318	0.0198357	0.0300807	0.0369496	0.0351266	0.0373391	0.0212303	0.0359037	0.080654
Hs.1239	0.0124674	0.0300851	0.0184588	0.0263652	0.0311055	0.042664	0.0320002	0.0127681	0.0368856
Hs.12409	0.0362356	0.0509125	0.0703763	0.029588	0.0445481	0.0328597	0.0489811	0.0503884	0.0274986
Hs.124161	0.00679307	0.0337138	0.0173868	0.00529097	0.0116947	0.017923	0.0168898	0.022356	0.0226797
Hs.12420	0.0217548	0.106942	0.114365	0.0682469	0.110421	0.0988352	0.117687	0.114119	0.167494
Hs.124503	0.0814541	0.0384027	0.118709	0.0875715	0.200995	0.101127	0.071461	0.0096286	0.22687
Hs.125113	0.0350143	0.0408712	0.0507614	0.0263004	0.0358599	0.0305954	0.0201107	0.0500206	0.0361858
Hs.125180	0.303447	0.829448	1.20865	0.690132	1.01528	0.782378	1.5429	1.83645	2.04643
Hs.125898	0.0210258	0.0409787	0.0394497	0.027063	0.0271263	0.0168623	0.0376454	0.021249	0.0378953
Hs.126256	0.0145703	0.0128293	0.0197346	0.0145449	0.0114744	0.0135991	0.0143842	0.0107335	0.0109573
Hs.1270	0.0642076	0.0400137	0.0498954	0.0567337	0.0131516	0.0363811	0.0274585	0.0504462	0.026203
Hs.128433	0.0500441	0.0895987	0.0123194	0.0636446	0.0406325	0.0520569	0.0332025	0.00224176	0.0504048
Hs.1288	0.0155752	0.217739	0.0440632	0.0108671	0.0247389	0.0284285	0.00821392	0.00403658	0.0239998
Hs.12907	0.0328138	0.021481	0.0408809	0.0262411	0.0408011	0.0196715	0.0356217	0.0233834	0.0698262
Hs.129614	0.029523	0.0167887	0.0425246	0.0673501	0.0197977	0.0210892	0.0570363	0.0232118	0.0125003
Hs.129706	0.0789165	0.267317	0.203169	0.0613479	0.125758	0.204117	0.176034	0.0290422	0.0574106
Hs.129829	0.0701059	0.0449969	0.0446795	0.0590421	0.0350623	0.0814772	0.0866488	0.018712	0.0796309
Hs.129966	0.449274	0.457485	0.572673	0.290804	0.754799	0.544575	0.749549	0.532455	0.838111
Hs.1309	0.0216742	0.0199477	0.0413882	0.0155303	0.0196073	0.0114787	0.0385745	0.0551801	0.0177555
Hs.131255	0.032318	0.019507	0.0446228	0.0623855	0.0216649	0.00476832	0.00840741	0.0211003	0.0455474
Hs.131342	0.0223082	0.0240882	0.0191878	0.0377507	0.0355272	0.0230619	0.0298657	0.0341761	0.013644
Hs.131704	0.0133901	0.0326319	0.0213201	0.0209875	0.0206432	0.0375304	0.046699	0.0634226	0.0662384
Hs.131956	0.0141383	0.00556105	0.0356236	0.0147351	0.0116288	0.0104806	0.0313301	0.00580514	0.0268029
Hs.1321	0.0106286	0.028324	0.00567159	0.0133508	0.0178459	0.019677	0.0345346	0.0324696	0.0056699
Hs.13291	0.0301045	0.301099	0.382922	0.274605	0.276275	0.421082	0.550101	0.65767	0.540435
Hs.132966	0.00366699	0.00316616	0.00304564	0.0029272	0.0019144	0.00195075	0.00233695	0.00257162	0.00386437
Hs.132992	0.0408623	0.039891	0.00605805	0.0205718	0.0168464	0.0306015	0.0385057	0.00519193	0.0309388
Hs.133135	0.0259752	0.0361246	0.0822934	0.0763541	0.0610158	0.119521	0.0635823	0.0399903	0.154784
Hs.133379	0.0192538	0.0121784	0.0326652	0.0369138	0.0261307	0.104203	0.0299867	0.128022	0.029558
Hs.133892	0.0405162	0.0419212	0.0127724	0.0426655	0.012722	0.0506124	0.0314701	0.0129981	0.0330608
Hs.134084	0.0555504	0.0791635	0.0896201	0.094111	0.0458776	0.0394786	0.102313	0.0283093	0.162037
Hs.134194	0.0143767	0.0770428	0.0575449	0.030291	0.0407057	0.0596107	0.0321936	0.0240225	0.0292744
Hs.1349	0.0183582	0.0112543	0.0541412	0.0624829	0.0103929	0.0410633	0.0746703	0.0274918	0.0268181
Hs.134989	0.056368	0.129857	0.0486546	0.0584216	0.030556	0.0692691	0.0504008	0.00572373	0.0855062
Hs.134999	0.0126344	0.023699	0.0356513	0.0189508	0.0224983	0.0306075	0.0337778	0.0151708	0.0316155
Hs.135270	0.0390386	0.0510073	0.0291796	0.042367	0.0303863	0.0394844	0.0259018	0.0362031	0.0658844
Hs.135406	0.0392912	0.0837101	0.0904967	0.0988394	0.112882	0.0319352	0.043173	0.0241686	0.153126
Hs.1360	0.00722873	0.0425221	0.032761	0.024845	0.0517982	0.0489225	0.0294275	0.0157878	0.0460283
Hs.1361	0.0447968	0.0790962	0.0535012	0.0442852	0.0843953	0.158137	0.0671435	0.032244	0.0972683
Hs.136295	0.0179617	0.0272086	0.0185225	0.0445505	0.015703	0.0413618	0.020277	0.0408856	0.0337175
Hs.136348	0.277736	0.452709	0.90239	0.32247	1.5567	0.751128	1.34134	0.880514	0.901919
Hs.136557	0.0451785	0.0213457	0.0786822	0.010659	0.105478	0.0245467	0.0944618	0.00600063	0.0912859
Hs.137569	0.0154228	0.0265472	0.0220916	0.0133329	0.0269793	0.0348372	0.0216128	0.0294018	0.0175738
Hs.139322	0.0253146	0.0329826	0.0777478	0.0508045	0.0403468	0.0442295	0.0603319	0.00888078	0.0869448
Hs.1395	0.0416615	0.0313115	0.0488862	0.0126577	0.0485033	0.0757364	0.0300564	0.025548	0.28993
Hs.141125	0.0173055	0.0472896	0.061221	0.0692113	0.0846857	0.0473813	0.0657587	0.0489948	0.136531
Hs.1420	0.0160487	0.0301393	0.0177351	0.0187192	0.0236008	0.0130871	0.0117581	0.0197268	0.0315035
Hs.1428	0.0526443	0.0215691	0.0346578	0.016218	0.0727994	0.0444283	0.0301106	0.0379169	0.0409551
Hs.1430	0.122437	0.181349	0.0504978	0.044493	0.0519114	0.173232	0.136199	0.0149223	0.0840923
Hs.1437	0.0193656	0.0570165	0.0579681	0.0159238	0.0477885	0.0577758	0.11344	0.0826218	0.236698
Hs.143873	0.00183466	0.0182199	0.00418915	0.00406373	0.00205938	0.000922781	0.00493075	0.00143535	0.00305658
Hs.144287	0.0245903	0.0287724	0.0269421	0.0116727	0.0113165	0.0320318	0.0249096	0.0124708	0.0107239
Hs.1454	0.0153648	0.0429865	0.0330327	0.0362571	0.0394597	0.0486605	0.0485104	0.0321308	0.0708142
Hs.146591	0.0458173	0.0132509	0.0461839	0.0423143	0.0414016	0.0301003	0.0468269	0.0130875	0.0210551
Hs.1466	0.0106322	0.0373171	0.0174004	0.0144204	0.0193836	0.0295358	0.0221077	0.0190506	0.0126034
Hs.146804	0.0462999	0.14707	0.193589	0.193103	0.083589	0.157129	0.243104	0.190718	0.311866
Hs.147433	0.00225671	0.0442066	0.0292489	0.0236884	0.0185726	0.0312037	0.0317364	0.0196679	0.0279419
Hs.148427	0.0156982	0.0243667	0.0604651	0.0539382	0.0230417	0.015346	0.032507	0.0302258	0.0457226
Hs.14846	0.0249812	0.0617312	0.0449326	0.0145458	0.0466197	0.023059	0.0297577	0.0506075	0.0605845
Hs.148841	0.0538608	0.0572071	0.0590116	0.0127918	0.0307489	0.050041	0.0686059	0.0825552	0.0186193
Hs.149195	0.0215831	0.0243784	0.0329739	0.0226009	0.03006	0.0306327	0.119624	0.00189732	0.0400343
Hs.149252	0.00176972	0.00365845	0.00351494	0.00266771	0.00125423	0.00184073	0.00293883	0.00168693	0.00632108
Hs.149342	0.0404907	0.0443511	0.0158014	0.055888	0.0665366	0.0161625	0.0300927	0.0465253	0.00134801
Hs.1497	0.026064	0.0229343	0.0185981	0.0261949	0.0163824	0.0233117	0.0247902	0.00975719	0.0122877
Hs.149894	0.0244322	0.0865797	0.174256	0.0680242	0.1809	0.0695918	0.110161	0.0444571	0.278248
Hs.150136	0.026244	0.0988575	0.0707566	0.0535832	0.221978	0.138044	0.166375	0.0639586	0.175507
Hs.150749	0.0085479	0.0529101	0.0460046	0.0233315	0.0239836	0.0365064	0.0562855	0.0800108	0.102801
Hs.150793	0.0853943	0.112196	0.0593586	0.169479	0.0624236	0.120677	0.159206	0.0350768	0.310385
Hs.151573	0.0554306	0.183907	0.045242	0.0282039	0.0230802	0.0605145	0.05157	0.0752287	0.0319114
Hs.15159	0.0171383	0.0317741	0.020106	0.0247085	0.0277303	0.0266526	0.0394143	0.016809	0.0403178
Hs.151777	0.025623	0.0457439	0.0521783	0.0247506	0.0419926	0.0257249	0.0328178	0.029028	0.0586776
Hs.152292	0.219509	0.250463	0.693853	0.540911	0.796303	0.275673	0.676092	0.677573	1.17919
Hs.152531	0.0139168	0.054363	0.0993742	0.151602	0.311493	0.1966	0.186047	0.0706162	0.108391
Hs.153322	0.014754	0.0403293	0.0375458	0.0356095	0.0551056	0.0911679	0.0287804	0.0130878	0.0719858
Hs.154276	0.0268741	0.0103815	0.0498306	0.0486457	0.066251	0.0467666	0.0433135	0.0357388	0.0758587
Hs.154495	0.0230855	0.0818564	0.00759066	0.0766076	0.0396781	0.0951438	0.0609426	0.00128579	0.063691
Hs.154654	0.0396841	0.0444397	0.0821026	0.0813444	0.117324	0.0540567	0.0678379	0.0572647	0.0573132
Hs.154704	0.0279893	0.0467877	0.0652833	0.0270285	0.103666	0.115612	0.157476	0.0887071	0.148947
Hs.155247	0.0121851	0.0559337	0.0380454	0.0244559	0.0353245	0.0401658	0.0795869	0.0552131	0.0718645
Hs.155591	2.10308	2.87254	3.84509	2.83501	5.64127	2.80844	2.61847	0.528164	4.86395
Hs.155597	0.0090212	0.0296271	0.0344236	0.0175609	0.024521	0.0401208	0.0895746	0.0557499	0.0550892
Hs.155644	0.0259283	0.0351961	0.0415515	0.0465392	0.0288044	0.0305519	0.0123576	0.0217084	0.0496467
Hs.155651	0.0146273	0.0181126	0.0362119	0.0301301	0.0207136	0.03113	0.0173775	0.0153182	0.0316895
Hs.156289	0.0542296	0.0394067	0.109953	0.0310188	0.0122546	0.0447505	0.0667416	0.102985	0.0161067
Hs.1573	0.0593151	0.248824	0.0495274	0.121139	0.0615543	0.144423	0.0637322	0.0370906	0.0770941
Hs.157429	0.00538511	0.0113975	0.0188015	0.00632786	0.00931438	0.00979842	0.011213	0.00678346	0.0133367
Hs.157872	0.0229253	0.00732783	0.0249071	0.0675053	0.0185446	0.0136406	0.0452392	0.0535764	0.0236042
Hs.158195	0.0196922	0.0374989	0.109363	0.0471327	0.0699388	0.0684382	0.0624618	0.0171749	0.124667
Hs.158300	0.0347265	0.0263422	0.0280196	0.0464541	0.0256622	0.0209225	0.0401534	0.0182839	0.0263359
Hs.1584	0.019063	0.0321854	0.0284289	0.0396244	0.0180958	0.0238986	0.0748882	0.0500802	0.0434099
Hs.158932	0.011506	0.00858902	0.012508	0.0163037	0.0161259	0.0212938	0.0128343	0.00654678	0.0169957
Hs.159223	0.0334839	0.05289	0.0363195	0.0152729	0.0526642	0.0470594	0.0625958	0.0428766	0.0614157
Hs.159297	0.0279043	0.0160799	0.0291097	0.0734334	0.10843	0.0928438	0.0517988	0.049346	0.0734541
Hs.159448	0.0748242	0.220401	0.147869	0.174841	0.0827489	0.184047	0.19308	0.127787	0.294283
Hs.159628	0.0191359	0.0337194	0.0357371	0.0268736	0.0107232	0.037913	0.0395517	0.00383174	0.0191281
Hs.1600	0.0256644	0.111649	0.0477102	0.0293172	0.00605895	0.0377066	0.0430122	0.0248793	0.041426
Hs.160411	0.0351309	0.0194951	0.0237954	0.0150577	0.0233434	0.0137067	0.0223493	0.0207065	0.0190322
Hs.160556	0.0130533	0.0224226	0.0159696	0.0329153	0.0276336	0.0329951	0.0160279	0.025952	0.0302676
Hs.160562	0.017167	0.0123306	0.0104684	0.00788448	0.0129548	0.0143368	0.018234	0.0139294	0.00945542
Hs.160786	0.00314934	0.00909942	0.0122886	0.0113357	0.00659607	0.0156357	0.0255732	0.022524	0.0216673
Hs.160871	0.00465978	0.0275226	0.0497604	0.0495625	0.0244389	0.0406588	0.0660345	0.0994149	0.0282824
Hs.160953	0.0265188	0.0636104	0.0442687	0.108146	0.0238485	0.0816641	0.0668129	0.107159	0.0541817
Hs.162646	0.00629641	0.00354212	0.00843815	0.00645596	0.00418136	0.00617823	0.0102242	0.00349734	0.0185733
Hs.162757	0.0188358	0.0462149	0.0597979	0.0440242	0.115628	0.0836748	0.119272	0.110193	0.108791
Hs.162807	0.00215471	0.00251956	0.00101353	0.00148897	0.00134166	0.0022571	0.00112395	0.00111103	0.00167083
Hs.163484	0.00386651	0.005043	0.0057561	0.00325363	0.00538353	0.00427459	0.00351945	0.0018502	0.00604562
Hs.163867	0.02831	0.137005	0.0563731	0.107691	0.100999	0.204909	0.0847994	0.0279157	0.106297
Hs.164060	0.0132865	0.0228822	0.0105581	0.0152391	0.0171032	0.0170504	0.0205446	0.0126867	0.0436931
Hs.164226	0.086618	0.110055	0.154314	0.174975	0.213474	0.0575456	0.0840633	0.0758187	0.0637508
Hs.1644	0.0194755	0.0422098	0.0264209	0.0684826	0.0262225	0.0409147	0.0410149	0.0307671	0.017226
Hs.165950	0.00177921	0.00937512	0.0355745	0.0154716	0.0232741	0.0308424	0.0306522	0.0544211	0.0276714
Hs.166017	0.0105951	0.0206252	0.0366225	0.0234847	0.0299384	0.0179227	0.0251836	0.0203219	0.030101
Hs.166120	0.0579183	0.0729441	0.00801639	0.0705437	0.147928	0.110585	0.21925	0.145366	0.190522
Hs.167017	0.05493	0.0549105	0.0418623	0.0670439	0.0476588	0.0556411	0.0232511	0.102465	0.0377676
Hs.167584	0.0689576	0.0276314	0.028174	0.0303444	0.0386802	0.0209905	0.0324524	0.119699	0.0486949
Hs.169002	0.0581839	0.0257403	0.0663167	0.0584313	0.0149174	0.0957553	0.0586489	0.0116155	0.0472084
Hs.169246	0.00124062	0.00937043	0.0041069	0.00854934	0.00426331	0.00753257	0.00751566	0.00560771	0.00923358
Hs.169249	0.0589815	0.0236809	0.0220852	0.0239797	0.0480672	0.0976922	0.0217498	0.0643104	0.0781954
Hs.170009	0.0394247	0.0210783	0.0348588	0.0340969	0.064793	0.0798192	0.0502061	0.0807461	0.00858419
Hs.170355	0.538556	1.51798	0.643547	0.495467	0.341707	1.37576	2.69955	2.11993	1.64476
Hs.171695	0.0404145	0.0316812	0.0345599	0.0237815	0.0279377	0.0399697	0.0428383	0.0255488	0.050953
Hs.171995	0.0262701	0.0269528	0.0347664	0.0168615	0.0410624	0.0282428	0.0505103	0.0215835	0.0367461
Hs.1722	0.0119364	0.0120249	0.0128387	0.00973029	0.0101472	0.0141319	0.0117417	0.00954629	0.0114524
Hs.172550	0.106855	0.16878	0.0915383	0.108092	0.128581	0.0838872	0.117025	0.0367846	0.141827
Hs.172631	0.137664	0.13477	0.0684312	0.0942732	0.129655	0.255052	0.138739	0.04883	0.43515
Hs.1735	0.0442592	0.0193475	0.0331273	0.0365856	0.113064	0.0204634	0.108662	0.10294	0.0884089
Hs.173724	0.0134564	0.0114263	0.0313483	0.0238534	0.0197708	0.0392212	0.0875109	0.0402705	0.0481801
Hs.174050	0.0563367	0.367005	0.191296	0.229418	0.135107	0.298472	0.365051	0.282264	0.299857
Hs.174249	0.0105183	0.0397022	0.00588597	0.0359062	0.0375837	0.0468064	0.164163	0.0649603	0.0902661
Hs.17441	0.219221	0.2936	0.471883	0.390931	0.540452	0.19043	0.17969	0.381275	0.555692
Hs.1755	0.0213187	0.0366469	0.0901769	0.0206954	0.161578	0.0366303	0.10459	0.0812092	0.154456
Hs.177841	0.00773013	0.0173268	0.0143818	0.0173644	0.00914286	0.0100595	0.00382269	0.0141637	0.0165204
Hs.178023	0.0127388	0.0314416	0.0178296	0.0419626	0.0245298	0.0454592	0.0377276	0.0370687	0.0351428
Hs.178098	0.00934363	0.0250041	0.0338855	0.0247575	0.0185847	0.0661232	0.0114781	0.018279	0.042947
Hs.1787	0.0413562	0.0107236	0.0301206	0.0409015	0.0263493	0.039124	0.0208207	0.022347	0.019268
Hs.17908	0.0118112	0.0438353	0.0225334	0.0320188	0.0337981	0.0283255	0.0532444	0.0519233	0.119603
Hs.179718	0.021502	0.0427009	0.0186303	0.0191984	0.0399718	0.0323549	0.0373008	0.034095	0.0375684
Hs.1799	0.0148766	0.0113411	0.0180392	0.0213843	0.012215	0.0400695	0.010282	0.00758432	0.0205584
Hs.179986	0.014073	0.0442244	0.0499336	0.0421442	0.0498588	0.0502915	0.0956513	0.0677298	0.0908432
Hs.180878	0.00653658	0.0373716	0.0190623	0.00722194	0.0325246	0.004121	0.0167043	0.00571157	0.0124262
Hs.180919	0.00324034	0.00659089	0.00500528	0.00579326	0.0040972	0.00302155	0.00284308	0.00158511	0.00678992
Hs.18160	0.0608515	0.0156667	0.0413341	0.0261631	0.0493586	0.0385731	0.0332038	0.0214686	0.0188719
Hs.181768	0.0819957	0.0929605	0.0872787	0.0806934	0.0570958	0.0223326	0.0996453	0.0552941	0.160327
Hs.183109	0.0283203	0.0491281	0.0163883	0.0438818	0.0236439	0.0430031	0.0600657	0.0251062	0.0179642
Hs.1832	0.102892	0.0470798	0.0418787	0.0170905	0.0136782	0.0563619	0.080024	0.0250618	0.0325855
Hs.184085	0.0317486	0.144371	0.0738611	0.0265005	0.00739905	0.141527	0.0618803	0.0180756	0.0544988
Hs.184926	0.0501703	0.00224265	0.00375859	0.0226054	0.0811007	0.0674057	0.0520514	0.0489564	0.0847756
Hs.184927	0.031075	0.0411754	0.0475271	0.0443311	0.0455823	0.0418728	0.0657292	0.0205869	0.0498608
Hs.184945	0.0266876	0.0466261	0.062388	0.0514434	0.14209	0.0299925	0.0964715	0.0428747	0.0505735
Hs.18676	0.19842	0.934277	1.0695	0.774174	0.808595	0.608414	0.672435	0.147951	1.26333
Hs.1872	0.0192754	0.0240259	0.0196133	0.0107441	0.0191747	0.0197163	0.0181608	0.00455988	0.0192493
Hs.187338	0.0115778	0.0311236	0.0240814	0.0135733	0.0728619	0.0876864	0.0370683	0.0256333	0.0148142
Hs.187946	0.0160807	0.0435226	0.0492166	0.049501	0.0423054	0.0244388	0.0207184	0.00785507	0.0406758
Hs.1892	0.0473918	0.0475971	0.0318148	0.024873	0.0536785	0.0548228	0.0564173	0.00079633	0.0273103
Hs.1897	0.0229814	0.0498333	0.0714245	0.0321788	0.00322227	0.0155105	0.0144568	0.0213231	0.0625187
Hs.189772	0.0298614	0.148315	0.042872	0.0329819	0.0220172	0.0598254	0.0855276	0.0786526	0.0949412
Hs.190495	0.0165117	0.00536439	0.0141456	0.0078598	0.0135198	0.0116262	0.0203757	0.0107129	0.0168679
Hs.1905	0.0257961	0.034366	0.0470826	0.0435714	0.0223366	0.0386655	0.0191224	0.033842	0.0142152
Hs.191911	0.576557	1.13494	2.08338	1.83502	1.43695	1.22745	2.37189	2.34877	3.89484
Hs.19192	0.0253306	0.0719379	0.0728418	0.0192772	0.0817256	0.0420692	0.0629969	0.0318595	0.0694155
Hs.193717	0.0116464	0.0141261	0.0135437	0.0140176	0.0124616	0.019008	0.0153583	0.0123068	0.01701
Hs.19383	0.000477702	0.00136791	0.00180897	0.000753671	0.00142618	0.00176709	0.00244079	0.00218975	0.00372675
Hs.194143	0.00295617	0.00632855	0.0191693	0.0178546	0.0245087	0.0181788	0.0183801	0.0144216	0.0147222
Hs.194236	0.0112186	0.0102124	0.019886	0.00876893	0.0144539	0.0189868	0.0167398	0.00785765	0.0164187
Hs.194333	0.0254879	0.0813705	0.107323	0.0611032	0.03869	0.0577464	0.0586322	0.0200353	0.0820994
Hs.194695	0.040077	0.0706101	0.0500226	0.0536897	0.0692125	0.0699869	0.112365	0.0245044	0.0309676
Hs.194783	0.0604955	0.0291546	0.0569455	0.0394993	0.0452429	0.0156971	0.0107071	0.0650534	0.0558043
Hs.195040	0.0228962	0.0111891	0.023265	0.0236897	0.0321302	0.0141784	0.0395465	0.0460859	0.0194889
Hs.195659	0.00800022	0.0153437	0.0148167	0.0127431	0.0101133	0.0146596	0.0218021	0.01755	0.0181502
Hs.196384	0.140154	0.0203016	0.0479714	0.0287234	0.0341916	0.0126042	0.0173201	0.00597578	0.0424659
Hs.196952	0.0134632	0.00199333	0.0185567	0.0135427	0.00213486	0.00683427	0.00572984	0.00960305	0.00571431
Hs.197029	0.0235281	0.00983558	0.0174485	0.0257047	0.0162732	0.0349528	0.0291459	0.0333394	0.0239919
Hs.1976	0.0167681	0.0489259	0.0161785	0.0597475	0.0631634	0.0270266	0.00725797	0.0211379	0.018817
Hs.198998	0.0460363	0.140917	0.129512	0.107473	0.204562	0.061191	0.109788	0.108784	0.222447
Hs.1992	0.0656614	0.0857417	0.0735468	0.0398773	0.219551	0.0594283	0.0305996	0.0019676	0.0344088
Hs.2	0.0678552	0.020497	0.0222392	0.0622325	0.0435252	0.103045	0.0485659	0.0621004	0.0175838
Hs.200250	0.0169195	0.0436004	0.0314291	0.02589	0.0246701	0.0264342	0.0216589	0.0160713	0.0146495
Hs.200716	0.0522785	0.130382	0.0450723	0.0737443	0.152766	0.0949468	0.11782	0.0927148	0.261768
Hs.201897	0.0177574	0.0556145	0.071702	0.0445272	0.0766178	0.0885967	0.102486	0.0465624	0.0757825
Hs.201918	0.0497639	0.0209812	0.0760305	0.0783279	0.0841388	0.0373461	0.0629941	0.0312423	0.149431
Hs.202	0.00950484	0.0139389	0.0148225	0.0337152	0.0173006	0.0394351	0.0361654	0.0451178	0.0321915
Hs.202095	0.0194095	0.010473	0.0616262	0.0520667	0.0428474	0.0181395	0.0986734	0.073653	0.0300804
Hs.202179	0.0588848	0.348761	0.071076	0.0843652	0.0534749	0.23069	0.240184	0.27168	0.240341
Hs.2022	0.0497196	0.0332784	0.0400587	0.0435846	0.0278834	0.0344839	0.0287433	0.0442045	0.0137908
Hs.202354	0.0213816	0.0262865	0.0289733	0.0187053	0.0212752	0.0421574	0.0372139	0.0368434	0.0289568
Hs.202453	0.00386458	0.00806135	0.00717481	0.00274292	0.00263524	0.00597358	0.00414637	0.00335068	0.00719079
Hs.202672	0.0120191	0.024373	0.0848322	0.0413991	0.0810847	0.0282606	0.0648677	0.0406857	0.0927031
Hs.20315	0.0407883	0.458363	0.325015	0.214349	0.260405	0.240391	0.559563	0.739465	0.474061
Hs.203717	0.0104458	0.00437798	0.0209607	0.00964409	0.0205845	0.00580954	0.00653952	0.0125467	0.0193755
Hs.20516	0.0143701	0.0615328	0.0307077	0.0502457	0.0643218	0.0439368	0.0336225	0.0246326	0.081612
Hs.207745	0.0210842	0.0274339	0.0436413	0.0258808	0.0592585	0.0126149	0.0180156	0.0536809	0.0430364
Hs.208124	0.0141894	0.0559179	0.0493278	0.0333731	0.0246517	0.040721	0.0369571	0.0293094	0.0916616
Hs.209983	0.0484299	0.0911574	0.0541902	0.116587	0.0564273	0.0284625	0.0849037	0.0556237	0.0950876
Hs.21160	0.0945674	0.341354	0.130722	0.179485	0.128775	0.223615	0.163625	0.0753337	0.0830588
Hs.212172	0.0670438	0.0531876	0.0364841	0.00806685	0.0451705	0.116112	0.0578895	0.0122952	0.0666284
Hs.212293	0.0130726	0.046445	0.0277658	0.0119501	0.0318557	0.0140824	0.0467701	0.016884	0.0380661
Hs.212838	0.023951	0.0357673	0.0250198	0.00284867	0.0256783	0.0163968	0.015179	0.00590103	0.0373351
Hs.213289	0.030702	0.0812366	0.0405623	0.0269978	0.0347793	0.028879	0.0806153	0.0517433	0.05066
Hs.214142	0.0086735	0.0109903	0.01367	0.0111237	0.017564	0.0250225	0.0302216	0.0285456	0.0553227
Hs.2157	0.0233556	0.0534352	0.045537	0.0434618	0.0267319	0.0505465	0.0208933	0.00498295	0.0382916
Hs.2161	0.0234918	0.0302049	0.037223	0.0323464	0.0379998	0.0277127	0.0441214	0.0138298	0.0466395
Hs.218040	0.00665095	0.0096953	0.00919482	0.00735616	0.00536736	0.00993948	0.00854557	0.0049675	0.00826816
Hs.219140	0.0295816	0.0474022	0.0627097	0.0516622	0.0558233	0.0749462	0.0220776	0.0757089	0.0608181
Hs.2200	0.193947	0.0373976	0.0348112	0.0525722	0.0424474	0.0735915	0.0705618	0.0369786	0.071948
Hs.220971	0.00951855	0.0129442	0.0157275	0.017361	0.0177418	0.00816632	0.0214129	0.0115156	0.0304267
Hs.2233	0.0718781	0.0203761	0.0638164	0.0661362	0.102875	0.00979854	0.0511925	0.0379161	0.019949
Hs.223782	0.0516051	0.047488	0.0785977	0.0265852	0.0257879	0.0556616	0.0446375	0.0100214	0.0481735
Hs.224171	0.0123586	0.0233538	0.00851301	0.0229587	0.00632306	0.0180272	0.0170931	0.0044522	0.0158241
Hs.2242	0.0189874	0.0381656	0.0230114	0.0304243	0.0345023	0.0490338	0.0457818	0.102747	0.0548789
Hs.2246	0.135023	0.109883	0.0771409	0.0516785	0.047198	0.105489	0.148663	0.0642707	0.117109
Hs.224698	0.00762758	0.00733152	0.0214884	0.0117667	0.00783642	0.0166672	0.0113522	0.00282226	0.0241965
Hs.2247	0.0714699	0.0692332	0.0387692	0.0883591	0.0486287	0.0211486	0.0214084	0.092524	0.0332237
Hs.2250	0.0122295	0.102576	0.0423161	0.0252701	0.0317509	0.0346948	0.047399	0.0226409	0.0362274
Hs.2256	0.056605	0.0627569	0.142962	0.0653865	0.0976451	0.0532994	0.0202816	0.0060437	0.0412065
Hs.2257	0.0409922	0.0352886	0.032362	0.0332062	0.0173271	0.0681435	0.0651159	0.0214479	0.0446561
Hs.22584	0.010206	0.0230107	0.0367058	0.0378025	0.0208242	0.0368725	0.0606554	0.0419197	0.0196856
Hs.225936	0.0529724	0.0537967	0.0616641	0.0791495	0.0229363	0.0532228	0.0517159	0.0416737	0.0983463
Hs.226780	0.0235203	0.0347574	0.0920523	0.0645024	0.0749789	0.0323005	0.0492549	0.0276426	0.0846777
Hs.227253	0.0298881	0.141216	0.0933755	0.090598	0.180448	0.136319	0.136354	0.225999	0.188531
Hs.227777	0.0221563	0.0480655	0.0272135	0.034079	0.0191443	0.0367875	0.0437275	0.0463383	0.0376228
Hs.227817	0.0235833	0.0647265	0.0830272	0.0270153	0.0409513	0.0586535	0.076897	0.0559278	0.115455
Hs.22867	0.0685198	0.143753	0.131058	0.077182	0.110367	0.0223686	0.0559683	0.0368526	0.177648
Hs.2303	0.0310065	0.0117121	0.0708781	0.0172079	0.025792	0.0231207	0.0119107	0.0179571	0.0188682
Hs.231367	0.018998	0.0465943	0.0342196	0.0152652	0.0458626	0.0448321	0.0340824	0.0322114	0.0248885
Hs.232375	0.0145469	0.0610573	0.058317	0.0373487	0.0228801	0.039752	0.0731469	0.0580447	0.0734954
Hs.2324	0.00714651	0.0206136	0.0479405	0.0365605	0.0251112	0.0820169	0.0476309	0.0330548	0.0503598
Hs.234249	0.0194281	0.0283354	0.0202147	0.0254842	0.0339039	0.0715803	0.0560015	0.0485943	0.0740206
Hs.234898	0.0190704	0.0412081	0.0540905	0.0593738	0.0125865	0.10127	0.0686898	0.0307246	0.0295261
Hs.2353	0.0292111	0.0188182	0.0153396	0.0256888	0.0373193	0.0255818	0.0227377	0.03351	0.0296927
Hs.235368	0.0618337	0.0699217	0.0391097	0.0183286	0.0323773	0.0296781	0.065975	0.0114454	0.0224511
Hs.235935	0.00659714	0.0168658	0.0243795	0.00815382	0.0216497	0.0186833	0.0134658	0.00868678	0.0196033
Hs.23650	0.0321428	0.0657236	0.0571717	0.0634703	0.022883	0.053456	0.0790657	0.0409371	0.113767
Hs.237658	0.00228145	0.00374856	0.00496815	0.00195739	0.00247624	0.0013536	0.00314748	0.00253335	0.00640376
Hs.238990	0.0201342	0.111258	0.0673051	0.0450402	0.0324577	0.0881004	0.12591	0.108897	0.0566501
Hs.23960	0.0814349	0.0710981	0.0205877	0.0904426	0.0200793	0.0905309	0.104887	0.000553119	0.0644806
Hs.2399	0.0573803	0.00800278	0.0192443	0.00849068	0.0241112	0.0511566	0.0465622	0.0177621	0.0322195
Hs.241382	0.217026	0.472161	0.192201	0.331645	0.215214	0.541918	0.433076	0.423523	0.680291
Hs.241570	0.0154783	0.0138229	0.0147952	0.0155575	0.0213585	0.02633	0.0215692	0.0133662	0.0227542
Hs.244139	0.187297	0.328612	0.586877	0.246296	0.419535	0.215459	0.437464	0.336125	0.621263
Hs.244723	0.275013	1.58382	0.973859	0.909348	0.403225	0.528225	0.914274	0.289801	0.9846
Hs.24529	0.0110703	0.12443	0.17556	0.106659	0.11462	0.0785209	0.131634	0.0409129	0.107206
Hs.247565	0.0217196	0.0420141	0.0271608	0.034252	0.0497781	0.01936	0.0365276	0.0440867	0.0270896
Hs.247787	0.0455854	0.0992499	0.0342031	0.0315451	0.0233092	0.0517897	0.0956126	0.0277069	0.0812242
Hs.247940	0.0383143	0.0354642	0.00659447	0.0363962	0.012333	0.0887721	0.0309992	0.0101838	0.0640055
Hs.247979	0.0409359	0.0318714	0.0865146	0.0506469	0.0228916	0.0482001	0.0216289	0.0625402	0.138413
Hs.248101	0.0264137	0.0308005	0.0293597	0.0208754	0.033978	0.06274	0.0616006	0.0393809	0.0219554
Hs.248112	0.0247023	0.0237367	0.0208158	0.0445612	0.0298081	0.0619551	0.0374251	0.0184012	0.0341211
Hs.248141	0.0437393	0.0367147	0.0447248	0.0737242	0.0439481	0.0127034	0.060016	0.00465264	0.0342949
Hs.248144	0.0496317	0.056838	0.0332892	0.0283892	0.0363613	0.0181968	0.0171718	0.0352591	0.0790688
Hs.248156	0.0789326	0.0373001	0.00533829	0.0400572	0.118104	0.0582436	0.0267717	0.0224444	0.034106
Hs.248164	0.0289133	0.0448529	0.0723572	0.0362934	0.0417588	0.0619761	0.100079	0.0067477	0.0141346
Hs.248184	0.0315519	0.00953737	0.0105084	0.0411361	0.0430913	0.0291399	0.0303513	0.205773	0.0232754
Hs.2484	0.0825378	0.0566723	0.0352901	0.0404751	0.0152347	0.0428847	0.0604226	0.0139992	0.0475185
Hs.248472	0.0151707	0.0284388	0.0249976	0.0184911	0.0317673	0.0201879	0.0125287	0.0172063	0.0293677
Hs.2490	0.0845083	0.395058	0.312003	0.215398	0.147286	0.0746226	0.224471	0.260546	0.359622
Hs.249171	0.173997	0.289024	0.0706555	0.485943	0.39131	0.468335	0.414219	0.365663	0.647454
Hs.249184	0.00181152	0.00250086	0.00377677	0.00176287	0.00109256	0.00242095	0.00360894	0.00172216	0.0040148
Hs.249196	0.0347679	0.0373792	0.0115934	0.0256415	0.0657683	0.0520261	0.0226637	0.0800666	0.0275576
Hs.249200	0.0370751	0.0404624	0.041566	0.0138606	0.0111869	0.0304165	0.0372028	0.00503149	0.0479662
Hs.249211	0.0575799	0.0685929	0.0270721	0.0451904	0.0317584	0.0403815	0.10303	0.140387	0.119385
Hs.249441	0.259772	0.0487451	0.237695	0.174708	0.148363	0.0554592	0.16541	0.0600856	0.156057
Hs.249718	0.0435936	0.0758498	0.0605225	0.06333	0.064956	0.0878186	0.0718883	0.0224908	0.141466
Hs.250	0.0217905	0.0523058	0.00270356	0.057606	0.0213039	0.039515	0.039603	0.0337493	0.0491733
Hs.250083	0.0160679	0.0534896	0.0364747	0.035631	0.00958161	0.0419968	0.0570546	0.0523761	0.0122465
Hs.25022	0.0473768	0.0351177	0.0620998	0.126528	0.0494971	0.0562727	0.0537832	0.0148558	0.0792204
Hs.250615	0.0424004	0.056803	0.0347062	0.0332079	0.0440951	0.0691105	0.0650071	0.0217079	0.0906479
Hs.250666	0.0318416	0.0175936	0.0206443	0.0164023	0.0222064	0.0188644	0.0172711	0.014274	0.0332233
Hs.250822	0.0471691	0.0296591	0.00617589	0.0242049	0.0188564	0.0483221	0.043169	0.0019675	0.0135011
Hs.25155	0.0042231	0.0793113	0.0528811	0.0447011	0.0289557	0.0395813	0.0590407	0.0830549	0.0741875
Hs.251680	0.0256268	0.0342658	0.0450835	0.0178454	0.0477977	0.0420889	0.0179751	0.0287951	0.0224128
Hs.252229	0.0658953	0.124968	0.0624391	0.123089	0.140122	0.144715	0.163619	0.0923886	0.167401
Hs.25292	0.0328204	0.02788	0.0409693	0.0162976	0.0289239	0.0310549	0.0655904	0.0379654	0.0761363
Hs.253197	0.0204848	0.0658875	0.0229691	0.0160059	0.0177485	0.0510687	0.0710045	0.0566824	0.0508763
Hs.25348	0.0187027	0.0544815	0.0538915	0.0567387	0.0552432	0.0548462	0.0566431	0.0343357	0.137188
Hs.253495	0.0365718	0.0425806	0.0496966	0.0417123	0.0304321	0.107212	0.114033	0.0228663	0.0343645
Hs.2549	0.0621082	0.0617352	0.0294538	0.0861588	0.0393249	0.0600415	0.0514962	0.0589701	0.10067
Hs.255093	0.0117394	0.0249508	0.0279398	0.0143698	0.0299021	0.0407661	0.0449504	0.0269725	0.0510971
Hs.2556	0.0324481	0.0168772	0.0349619	0.00946585	0.0408982	0.0160335	0.0062724	0.0204405	0.0217362
Hs.256126	0.0437207	0.0645396	0.173279	0.148899	0.0374245	0.064615	0.0983184	0.208812	0.0604053
Hs.2563	0.0292209	0.0463621	0.0266927	0.0143068	0.0353959	0.0399673	0.0325012	0.0271113	0.0202834
Hs.25647	0.0650794	0.00975608	0.0164348	0.00417437	0.00935332	0.00577262	0.010489	0.012364	0.040127
Hs.25960	0.28193	0.150232	0.300951	0.426546	0.385992	0.586219	0.441586	0.203457	1.23398
Hs.260074	0.0395034	0.0262298	0.0352749	0.0241067	0.0658104	0.0567911	0.00822556	0.00750729	0.0477456
Hs.2624	0.0198294	0.0314991	0.0447473	0.0279281	0.0345849	0.0139402	0.0330123	0.0358125	0.0225612
Hs.265174	0.0106337	0.0988413	0.0361175	0.0401538	0.0285767	0.0881705	0.0769953	0.0424955	0.0526914
Hs.26770	0.0166403	0.0238119	0.0225183	0.00730953	0.0190043	0.00929559	0.00977017	0.0194779	0.0175183
Hs.2681	0.0185097	0.0474284	0.0369939	0.00984168	0.00767208	0.0819075	0.0354345	0.0402577	0.0394274
Hs.268177	0.012392	0.0454473	0.0281153	0.017626	0.0189085	0.0404727	0.0445649	0.0358056	0.0591847
Hs.268490	0.00831041	0.00989076	0.0227773	0.00400744	0.00625389	0.0130928	0.00828408	0.00159054	0.0150524
Hs.269408	0.0647789	0.49583	0.187448	0.285113	0.193698	0.52404	0.598829	0.632765	0.426011
Hs.269782	0.0278815	0.0211871	0.0680989	0.058933	0.0705827	0.038893	0.0663177	0.0375317	0.138466
Hs.270279	0.0278425	0.0230732	0.0305211	0.00918748	0.0207103	0.0076081	0.0173719	0.012148	0.0161356
Hs.270364	0.011117	0.0169701	0.0155573	0.0160428	0.00933563	0.0140862	0.0173312	0.0133498	0.0170987
Hs.271771	0.0518861	0.0598865	0.0205651	0.0391234	0.0118281	0.0322349	0.03604	0.0294721	0.0187731
Hs.271940	0.00868201	0.0432	0.0241763	0.0607924	0.0303724	0.017932	0.0354547	0.026263	0.0353802
Hs.272396	0.0418807	0.0818455	0.00478439	0.0230897	0.0245175	0.0643615	0.0695211	0.0129337	0.0122361
Hs.274313	0.0089566	0.0171285	0.0540282	0.0573238	0.0417035	0.0571327	0.0945823	0.0817182	0.0423925
Hs.2780	0.159077	0.189229	0.118038	0.105604	0.0667682	0.11202	0.180256	0.0785365	0.111454
Hs.278432	0.0166831	0.0248004	0.0271241	0.0180675	0.0241295	0.0122616	0.0212916	0.0123535	0.023607
Hs.278957	0.0312358	0.0569395	0.0492055	0.0167237	0.0260696	0.0603711	0.0125353	0.00202208	0.0386982
Hs.2795	0.000457415	0.00206201	0.000779334	0.000583878	0.000361913	0.00246508	0.00202003	0.000699431	0.000748132
Hs.279567	0.0494919	0.0301532	0.0197205	0.0407544	0.125547	0.0478618	0.0593401	0.0990212	0.180213
Hs.280604	0.0260929	0.0536015	0.0370401	0.0673572	0.0388109	0.0591014	0.0907657	0.055864	0.087043
Hs.281342	0.0162779	0.025975	0.0301626	0.0159962	0.0284626	0.0379267	0.0382388	0.0198191	0.0206831
Hs.2820	0.0344565	0.0420087	0.044773	0.0329628	0.0443294	0.0165232	0.0383813	0.0314153	0.0426196
Hs.282265	0.0385085	0.0270628	0.0255031	0.0327035	0.0317862	0.0290758	0.0306544	0.0245198	0.0864126
Hs.282624	0.0731103	0.0441676	0.0228698	0.00899828	0.0373666	0.123658	0.135352	0.0941555	0.0819224
Hs.282735	0.0472638	0.0382176	0.0580277	0.0241711	0.0324174	0.0371575	0.0255021	0.0179498	0.0255417
Hs.2830	0.0233266	0.0245999	0.0167792	0.0178871	0.045841	0.0340514	0.0496688	0.0175647	0.0343235
Hs.283565	0.0114852	0.0176084	0.0161338	0.0194244	0.00576203	0.013565	0.0116797	0.0102932	0.00577999
Hs.283613	0.0301084	0.0344432	0.044636	0.0484263	0.0254448	0.0543417	0.0266473	0.0136953	0.055926
Hs.283749	0.000677984	0.0109517	0.0160919	0.00223084	0.00726142	0.005939	0.0144884	0.00421451	0.017065
Hs.283923	0.0291344	0.0312981	0.0207679	0.0360411	0.0244621	0.0430638	0.0526149	0.00948916	0.0621152
Hs.283963	0.0203241	0.0412755	0.0208417	0.041687	0.0283881	0.0561513	0.0956334	0.0177072	0.0534298
Hs.284244	0.0511091	0.011595	0.0626612	0.0541945	0.11416	0.0273799	0.0480837	0.0262513	0.13501
Hs.284712	0.00365411	0.00662127	0.0143453	0.034534	0.0255337	0.0115604	0.036817	0.0226667	0.0441321
Hs.287717	0.0235164	0.048165	0.0417413	0.0390686	0.0782546	0.0400556	0.0815323	0.0630761	0.0774784
Hs.2879	0.267207	0.973817	0.728927	0.556747	0.231785	0.49394	0.529803	0.162132	1.4422
Hs.289271	0.0402823	0.0565729	0.0275424	0.0262988	0.053834	0.0724227	0.100726	0.0542239	0.0660417
Hs.290404	0.210826	0.184858	0.133731	0.264235	0.15247	0.37395	0.171029	0.204633	0.453255
Hs.292177	0.00839273	0.0467241	0.0482656	0.0152185	0.0328435	0.0219698	0.0650013	0.0274229	0.0757968
Hs.292356	0.0122729	0.017162	0.0209484	0.0134458	0.00775479	0.00877094	0.0141086	0.0165513	0.0121623
Hs.29344	0.0844455	0.166173	0.178273	0.0471193	0.1483	0.151763	0.189154	0.132008	0.302102
Hs.2936	0.032582	0.0259958	0.0238622	0.0885349	0.0730704	0.125702	0.0892643	0.0328663	0.0648433
Hs.295449	0.0247586	0.0422723	0.0267476	0.0374986	0.00784069	0.0217167	0.0275622	0.0181554	0.026078
Hs.297413	0.0112054	0.00989077	0.0144262	0.00922682	0.00686518	0.00979228	0.0161766	0.01136	0.0162019
Hs.2979	0.0356788	0.0602917	0.056701	0.0430438	0.057355	0.0355174	0.040129	0.0122879	0.0285374
Hs.298280	0.0171867	0.0577079	0.122022	0.0458973	0.0618728	0.00528399	0.0511138	0.0440039	0.0699544
Hs.298658	0.0210148	0.0366548	0.0160723	0.0430436	0.0369205	0.103186	0.0671342	0.0234283	0.0320256
Hs.3003	0.0234079	0.0241413	0.0303709	0.0194905	0.01948	0.0360076	0.0362112	0.0137015	0.0487357
Hs.300774	0.0192473	0.0325752	0.0228541	0.0147396	0.0113446	0.031552	0.0195755	0.00844421	0.014231
Hs.301540	0.0234709	0.0785769	0.0413896	0.0385044	0.0458214	0.0579389	0.0897172	0.0892674	0.108067
Hs.301804	0.0580004	0.0633791	0.0410846	0.0350947	0.0584065	0.125865	0.241992	0.12122	0.0775567
Hs.301865	0.0113993	0.0651761	0.0220554	0.0186741	0.0115258	0.063581	0.0157481	0.00776631	0.0226294
Hs.302002	0.057231	0.0240202	0.00948691	0.0413981	0.0365441	0.0385567	0.0199184	0.00690419	0.021587
Hs.302145	0.0117472	0.00654147	0.0220464	0.0135337	0.00413043	0.00163512	0.00697901	0.00596073	0.0289175
Hs.3022	0.0150187	0.038193	0.0431938	0.157142	0.0171018	0.0487409	0.0691933	0.0495767	0.0397682
Hs.302740	0.0399713	0.0527149	0.0700914	0.00810551	0.0393618	0.0665624	0.0311965	0.00841787	0.103051
Hs.303649	0.013224	0.00770462	0.00931577	0.0107381	0.00907318	0.005729	0.0084523	0.00552109	0.0216666
Hs.303980	0.0237336	0.0626123	0.084444	0.0519191	0.0350739	0.04864	0.0522923	0.0292689	0.0800574
Hs.306178	0.172687	0.141627	0.0453624	0.0967332	0.0391625	0.160265	0.224607	0.0915692	0.184241
Hs.30956	0.0243915	0.0578843	0.0551654	0.0182931	0.0529954	0.0188629	0.0684123	0.0198182	0.0515442
Hs.310893	0.0370198	0.0627086	0.0442791	0.054682	0.0296066	0.0501098	0.0299634	0.0534569	0.0618901
Hs.31210	0.0389222	0.53846	0.551079	0.428503	0.505082	0.807797	0.691485	0.709561	1.12905
Hs.313	0.000369661	0.000818156	0.00125331	0.000547414	0.000329461	0.000737153	0.00121456	0.000336921	0.00119867
Hs.315186	0.0806132	0.0377621	0.0954751	0.0253382	0.0354682	0.0761164	0.0214999	0.0232664	0.0746616
Hs.315562	0.0597558	0.0110798	0.0186622	0.0699685	0.014338	0.0433977	0.0200667	0.0105805	0.0175559
Hs.31720	0.0105547	0.00780389	0.0212967	0.0167023	0.00422656	0.012612	0.0125803	0.00420298	0.0132276
Hs.3210	0.0502553	0.0451544	0.021732	0.0230789	0.0439197	0.0263154	0.0485329	0.0067226	0.0202895
Hs.321045	0.0169716	0.0208369	0.0280705	0.0751854	0.0636286	0.044647	0.101765	0.0174907	0.0219382
Hs.321541	0.0182926	0.0599449	0.0577515	0.0286746	0.0439022	0.0638134	0.0901191	0.0983473	0.101292
Hs.32405	0.0258117	0.0211175	0.0476406	0.050326	0.0346106	0.0535822	0.00886018	0.000202558	0.0281385
Hs.32539	0.0406643	0.0304905	0.0127066	0.0471319	0.0266699	0.055864	0.0188985	0.00762716	0.0269178
Hs.326	0.00649708	0.184086	0.148551	0.0579242	0.113079	0.131774	0.248228	0.0746166	0.188324
Hs.326035	0.547405	0.0200945	0.0250727	0.00573962	0.0132946	0.0160278	0.0162972	0.0134492	0.138609
Hs.32721	0.0364195	0.0356785	0.0318574	0.0399261	0.0210999	0.0710343	0.0247934	0.0344664	0.017204
Hs.327527	0.0207686	0.0350653	0.0328904	0.0193374	0.0253722	0.0286988	0.0482711	0.0283736	0.0439195
Hs.32763	0.0353144	0.0118585	0.0332078	0.0152446	0.0173483	0.0327186	0.0139125	0.0471833	0.0325272
Hs.32938	0.0598797	0.0201437	0.0324991	0.101595	0.0157773	0.061042	0.0267139	0.040606	0.0491558
Hs.329502	0.0304788	0.110912	0.0666652	0.0457368	0.0815066	0.100234	0.11306	0.11017	0.116757
Hs.331420	0.0428703	0.0416643	0.0665601	0.0619884	0.0586957	0.0298836	0.0454856	0.0433268	0.110425
Hs.332708	0.0933199	0.125835	0.133205	0.178346	0.18243	0.176632	0.187857	0.259061	0.270151
Hs.333303	0.00988014	0.0117282	0.0216218	0.00892671	0.00914532	0.00451046	0.0220955	0.0133586	0.0223276
Hs.333791	0.068093	0.0575007	0.0339772	0.0153661	0.0847626	0.0688208	0.0201869	0.00435241	0.0277521
Hs.334019	0.0275229	0.0295219	0.011805	0.0218048	0.0211783	0.0374318	0.0343629	0.0157345	0.0398964
Hs.334347	0.0338689	0.0200409	0.0153397	0.0328068	0.0207134	0.0287646	0.0370515	0.0151108	0.0408633
Hs.33446	0.0272233	0.043415	0.0518434	0.0137394	0.0270798	0.0378608	0.0484081	0.0163823	0.0233808
Hs.334515	0.140095	0.212996	0.0733442	0.0857519	0.0468625	0.0820929	0.0662873	0.0829152	0.167803
Hs.334562	0.0101785	0.0313344	0.0686011	0.050575	0.0607698	0.034714	0.0474046	0.014548	0.0340074
Hs.335084	0.0193772	0.0425973	0.0249154	0.0255775	0.024039	0.0345877	0.0498879	0.0454586	0.0535294
Hs.335918	0.0121644	0.0621466	0.0581672	0.0222083	0.0314792	0.0727938	0.115579	0.0728363	0.0822026
Hs.339831	0.437539	1.04444	0.774069	0.656026	0.314188	0.23848	0.410385	0.0599492	0.916372
Hs.34012	0.0307293	0.0181034	0.0874325	0.0634822	0.0639532	0.0270351	0.0536053	0.00830483	0.0566517
Hs.34114	0.0448136	0.021185	0.0306926	0.0168548	0.013592	0.00302958	0.0246192	0.030795	0.0396412
Hs.34560	0.093927	0.0885989	0.0889222	0.0360128	0.16193	0.219792	0.284099	0.135138	0.504911
Hs.346950	0.0305996	0.0315179	0.0324728	0.0486564	0.0154764	0.0353487	0.0209042	0.00436368	0.0437411
Hs.347270	0.039977	0.0282692	0.0379549	0.030713	0.035053	0.00986891	0.0260309	0.0797684	0.0294848
Hs.348395	0.0327242	0.0423631	0.0398895	0.0303817	0.0680917	0.042883	0.0592922	0.00799027	0.0192647
Hs.348500	0.00962199	0.0603527	0.0121262	0.0780265	0.0312926	0.0214639	0.0476505	0.00459711	0.0346399
Hs.348883	0.0507015	0.00638165	0.00120905	0.0388223	0.040474	0.0194229	0.0151993	0.0418612	0.0755117
Hs.348935	0.00611106	0.0159375	0.0289167	0.0116971	0.0107253	0.0172823	0.00659995	0.00838362	0.0187758
Hs.349110	0.00370653	0.00513547	0.00623928	0.00258019	0.00189785	0.0044581	0.00318643	0.00299077	0.00677887
Hs.349204	0.0655273	0.0649427	0.0598277	0.0530804	0.026442	0.0228776	0.0642554	0.0448988	0.0313306
Hs.349642	0.0641117	0.0558384	0.0491218	0.0200236	0.0683296	0.0763233	0.0305556	0.0133225	0.113527
Hs.350321	0.0107959	0.0097149	0.0108856	0.00910523	0.0128382	0.0101678	0.012833	0.0102397	0.010673
Hs.350966	0.0401099	0.0363024	0.0227844	0.0308944	0.0399556	0.0546297	0.0753583	0.0216422	0.0125557
Hs.351593	0.0146	0.0169356	0.0118595	0.0151459	0.0155894	0.00687095	0.0117646	0.00425268	0.0139251
Hs.351887	0.0186566	0.0541667	0.0183932	0.0235051	0.0257968	0.0462285	0.0263377	0.0405295	0.0296206
Hs.352	0.0117506	0.207014	0.0209419	0.0310566	0.0575073	0.0106572	0.0226315	0.0327661	0.0274837
Hs.356285	0.00415947	0.029283	0.0187496	0.0186603	0.0151883	0.0282741	0.0371588	0.0217785	0.0413126
Hs.356624	0.0706288	0.0126828	0.0598208	0.0620972	0.255224	0.0529156	0.053422	0.138229	0.137059
Hs.35937	0.0264468	0.0556459	0.0316039	0.0934549	0.0246553	0.0997511	0.10277	0.0117241	0.0550428
Hs.359698	0.0177865	0.052642	0.0130529	0.0133424	0.00399558	0.012352	0.00897464	0.0184408	0.0432322
Hs.36	0.0143524	0.0446973	0.0884143	0.0576885	0.00911834	0.12742	0.0134496	0.189726	0.0912923
Hs.36137	0.0227876	0.0619941	0.00707521	0.075476	0.0541251	0.139	0.106984	0.0272569	0.13898
Hs.361463	0.025691	0.0432595	0.0199537	0.0097829	0.0238119	0.0361272	0.0267413	0.0145235	0.0426828
Hs.363137	0.00614606	0.100624	0.0717395	0.0458662	0.043076	0.0591262	0.0718277	0.0914811	0.0969915
Hs.363138	0.0182259	0.108909	0.111351	0.0552684	0.175429	0.203904	0.393095	0.217871	0.478043
Hs.364941	0.0199397	0.0266188	0.0269225	0.0256707	0.0257373	0.0601896	0.0271489	0.0383402	0.0305904
Hs.368149	0.0415695	0.149803	0.0238801	0.0796503	0.0325404	0.0864953	0.0989505	0.0673469	0.0821402
Hs.368153	0.0889986	0.00553602	0.0583245	0.00711448	0.0722056	0.0292921	0.0249639	0.0512648	0.0223279
Hs.368226	0.102298	0.0371469	0.0136183	0.0307595	0.0543101	0.0502743	0.0882521	0.0251018	0.0772948
Hs.368243	0.0118691	0.0104142	0.0282721	0.00594157	0.00368748	0.010447	0.00356106	0.00387212	0.00892431
Hs.368587	0.00715774	0.0142071	0.0089361	0.0231786	0.0167231	0.0091599	0.0207835	0.0100206	0.0162873
Hs.368632	0.0786792	0.064334	0.0400823	0.049601	0.0505764	0.0332596	0.0164589	0.00474355	0.0108425
Hs.368982	0.108097	0.218891	0.127899	0.11152	0.0869798	0.0782189	0.117084	0.0390409	0.24991
Hs.369581	0.076128	0.312101	0.441762	0.283462	0.28978	0.293584	0.592688	0.377117	0.739053
Hs.369646	0.0521552	0.168606	0.0603971	0.0887956	0.113471	0.0858098	0.1295	0.0241848	0.133337
Hs.369675	0.130891	0.169994	0.282168	0.301532	0.705002	0.358942	0.397379	0.0878322	0.548624
Hs.36975	0.035995	0.052423	0.0456717	0.0379121	0.0370023	0.0421881	0.0769151	0.0058947	0.0207236
Hs.369779	0.105001	0.139972	0.367477	0.367029	0.448275	0.194048	0.26326	0.388546	0.559904
Hs.36989	0.189177	0.471846	0.375759	0.0987825	0.172564	0.323242	0.486437	0.116999	0.163267
Hs.37003	0.00642978	0.033122	0.0197663	0.0184471	0.0215693	0.0275152	0.0432646	0.0325492	0.0344744
Hs.37009	0.194634	0.494732	0.345738	0.37551	0.243786	1.25929	0.373468	0.260809	0.927763
Hs.37023	0.034026	0.0341716	0.0390653	0.103919	0.00656609	0.0265772	0.037755	0.0603111	0.0657738
Hs.37045	0.0404524	0.0497137	0.0705504	0.0283397	0.0334709	0.0430135	0.0819207	0.0253617	0.0232969
Hs.370487	0.0127076	0.0263321	0.0331474	0.00962642	0.0351963	0.0304654	0.0149569	0.0162815	0.0846367
Hs.37058	0.0804441	0.161361	0.0464575	0.0682188	0.11779	0.0326618	0.04902	0.0302809	0.0393881
Hs.370581	0.193029	0.154679	0.0930031	0.0820028	0.148206	0.199407	0.19412	0.0462866	0.110996
Hs.370771	0.0276127	0.0740561	0.0705852	0.0588343	0.0912948	0.0841548	0.123287	0.0755691	0.0756325
Hs.37092	0.0244556	0.191099	0.102358	0.0736818	0.0797556	0.119559	0.208302	0.0696791	0.137186
Hs.371036	0.0170929	0.033537	0.0321897	0.0326243	0.00846662	0.102824	0.0136544	0.0630224	0.0212026
Hs.371218	0.0303945	0.296828	0.109817	0.13555	0.0472822	0.387907	0.600163	0.335693	0.367398
Hs.371249	0.00823845	0.0060215	0.0166	0.00615725	0.000345411	0.0135769	0.011072	0.0104968	0.0171653
Hs.371282	0.101338	0.12635	0.115895	0.0222957	0.140458	0.136118	0.189686	0.106676	0.177423
Hs.37135	0.0351421	0.0981118	0.0729844	0.052252	0.103626	0.0503612	0.0348171	0.0972185	0.0794992
Hs.371889	0.0140862	0.0401032	0.0276424	0.015755	0.0311734	0.0293249	0.0434107	0.0287057	0.0251059
Hs.372	0.0223975	0.0453377	0.0444892	0.0304307	0.0333635	0.0496648	0.107594	0.0090636	0.0583418
Hs.372840	0.0301044	0.0360693	0.0397024	0.0373036	0.0278688	0.0178241	0.0348567	0.0111577	0.0421625
Hs.372914	0.00789044	0.0164053	0.0165195	0.00961303	0.0140813	0.0169708	0.0182623	0.0148665	0.0109774
Hs.374596	0.0144043	0.121945	0.0320232	0.0583286	0.0372931	0.0526526	0.0407469	0.0396012	0.0589086
Hs.374668	0.0333132	0.0662578	0.0512517	0.0127347	0.0322378	0.00994179	0.0797834	0.123275	0.0739715
Hs.374990	0.393041	2.87063	2.99261	2.8392	1.1104	3.87391	2.81911	4.15706	2.44904
Hs.375129	0.0129653	0.0345438	0.00722049	0.0276276	0.0111092	0.0146995	0.00148989	0.00956898	0.0144405
Hs.375957	0.00652515	0.0102974	0.00696076	0.00472991	0.0029781	0.00400308	0.00404545	0.00518654	0.00678574
Hs.376071	0.149504	0.270843	0.311545	0.323332	0.24935	0.252911	0.243057	0.141132	0.150554
Hs.37616	0.056429	0.175846	0.0658784	0.141432	0.0664443	0.144815	0.0842693	0.060939	0.141094
Hs.376206	0.0415322	0.0346329	0.0347283	0.0210853	0.0118696	0.0491536	0.0135639	0.0198185	0.0460327
Hs.377010	0.0129994	0.0382793	0.0452598	0.0123615	0.0362841	0.0291468	0.0381931	0.0289932	0.0425298
Hs.377783	0.0473091	0.0757838	0.0253709	0.0640878	0.0757177	0.0937985	0.0789608	0.0174711	0.137461
Hs.377894	0.0365565	0.0520746	0.045017	0.0488234	0.042459	0.0380324	0.0415206	0.0273669	0.0748084
Hs.37860	0.00980558	0.0491784	0.0453313	0.0102489	0.0430188	0.0319994	0.0422933	0.013271	0.0566636
Hs.380135	0.00166587	0.00313876	0.00373226	0.00163138	0.00151013	0.00246335	0.00495854	0.00105491	0.00421231
Hs.380691	0.0935141	0.0660737	0.0740031	0.0423372	0.0181681	0.00988232	0.0601976	0.100422	0.139727
Hs.381099	0.0125893	0.0187365	0.00936437	0.0132364	0.0702694	0.0274013	0.0421712	0.021422	0.014677
Hs.386748	0.00565142	0.0680016	0.00555802	0.0407289	0.0485039	0.0545747	0.0270623	0.01345	0.0735546
Hs.387567	0.0196824	0.0857969	0.096264	0.0406874	0.0465777	0.0523833	0.0881287	0.0754915	0.118197
Hs.388245	0.110822	0.724331	0.544059	0.701826	0.453246	0.796154	0.533078	0.0967156	0.889795
Hs.389137	0.0528537	0.0572867	0.0581339	0.10059	0.164378	0.164497	0.340914	0.175676	0.357907
Hs.389457	0.049421	0.0759924	0.0487316	0.0702352	0.0388886	0.0378081	0.0737159	0.0253196	0.102477
Hs.389700	0.0020637	0.0086335	0.00999826	0.00375174	0.00326314	0.00217648	0.00605043	0.00606859	0.0136151
Hs.391561	11.0738	18.53	9.05635	7.2963	11.2872	3.52387	8.37897	61.3744	5.76143
Hs.395482	0.0268742	0.156494	0.129431	0.0858259	0.0540279	0.125708	0.180919	0.223637	0.221382
Hs.396530	0.00694409	0.00925667	0.00920255	0.0118227	0.00889866	0.0153522	0.0127055	0.00807185	0.00929075
Hs.397609	0.0177174	0.055059	0.0146892	0.0180487	0.0179731	0.0534369	0.0591163	0.049547	0.0231123
Hs.397729	0.0149797	0.070433	0.0425321	0.044885	0.0921553	0.0442311	0.0912541	0.0828046	0.117826
Hs.4	0.00674328	0.0542244	0.0542846	0.078396	0.0728271	0.121576	0.0730452	0.0374246	0.113882
Hs.400295	0.0409033	0.0951885	0.0156798	0.0433966	0.0458467	0.0826701	0.0856825	0.0744001	0.0690824
Hs.401013	0.0124656	0.0334553	0.0205798	0.0301617	0.0247555	0.0217671	0.0108364	0.0358294	0.0268259
Hs.404466	0.0379241	0.0448203	0.0307735	0.063183	0.0147537	0.0671216	0.037515	0.0141894	0.0136579
Hs.40499	0.010793	0.0253056	0.0168709	0.0124013	0.00777832	0.0204062	0.0223272	0.00339464	0.0272214
Hs.405153	0.00219597	0.0197923	0.0390359	0.00565482	0.0150064	0.0393522	0.0345397	0.0290438	0.0163631
Hs.405348	0.021342	0.0442275	0.0561136	0.039543	0.0268431	0.0337548	0.0627143	0.0228896	0.0551515
Hs.405662	0.00334881	0.0240002	0.0137339	0.0159225	0.0100861	0.0126786	0.00522286	0.0346359	0.0182796
Hs.405925	0.0245979	0.116326	0.100208	0.0321658	0.085878	0.232483	0.243831	0.104589	0.0724879
Hs.405958	0.0360893	0.0782142	0.0143981	0.00970344	0.00637486	0.0547958	0.0572835	0.0251266	0.0148202
Hs.406	0.0340013	0.0175473	0.066021	0.0520257	0.0317983	0.0292316	0.0402918	0.0213726	0.0229155
Hs.406013	0.00518558	0.0310961	0.0160731	0.017132	0.00527045	0.0108753	0.0127784	0.00514757	0.012749
Hs.406293	0.0309536	0.0281548	0.036958	0.0136895	0.0562457	0.0415356	0.0298584	0.0410755	0.0283858
Hs.406515	0.146198	0.0482756	0.0995961	0.228419	0.102431	0.150866	0.14293	0.0154381	0.108405
Hs.406678	0.0657126	0.154408	0.0570083	0.0599455	0.115912	0.166602	0.241188	0.191072	0.105513
Hs.406687	0.0211998	0.073022	0.0655584	0.102024	0.0138489	0.0666618	0.0591988	0.0838404	0.0499265
Hs.407506	0.0252462	0.0136576	0.0372019	0.0316622	0.0683794	0.0238577	0.0587156	0.0361614	0.128732
Hs.407587	0.0201459	0.0642868	0.0303836	0.0445113	0.0227447	0.0322345	0.0601021	0.0256153	0.019404
Hs.407856	0.0408528	0.102902	0.0311233	0.0114401	0.0495799	0.0311759	0.0470508	0.0718151	0.113808
Hs.407995	0.0082498	0.0159558	0.00752837	0.00270623	0.00873628	0.0137114	0.015606	0.00923473	0.00510955
Hs.408182	0.0218841	0.0292856	0.0374224	0.0209958	0.0142128	0.037707	0.0114693	0.0139266	0.0371313
Hs.408528	0.0228774	0.0140202	0.0660294	0.0551377	0.0783672	0.025862	0.0409368	0.0235485	0.0710451
Hs.408767	0.0308008	0.0367118	0.0212069	0.0273914	0.0291943	0.0220674	0.0448889	0.00573459	0.0333754
Hs.409934	0.0134531	0.0240147	0.0150501	0.0191608	0.0148014	0.0192715	0.0155006	0.0215714	0.0126174
Hs.410026	0.038421	0.153812	0.0547458	0.0675745	0.145414	0.0281253	0.0426551	0.0675083	0.167852
Hs.410969	0.0448005	0.0277721	0.0158029	0.0151999	0.0288409	0.0286216	0.0989769	0.0322945	0.028037
Hs.411312	0.0189548	0.0508352	0.0728208	0.0273561	0.0382852	0.0294068	0.035437	0.0144767	0.0340013
Hs.411472	0.0410806	0.0551518	0.0461721	0.0165572	0.0306284	0.0688821	0.0161273	0.00581583	0.0238807
Hs.412433	0.0208755	0.104659	0.08082	0.062562	0.0658471	0.118103	0.175972	0.0917718	0.170623
Hs.412484	0.0866783	0.569293	0.352014	0.192494	0.226611	0.11704	0.133056	0.0630594	0.107056
Hs.412710	0.0299211	0.174606	0.0425338	0.0543788	0.0468	0.0777322	0.0571976	0.0601681	0.0960723
Hs.413899	0.0306048	0.0380421	0.0233437	0.027422	0.0239174	0.0232848	0.0385746	0.0284557	0.0258839
Hs.414795	0.00744039	0.00978142	0.0108411	0.00800659	0.00766833	0.0122812	0.0131078	0.0117798	0.0126495
Hs.415058	0.0281235	0.0637811	0.0850255	0.0828333	0.0545152	0.0756236	0.235079	0.128162	0.284241
Hs.415117	0.268693	0.125636	0.0577335	0.399022	0.202526	0.142217	0.103409	0.141433	0.209455
Hs.415768	0.0319297	0.0570818	0.0341847	0.0376683	0.0167176	0.0138916	0.0323959	0.0175393	0.0338192
Hs.417050	0.0267596	0.0332105	0.00337717	0.0300504	0.0094657	0.00821968	0.0126574	0.054381	0.0353748
Hs.417962	0.010114	0.0307595	0.0424362	0.0173427	0.0424699	0.047875	0.0376817	0.0103035	0.0563926
Hs.418012	0.0340445	0.0038093	0.046463	0.0561789	0.0271561	0.0438323	0.0378026	0.0192824	0.0767943
Hs.418167	0.0197366	0.00776124	0.0110014	0.00905018	0.00640747	0.0159511	0.0166077	0.00391394	0.00603766
Hs.419240	0.00584808	0.00750558	0.0108412	0.00771261	0.0129989	0.00620017	0.00560044	0.00818809	0.00784431
Hs.420036	0.0237418	0.0610466	0.0424784	0.0277759	0.0484859	0.070951	0.0553862	0.0264727	0.0607758
Hs.420830	0.0171319	0.0312219	0.0700038	0.0320688	0.0518092	0.0411013	0.050801	0.0215056	0.0474072
Hs.421202	0.0415544	0.0654757	0.0426505	0.0262306	0.0706911	0.0674791	0.0960777	0.0571922	0.0440696
Hs.42146	0.0190649	0.0237609	0.0281259	0.0105189	0.0267766	0.0243882	0.0688592	0.0238483	0.0236247
Hs.421509	0.0793598	0.0953326	0.0757799	0.0432414	0.0395751	0.0958232	0.0896523	0.1248	0.0992082
Hs.424414	0.018886	0.0515606	0.0345985	0.0554952	0.0691516	0.0911131	0.105104	0.0776116	0.0925449
Hs.426485	0.017243	0.00912275	0.0610329	0.047121	0.0723141	0.0284541	0.0583966	0.0405483	0.05182
Hs.427055	0.00141836	0.0166808	0.00822053	0.0250538	0.00701719	0.0451825	0.0355548	0.0274793	0.0146241
Hs.427202	0.00181313	0.00431728	0.0144881	0.00319537	0.00311004	0.00426199	0.0114828	0.00765087	0.0156354
Hs.42853	0.0351418	0.0593026	0.0303458	0.0435156	0.0554716	0.0703648	0.0950475	0.057129	0.0963483
Hs.42949	0.0100175	0.0418996	0.0541098	0.032716	0.0437905	0.0998887	0.109197	0.0175526	0.160337
Hs.429596	0.00362829	0.0297914	0.0482517	0.0470997	0.0268528	0.0729051	0.0300909	0.0575441	0.0430316
Hs.429879	0.0136748	0.119633	0.110238	0.0368496	0.229795	0.0554729	0.1479	0.122371	0.106823
Hs.430551	0.015258	0.0120249	0.0675245	0.0401209	0.0436179	0.0184491	0.0551017	0.0411388	0.0540342
Hs.431048	0.0095803	0.0111358	0.0137216	0.00990198	0.0145859	0.0182243	0.0283428	0.0215675	0.020932
Hs.431417	0.112112	0.0424633	0.0482402	0.0939558	0.0733622	0.113303	0.0775246	0.0377991	0.128513
Hs.431498	0.0262391	0.182907	0.149427	0.0656218	0.138656	0.176051	0.211656	0.318511	0.345197
Hs.431850	0.0121985	0.00767349	0.0101906	0.0160352	0.0140222	0.00616617	0.00538546	0.00390594	0.0191321
Hs.432752	0.125303	0.0634565	0.0354575	0.0578275	0.0769589	0.102933	0.0951336	0.0321344	0.169741
Hs.432976	0.013075	0.0247439	0.0571802	0.0231402	0.0447392	0.068168	0.115845	0.0401026	0.0669397
Hs.433068	0.0441636	0.0456879	0.0590634	0.065591	0.0614397	0.0828075	0.0847005	0.152353	0.195747
Hs.43314	0.0425975	0.0661019	0.0354542	0.0398966	0.0917179	0.0851433	0.131696	0.163281	0.101941
Hs.433300	0.0149863	0.0674401	0.0353724	0.0274441	0.0376826	0.0419344	0.0546979	0.0524353	0.0627521
Hs.433419	0.0218038	0.0752009	0.0548034	0.0365028	0.03361	0.0688299	0.0873448	0.0580061	0.0753329
Hs.434059	0.028957	0.0343197	0.0591255	0.0380333	0.0393803	0.021228	0.0421335	0.0386611	0.0569547
Hs.434980	0.129738	0.0936976	0.292789	0.210791	0.133654	0.270973	0.337545	0.439848	0.254444
Hs.435136	0.0338564	0.00870357	0.0369675	0.0271525	0.0357037	0.0120024	0.00660408	0.00947117	0.00916888
Hs.435609	0.0411842	0.0464622	0.04616	0.0486905	0.0563494	0.0237651	0.0356311	0.0193796	0.0395759
Hs.435735	0.0236875	0.0221529	0.0168134	0.0252598	0.0172484	0.0225853	0.0240999	0.0201442	0.0339056
Hs.435771	0.0376301	0.04256	0.0862531	0.0639703	0.0765411	0.0351611	0.0643647	0.0517767	0.0869658
Hs.436023	0.0292992	0.0443632	0.053584	0.0675178	0.0185452	0.111911	0.0438765	0.349792	0.0462181
Hs.436061	0.0744223	0.102655	0.145836	0.0970333	0.133209	0.153191	0.290853	0.166357	0.303044
Hs.436181	0.0443949	0.0600662	0.0266223	0.0293427	0.0391498	0.021572	0.0242025	0.0126548	0.0724117
Hs.436317	0.083404	0.0555608	0.0225897	0.0220509	0.0384755	0.0384553	0.0457112	0.00744362	0.0152837
Hs.436416	0.0264989	0.0568853	0.0750498	0.0834141	0.0860641	0.0777944	0.0858198	0.0828541	0.0925146
Hs.436657	0.0240538	0.0337112	0.0173163	0.0248765	0.0139048	0.0225597	0.0475712	0.0172585	0.036128
Hs.436873	0.0315159	0.0146653	0.0696051	0.0727233	0.0920378	0.038065	0.0661782	0.0210482	0.105504
Hs.436885	0.0279181	0.0415091	0.0275519	0.0521857	0.0312862	0.0637864	0.0390493	0.0131609	0.0612359
Hs.436911	0.00230406	0.00655705	0.0104841	0.00380835	0.00556263	0.0079811	0.00754815	0.00204146	0.0101854
Hs.436975	0.186103	0.0927939	0.403811	0.193426	0.382549	0.174203	0.287984	0.193566	0.481273
Hs.437060	0.023068	0.0490015	0.0384358	0.0277229	0.0273454	0.0181439	0.0250329	0.0202662	0.0402747
Hs.437322	0.054522	0.018041	0.0239845	0.0419261	0.0283457	0.0213334	0.0199234	0.0251448	0.00740713
Hs.437609	0.0444073	0.173152	0.298929	0.223462	0.247507	0.110914	0.256764	0.333584	0.346598
Hs.437705	0.0490351	0.0807389	0.0700112	0.0298237	0.0540959	0.041728	0.0529456	0.0268927	0.0683271
Hs.437905	0.0268385	0.0616241	0.0337143	0.0513619	0.0604839	0.00993136	0.0266927	0.0194857	0.0648857
Hs.438016	0.0380912	0.0455687	0.0269988	0.0346282	0.0346223	0.066924	0.069749	0.126678	0.0472548
Hs.438102	0.00166711	0.0101362	0.0149108	0.00204425	0.00809755	0.0179936	0.0181613	0.00867364	0.00732575
Hs.438231	0.00855688	0.00427311	0.0139952	0.0054114	0.00194278	0.00536281	0.00533948	0.0068685	0.00757325
Hs.438265	0.0288904	0.016639	0.0279447	0.0284546	0.0228038	0.0314787	0.014956	0.0224876	0.0350249
Hs.438678	0.0130299	0.0702836	0.0488596	0.041798	0.0294881	0.0604739	0.0826797	0.0490437	0.0508117
Hs.438838	0.0361532	0.258762	0.180487	0.110158	0.118089	0.174092	0.289004	0.316992	0.342837
Hs.438863	0.00641298	0.00560587	0.00584043	0.0154864	0.00457174	0.0154923	0.00985081	0.00236724	0.0216939
Hs.438918	0.0295462	0.0534936	0.0203376	0.0219663	0.016717	0.0355623	0.0409364	0.0369183	0.0202168
Hs.439056	0.0272774	0.0220517	0.0846201	0.0161635	0.0217955	0.0584205	0.0507629	0.013745	0.00328451
Hs.439312	0.0378105	0.0476308	0.0171233	0.031068	0.0117195	0.0360972	0.0193628	0.0399143	0.0376784
Hs.439777	0.0135642	0.00898668	0.0236477	0.0164478	0.00997845	0.0138064	0.0092989	0.00975401	0.0287889
Hs.440379	0.0143039	0.0330251	0.0150171	0.0127042	0.0255717	0.0306946	0.0152747	0.0193912	0.0234718
Hs.440438	0.0306308	0.116794	0.0906348	0.0743789	0.125212	0.193053	0.278368	0.14263	0.216616
Hs.440829	0.740418	0.514928	0.291431	0.485681	0.543623	0.372614	0.582314	0.657434	0.956696
Hs.440895	0.0169072	0.0165442	0.0171548	0.0180757	0.0239611	0.033671	0.0210406	0.0144113	0.0190099
Hs.440934	0.0144335	0.0571604	0.0242125	0.0419479	0.0335078	0.0137966	0.0355816	0.0141246	0.0209984
Hs.441047	0.000835708	0.00106748	0.00164426	0.00119765	0.000606923	0.000946661	0.00137536	0.00130575	0.00163043
Hs.441113	0.00193475	0.0030965	0.00479102	0.00293885	0.00346061	0.00315755	0.00366227	0.00334721	0.00488769
Hs.44227	0.0723501	0.0615802	0.0550656	0.043815	0.0640151	0.024066	0.0421158	0.0338692	0.0129588
Hs.442344	0.0229404	0.0511327	0.0322474	0.0374524	0.0235834	0.0730148	0.0274679	0.0028686	0.0855911
Hs.443625	1.2053	4.94951	1.79891	2.21958	1.50398	1.25695	1.05208	2.26568	1.54464
Hs.443650	0.0211964	0.139816	0.0518736	0.0941156	0.0929373	0.203691	0.226058	0.0802948	0.0967928
Hs.443914	0.0117431	0.00929382	0.00853068	0.0112358	0.00751197	0.0124149	0.0163904	0.0035157	0.00446195
Hs.444082	0.0183149	0.255213	0.145491	0.130987	0.0887157	0.161804	0.165921	0.0954389	0.126156
Hs.444212	0.0188458	0.00714614	0.0289058	0.0134153	0.0060825	0.00460585	0.0165554	0.0923892	0.0166853
Hs.444448	0.0687057	0.0895389	0.094265	0.0557762	0.118535	0.15998	0.156118	0.103779	0.247711
Hs.444959	0.0855825	0.396054	0.0574685	0.285824	0.127537	0.250792	0.432227	0.496421	0.736058
Hs.445040	0.0641349	0.0546092	0.103688	0.080574	0.160654	0.0541442	0.103016	0.0116387	0.197782
Hs.445358	0.0132878	0.00582954	0.0140721	0.0112529	0.00454716	0.00632592	0.0139643	0.00233847	0.00754381
Hs.445534	0.0558043	0.0455228	0.0259141	0.0429099	0.057553	0.0509924	0.0799511	0.0223791	0.0411432
Hs.445757	0.0947888	0.244186	0.0736696	0.174571	0.0458811	0.0967641	0.0627888	0.0974796	0.143771
Hs.445758	0.110592	0.301587	0.0947808	0.133546	0.0848605	0.11948	0.2128	0.15752	0.162103
Hs.445827	0.0408354	0.077337	0.0351978	0.0196477	0.0457035	0.0750688	0.125083	0.124927	0.092013
Hs.445898	0.0206224	0.0308507	0.00464187	0.0166325	0.0160732	0.0157788	0.00964225	0.00109346	0.014899
Hs.446309	0.0435318	0.0119859	0.0428871	0.0425935	0.0617013	0.027255	0.0115826	0.0335501	0.0846082
Hs.446352	0.00820285	0.0336982	0.0302874	0.0294116	0.0275499	0.0224083	0.0350626	0.0295866	0.027361
Hs.446414	0.0704853	0.169985	0.0897703	0.0518862	0.168577	0.151303	0.121654	0.200014	0.276835
Hs.446429	0.103193	0.237073	0.223598	0.196628	0.0564896	0.183924	0.192619	0.119911	0.489089
Hs.446683	0.0500462	0.0200709	0.0830837	0.0903311	0.0701562	0.038822	0.0490901	0.0429028	0.0816973
Hs.447793	0.0419553	0.052002	0.0279366	0.0478227	0.0260448	0.022046	0.0265117	0.0227172	0.0198912
Hs.447968	0.0289805	0.03605	0.0710271	0.0308432	0.00455699	0.0260544	0.0421888	0.0769679	0.0156142
Hs.449630	0.00402153	0.0109132	0.0148613	0.00748142	0.0116795	0.00821143	0.0138694	0.00426142	0.0247605
Hs.449738	0.00775165	0.0246861	0.011053	0.018298	0.0208182	0.0314268	0.0234609	0.0238808	0.015416
Hs.449968	0.00287177	0.0134971	0.0154223	0.0191787	0.0044987	0.0103809	0.0152879	0.00630682	0.0180265
Hs.450230	0.0142033	0.0125465	0.0120963	0.0214061	0.0117418	0.00695754	0.0124349	0.0099593	0.00814618
Hs.455323	0.0235295	0.0134541	0.0280616	0.0105349	0.0403222	0.0267195	0.0333902	0.00319145	0.0649757
Hs.458272	0.0523029	0.0143341	0.00491772	0.0192981	0.0067804	0.0253882	0.040991	0.0265256	0.0769002
Hs.458406	0.434203	0.386196	0.239592	0.601287	0.268004	0.293585	0.409602	0.171691	0.860664
Hs.458414	0.0180989	0.0749613	0.0732476	0.0300952	0.0535998	0.0921856	0.149504	0.0609467	0.177551
Hs.458426	0.0361046	0.0556832	0.0944815	0.0808092	0.0545927	0.10116	0.0846851	0.0401659	0.0985116
Hs.458482	0.0476996	0.0380349	0.0748974	0.0382127	0.0394325	0.0523946	0.0147624	0.00103408	0.0320905
Hs.458485	0.0257513	0.0526058	0.0510182	0.0374355	0.0435114	0.0587749	0.0794763	0.0313493	0.0881694
Hs.459649	0.0200391	0.0210167	0.0289453	0.0698685	0.0854737	0.078641	0.204345	0.0539259	0.0853518
Hs.459927	0.0325533	0.0285362	0.0308941	0.0174809	0.240626	0.0234592	0.0235967	0.0177105	0.0519284
Hs.460	0.0206135	0.014747	0.0252148	0.0242386	0.0121441	0.0239385	0.0176237	0.013348	0.0312255
Hs.460109	0.0241742	0.016926	0.0333389	0.0297719	0.0297864	0.0213363	0.0486566	0.0142455	0.0541706
Hs.460645	0.0528164	0.0537173	0.14033	0.155893	0.312625	0.0441129	0.13333	0.0139688	0.394056
Hs.461047	0.0310784	0.030831	0.00576572	0.0491044	0.00452688	0.00249629	0.0335711	0.0246778	0.0429971
Hs.461086	0.00129539	0.00145399	0.001877	0.00104831	0.000602941	0.000919173	0.000968773	0.000748697	0.00156686
Hs.463059	0.0121875	0.0191181	0.0196151	0.0173448	0.0260417	0.0212944	0.0293378	0.0342013	0.0427886
Hs.46320	0.0128149	0.0445648	0.0264668	0.0343831	0.0297498	0.0379159	0.0388796	0.0118073	0.04428
Hs.463300	0.0143953	0.0220755	0.0334764	0.0110216	0.0241595	0.0236667	0.0444567	0.0334933	0.042661
Hs.464137	0.0544839	0.193506	0.0428627	0.0423611	0.0547858	0.131245	0.169102	0.119979	0.0444046
Hs.464829	0.0153111	0.0223468	0.0268857	0.0145717	0.000685827	0.00755905	0.0178679	0.00476603	0.0273193
Hs.465087	0.0472176	0.0239168	0.0414209	0.0382878	0.0203779	0.00994266	0.101314	0.105485	0.0712521
Hs.465642	0.0406179	0.0488473	0.0765223	0.040692	0.0203422	0.0673759	0.127887	0.0944542	0.0638965
Hs.465744	0.0466355	0.0367397	0.00792426	0.0464167	0.0270599	0.0291509	0.135031	0.0234406	0.0272124
Hs.465778	0.039756	0.038614	0.0976442	0.0506349	0.0296926	0.0288489	0.0221399	0.0368139	0.081089
Hs.465929	0.009155	0.048131	0.0885548	0.0590912	0.0582718	0.113625	0.0526644	0.0137512	0.060401
Hs.467020	0.0177129	0.188327	0.468829	0.155134	0.328804	0.434984	0.412766	0.284352	0.259332
Hs.467554	0.0755018	0.0452263	0.0185521	0.0459451	0.147598	0.043593	0.0665867	0.152954	0.0294236
Hs.467701	0.115403	0.216602	0.313252	0.181384	0.0746286	0.133827	0.0685284	0.0314702	0.180836
Hs.468274	0.0135745	0.0630068	0.0882046	0.0233969	0.0518609	0.0396821	0.0625228	0.0500699	0.0399668
Hs.46835	0.0543525	0.0286381	0.0607456	0.0435238	0.0449114	0.0310936	0.108967	0.00594888	0.0707881
Hs.468410	0.00870451	0.00964966	0.0142178	0.017315	0.0236043	0.0165001	0.0190076	0.0353378	0.0285055
Hs.468490	0.0482651	0.0880417	0.0918073	0.0455344	0.100311	0.0677635	0.0585074	0.00125045	0.0566963
Hs.469116	0.0356745	0.0388638	0.0351629	0.018146	0.0239146	0.016298	0.0419161	0.0321747	0.0344128
Hs.469264	0.167708	0.117055	0.0797293	0.127287	0.0792857	0.116707	0.147073	0.164604	0.0731179
Hs.470627	0.00328507	0.00501758	0.00736832	0.00515351	0.00417403	0.00466656	0.0049079	0.00275865	0.00573877
Hs.471014	0.0176878	0.0505763	0.0183455	0.0569906	0.0363504	0.0423388	0.0458729	0.0658587	0.0741088
Hs.471508	0.18508	0.131184	0.0363346	0.211694	0.078708	0.0183363	0.0213257	0.067582	0.15265
Hs.472010	0.00503114	0.0223034	0.0140928	0.00548619	0.00350302	0.018039	0.0213111	0.025012	0.0180611
Hs.472860	0.00808249	0.0138964	0.0107343	0.0124286	0.00810771	0.012149	0.0149474	0.00854525	0.0211194
Hs.473152	0.0459718	0.0428084	0.0323993	0.0497672	0.0227896	0.0227622	0.0349223	0.008958	0.0955018
Hs.473163	0.0211381	0.0820674	0.0678208	0.0672909	0.0873674	0.076295	0.111933	0.0874345	0.114319
Hs.473470	0.164323	0.162291	0.397977	0.337061	0.3548	0.273847	0.31622	0.0381743	0.400359
Hs.473583	0.0296676	0.0900769	0.101954	0.096503	0.0555262	0.0416057	0.0845095	0.0463993	0.058857
Hs.474781	0.0338183	0.0354541	0.024034	0.0268258	0.0169576	0.0402003	0.0256206	0.00122315	0.0606436
Hs.474787	0.0306118	0.0362942	0.048123	0.0642948	0.0279825	0.00796765	0.0100144	0.00239485	0.0304862
Hs.475733	0.0574806	0.0248376	0.197333	0.164075	0.276363	0.0950496	0.173803	0.105765	0.319827
Hs.476179	0.0265311	0.0694647	0.0296888	0.028368	0.0233085	0.0552347	0.0671929	0.0445438	0.0549293
Hs.476218	0.0316906	0.0318911	0.0288256	0.00532085	0.00305405	0.0168907	0.0437665	0.0088713	0.0360658
Hs.476308	0.0195652	0.0328577	0.0445343	0.0410149	0.0489433	0.0720757	0.079024	0.0451736	0.0751272
Hs.477866	0.194085	0.187301	0.417651	0.538285	1.01756	0.437433	0.671701	0.545735	1.25576
Hs.477879	0.052174	0.0460407	0.0244677	0.0246155	0.0453284	0.0540388	0.0820655	0.0650588	0.0329164
Hs.477887	0.0267275	0.0555498	0.0168288	0.0217385	0.0398466	0.0100394	0.024167	0.0202904	0.0156102
Hs.478588	0.0941101	0.0423422	0.0567616	0.0874225	0.160892	0.0566981	0.079835	0.075295	0.190847
Hs.479754	2.08589	4.19453	2.81377	2.86165	3.7793	3.51532	7.03851	9.66689	14.1308
Hs.479756	0.0229485	0.021167	0.055014	0.050682	0.0255628	0.0966537	0.0933945	0.0507499	0.0428352
Hs.480218	0.0245959	0.0464084	0.0128534	0.0154778	0.0106815	0.0234715	0.00392184	0.019887	0.0185361
Hs.481371	0.108617	0.148264	0.0899027	0.115894	0.0136227	0.147264	0.247187	0.236141	0.336984
Hs.482562	0.0454404	0.10108	0.0290362	0.037072	0.00162918	0.0612199	0.0966842	0.103877	0.0318386
Hs.48297	0.030639	0.161287	0.192792	0.159721	0.167369	0.129738	0.160607	0.119562	0.294658
Hs.483239	0.00624286	0.0176095	0.0127764	0.00393346	0.0158011	0.0102358	0.0119162	0.00803903	0.0404258
Hs.483519	0.0404688	0.0125171	0.0254966	0.0595644	0.0341494	0.0320573	0.0540483	0.0552074	0.0181965
Hs.483765	0.0388743	0.017752	0.0256709	0.00755178	0.0171955	0.030714	0.0202479	0.0224682	0.0381662
Hs.484738	0.0136657	0.0287557	0.0332485	0.0157979	0.0206216	0.0281118	0.0373885	0.0242358	0.0364241
Hs.485104	0.0332603	0.0475392	0.0297152	0.023524	0.0109525	0.0327996	0.0277055	0.0225533	0.035945
Hs.485130	0.0150273	0.0221838	0.0252625	0.00562025	0.0089466	0.00897865	0.0152673	0.00465661	0.0287438
Hs.485438	0.0758075	0.0275985	0.0405597	0.0356022	0.0322903	0.0311477	0.0344947	0.0159761	0.0407878
Hs.4865	0.0314292	0.0410912	0.0225412	0.0301642	0.0557012	0.0380173	0.0257225	0.019062	0.0180175
Hs.486502	0.0333124	0.133146	0.0774216	0.0425229	0.0212125	0.0508713	0.0838962	0.0165976	0.0630354
Hs.487046	0.0250601	0.0313048	0.0253446	0.0249441	0.0157031	0.0163392	0.0176458	0.0362274	0.0484181
Hs.487062	0.0438446	0.129887	0.182305	0.0634642	0.202448	0.238727	0.169175	0.130393	0.174439
Hs.488293	0.0862294	0.0457761	0.0944129	0.199454	0.116696	0.0518639	0.0612612	0.0765401	0.126367
Hs.489033	0.066983	0.189958	0.161791	0.121811	0.100437	0.13568	0.254234	0.301402	0.350574
Hs.489127	0.0323975	0.0362638	0.0417807	0.0443201	0.0251657	0.162869	0.0129467	0.0204659	0.0112819
Hs.489142	0.00157376	0.00173912	0.0014624	0.00226846	0.00270592	0.00239736	0.00334038	0.00264392	0.00272057
Hs.489786	0.00833545	0.00963176	0.0169284	0.0117187	0.0180177	0.0248997	0.0159436	0.0188178	0.0138755
Hs.490330	0.032771	0.304013	0.293564	0.204197	0.0994391	0.412626	0.447224	0.0625115	0.444583
Hs.491494	0.0217206	0.381082	0.0957959	0.037806	0.0311328	0.0712138	0.0707562	0.0388902	0.0754813
Hs.491582	1.87139	2.84864	3.07536	1.45083	2.72113	3.20354	2.54472	1.95602	2.65809
Hs.492280	0.0218894	0.0596689	0.028675	0.0522763	0.0798333	0.0593479	0.113969	0.0629348	0.0859974
Hs.492333	0.163781	0.157416	0.59603	0.453224	0.29828	0.0932304	0.315003	0.246031	0.748664
Hs.494312	0.0145062	0.0296218	0.0189712	0.0182419	0.0295839	0.0151283	0.0239247	0.0290673	0.0423123
Hs.494529	0.0956214	0.24018	0.147416	0.13024	0.19248	0.400323	0.32445	0.0390417	0.773324
Hs.494538	0.0708628	0.0865275	0.07703	0.0903408	0.35678	0.210381	0.240798	0.236084	0.319816
Hs.494622	0.0153862	0.0284922	0.0436315	0.0398722	0.0602024	0.0206781	0.0434469	0.0980914	0.0500492
Hs.495108	0.0192523	0.0194724	0.0592635	0.0334566	0.0338101	0.0851378	0.0771561	0.0193932	0.0202443
Hs.495473	0.00942484	0.00960351	0.0157302	0.0131874	0.0165632	0.0175246	0.0223117	0.00943569	0.0218324
Hs.495912	0.0132322	0.015107	0.0131863	0.011581	0.0175822	0.0297583	0.0160355	0.0180252	0.0159475
Hs.495985	0.063979	0.0509859	0.00440448	0.00312379	0.0628614	0.0755905	0.196333	0.125702	0.192212
Hs.496240	0.0207224	0.0826891	0.0535111	0.0371036	0.0194765	0.0871615	0.0417466	0.0244195	0.0695841
Hs.496270	0.066951	0.0216882	0.0238343	0.0163361	0.0407827	0.0328833	0.031952	0.0408465	0.00528338
Hs.497589	0.0225858	0.0190596	0.0131396	0.0403853	0.017046	0.0374397	0.0339175	0.0411806	0.0278441
Hs.497599	0.00759518	0.0602928	0.0440636	0.0429503	0.0305194	0.0264282	0.0323138	0.0255303	0.0465371
Hs.498248	0.0120844	0.0371899	0.0351937	0.0312037	0.0207474	0.03022	0.0241751	0.0174465	0.035954
Hs.498494	0.0342821	0.0773878	0.0796754	0.0576693	0.0951356	0.0933396	0.115902	0.0602081	0.0633893
Hs.4998	0.0241638	0.000289198	0.0325309	0.0261464	0.0265706	0.0134676	0.0281692	0.0175621	0.00686879
Hs.499839	0.0163295	0.0259624	0.0111904	0.00813939	0.0134264	0.0298761	0.0445867	0.0344668	0.0248391
Hs.50002	0.0489906	0.0843346	0.0224058	0.0344439	0.0475134	0.167089	0.0418468	0.00692589	0.0972625
Hs.500466	0.0349552	0.0579065	0.117999	0.117112	0.12541	0.0657481	0.11073	0.0962253	0.186248
Hs.500483	0.412141	2.1674	0.979302	0.844981	0.295452	0.717143	0.886732	0.544551	0.675418
Hs.500756	0.0227945	0.0728923	0.0548453	0.0569112	0.0428451	0.0402868	0.0651769	0.0475934	0.0630115
Hs.501023	0.0479258	0.0719161	0.0419053	0.0440463	0.0371428	0.144195	0.173278	0.226927	0.0452001
Hs.501452	0.0295431	0.0529939	0.0744042	0.0694982	0.0785697	0.0765758	0.074774	0.0674841	0.079668
Hs.501629	0.0325793	0.0112941	0.0132601	0.00513157	0.0148881	0.0115069	0.019166	0.0152651	0.0298821
Hs.501778	0.24395	0.800182	0.597729	0.239468	0.425864	0.651908	1.32401	1.16735	1.34601
Hs.502182	0.0959058	0.0885238	0.0712846	0.081276	0.0105994	0.0726896	0.0880075	0.0389822	0.118763
Hs.50223	0.00608198	0.00515021	0.00960831	0.00172855	0.00255264	0.00843695	0.0041053	0.00394065	0.00864216
Hs.502302	0.0628867	0.113494	0.0746673	0.0724824	0.100776	0.121428	0.183798	0.121074	0.163668
Hs.502328	0.0191216	0.0204112	0.0198385	0.0348151	0.0173663	0.0149482	0.020638	0.0209291	0.0166661
Hs.502511	0.10586	0.824639	0.504793	0.33806	0.510919	0.933457	0.372303	0.0538943	1.1468
Hs.502769	0.00880803	0.0354335	0.0418044	0.0419228	0.0273173	0.0343646	0.0566081	0.0316561	0.0481276
Hs.502823	0.0191984	0.0972263	0.0811171	0.0476392	0.0384789	0.0974929	0.136848	0.0808939	0.0986368
Hs.502829	0.0459977	0.0501547	0.0187626	0.0162931	0.0380298	0.0308364	0.0346382	0.0480826	0.0217188
Hs.502875	0.0147314	0.019138	0.0106006	0.0110602	0.0143156	0.0180862	0.0250854	0.0217945	0.0196881
Hs.503043	0.0390467	0.11634	0.0937343	0.0921703	0.102319	0.129749	0.126792	0.156758	0.157737
Hs.503284	0.150605	0.258664	0.237235	0.163769	0.253906	0.4019	0.631031	0.564562	0.485703
Hs.503555	0.00416175	0.00429371	0.00550636	0.00167942	0.00162847	0.0019777	0.00573072	0.00238917	0.0053409
Hs.503878	0.0190342	0.0278705	0.0246297	0.0208832	0.0210846	0.0239384	0.0131668	0.0326577	0.0337949
Hs.503911	0.00027947	0.00495121	0.00322041	0.00433967	0.00453547	0.00560315	0.00626141	0.00267967	0.00527191
Hs.504003	0.0623771	0.0713455	0.0165491	0.03985	0.0986139	0.182624	0.212323	0.0839232	0.284279
Hs.504048	0.00158521	0.00565533	0.0105444	0.00417777	0.00240987	0.00688186	0.00646282	0.0764002	0.00992749
Hs.504281	0.0223552	0.0228671	0.019576	0.0292997	0.00950891	0.0192687	0.0281346	0.0304871	0.00915775
Hs.504609	0.00720617	0.00392482	0.0221335	0.0112767	0.00529	0.00760493	0.0147566	0.0110537	0.0110247
Hs.504966	0.0335847	0.00674171	0.0262462	0.012497	0.0127231	0.0419245	0.0707762	0.0142671	0.0338649
Hs.505033	0.0247368	0.0176321	0.056116	0.0451717	0.0678989	0.0271044	0.0377861	0.0206308	0.0486234
Hs.505654	0.066354	0.109113	0.0876884	0.0981353	0.148752	0.0620808	0.103618	0.106011	0.0749682
Hs.505777	0.105735	0.204779	0.109394	0.0739263	0.203892	0.0453277	0.108141	0.0954683	0.0744502
Hs.505924	0.0256634	0.671961	0.263561	0.269354	0.376431	0.236668	0.0817048	0.0596386	0.0461753
Hs.50640	0.0364583	0.0383211	0.0405269	0.0229132	0.0739661	0.0586607	0.0647002	0.0480255	0.0744958
Hs.506659	0.0192139	0.015489	0.0195788	0.018846	0.0277517	0.0366636	0.0515784	0.0146432	0.00911925
Hs.506759	0.0267447	0.0446987	0.024577	0.0358608	0.0483335	0.0633034	0.0603157	0.0628464	0.0238323
Hs.507475	0.035483	0.0584649	0.122406	0.12608	0.139565	0.0584604	0.087693	0.0382732	0.110446
Hs.507658	0.0177543	0.0347804	0.00946903	0.0336682	0.0128215	0.0320553	0.0258044	0.00612842	0.0309529
Hs.508234	0.0540634	0.0429501	0.0465019	0.0457483	0.0309534	0.0468225	0.0639502	0.0344387	0.0796515
Hs.508716	0.135603	0.89771	0.879666	0.830656	0.92525	0.844078	1.55417	1.0047	1.54856
Hs.508835	0.0268086	0.0472504	0.0242315	0.0523023	0.0292935	0.0328386	0.0337163	0.0283155	0.0448272
Hs.508950	0.0448834	0.0323805	0.0285169	0.030762	0.0522916	0.0941755	0.0801558	0.154784	0.0385983
Hs.509067	0.0942503	0.153444	0.202194	0.22744	0.246771	0.236262	0.388631	0.407714	0.388014
Hs.510334	0.00391841	0.00764762	0.0113245	0.00826976	0.00542606	0.00814517	0.00697959	0.00453508	0.0124348
Hs.510521	0.0130276	0.0334755	0.0203036	0.0451752	0.0214917	0.0428247	0.046867	0.0567571	0.0384725
Hs.510635	0.0112481	0.0143818	0.0160748	0.00981395	0.0135196	0.014414	0.0113893	0.0114077	0.0170805
Hs.511143	0.0127826	0.0946666	0.137807	0.0878508	0.126412	0.0909793	0.117789	0.239626	0.176302
Hs.511899	0.00892389	0.00745446	0.00909259	0.00753699	0.00684846	0.00740306	0.00962009	0.00543205	0.00547871
Hs.512152	0.0115283	0.0254112	0.023126	0.0199974	0.025345	0.0200836	0.0335421	0.0170299	0.0346817
Hs.512382	0.041922	0.157374	0.136622	0.146625	0.0874226	0.0658268	0.0887778	0.0611594	0.0380987
Hs.512464	0.0119044	0.0691701	0.0546002	0.0239128	0.0522007	0.0844338	0.152126	0.123843	0.11247
Hs.512587	0.00496527	0.00492656	0.00259656	0.00988818	0.0038036	0.0119072	0.00754258	0.00457361	0.00986033
Hs.512599	0.122549	0.218444	0.168386	0.0700596	0.189273	0.195083	0.279151	0.158501	0.172778
Hs.512633	0.0675557	0.0865113	0.0483293	0.0362185	0.0240527	0.0413408	0.0347035	0.00331774	0.0503743
Hs.512636	0.0920196	0.102013	0.16439	0.240866	0.277049	0.158237	0.275842	0.245455	0.540981
Hs.512682	0.0115386	0.0192789	0.0189759	0.019752	0.0139381	0.0297434	0.0246673	0.0219065	0.0409506
Hs.512690	0.258205	0.195593	0.14276	0.2544	0.141645	0.339939	0.155261	0.0590082	0.307535
Hs.512714	0.0228096	0.0333056	0.0584005	0.0282149	0.0462075	0.0301546	0.0133922	0.0148971	0.0393972
Hs.513153	0.0102251	0.0263427	0.0267115	0.0552691	0.0332807	0.0160073	0.0549225	0.0420855	0.0637138
Hs.513457	0.00102368	0.0161239	0.0209383	0.00851101	0.00699184	0.00773722	0.0114611	0.00263406	0.0207264
Hs.513463	0.0370142	0.490713	0.132411	0.398546	0.0652525	0.362418	0.523723	0.194335	0.462737
Hs.513490	0.0138072	0.0375408	0.026058	0.0166393	0.0151059	0.019585	0.028745	0.0185801	0.0220162
Hs.513609	0.0159372	0.184747	0.059094	0.0577985	0.0935658	0.151	0.156727	0.286631	0.190995
Hs.513617	0.0421284	0.040249	0.0775915	0.059986	0.0908143	0.0898756	0.150882	0.117255	0.214134
Hs.513711	0.00162583	0.00479736	0.00482398	0.0057065	0.00350871	0.00709966	0.00766183	0.0047593	0.00741942
Hs.513803	0.00198849	0.0167245	0.0248845	0.0100711	0.00560593	0.00853276	0.0299333	0.0360471	0.0315365
Hs.513829	0.00871098	0.0122091	0.0233081	0.0145434	0.00714601	0.0234181	0.0202791	0.0243824	0.0378869
Hs.513915	0.0239923	0.0262275	0.0423802	0.0227078	0.00864375	0.0270523	0.0255367	0.0455851	0.0382094
Hs.514107	0.0418149	0.0997584	0.11659	0.0557173	0.0384481	0.0386725	0.0115995	0.00789488	0.0128433
Hs.514174	0.0389466	0.074559	0.0422872	0.0390187	0.108095	0.091986	0.151877	0.0999455	0.0695431
Hs.514227	0.0506466	0.0318743	0.0247796	0.022487	0.0212821	0.0239443	0.025198	0.0333635	0.022546
Hs.514289	0.118141	0.0534907	0.0969742	0.0447485	0.122109	0.139959	0.0993294	0.0985331	0.143778
Hs.514292	0.0223714	0.0385802	0.0452423	0.0294561	0.020923	0.103005	0.0998685	0.0643372	0.0390641
Hs.514303	0.0144784	0.0325219	0.0358709	0.0186387	0.0237132	0.0296801	0.0435408	0.0219541	0.0377459
Hs.514451	0.0309312	0.0345576	0.0388678	0.0410305	0.0181195	0.0304946	0.0942525	0.0239705	0.0409911
Hs.514527	0.0273734	0.0969039	0.0797157	0.0512629	0.0468684	0.0889502	0.115189	0.0620651	0.0364273
Hs.514581	0.057184	0.094989	0.0790848	0.0474767	0.0373481	0.0646884	0.0804904	0.0459501	0.0314762
Hs.514681	0.161287	0.404936	0.850592	0.60512	0.655151	0.395909	0.665733	0.485274	0.998798
Hs.514821	0.0137557	0.0263349	0.0183621	0.0188096	0.0393311	0.0667834	0.0426794	0.00566005	0.035508
Hs.515016	0.0165126	0.115719	0.0727758	0.042505	0.080529	0.0769252	0.144417	0.0988559	0.198678
Hs.515122	0.194697	0.487025	0.250569	0.147378	0.510219	0.781885	0.883469	0.67174	0.280413
Hs.515162	0.195065	0.247098	0.265348	0.251622	0.121639	0.145834	0.242371	0.134889	0.192019
Hs.515210	0.0313492	0.0724679	0.0839257	0.0438621	0.0654163	0.0692043	0.121755	0.0782189	0.118246
Hs.515247	0.0973329	0.253946	0.233175	0.10193	0.216862	0.287614	0.419623	0.0816014	0.447433
Hs.515366	0.019046	0.0557762	0.033169	0.0160351	0.0173261	0.0241252	0.055994	0.0301812	0.0115203
Hs.515427	0.0117148	0.0305908	0.0396887	0.0337935	0.0354426	0.0467259	0.0660444	0.0376854	0.0542704
Hs.515835	0.0107015	0.0225985	0.0447504	0.0215804	0.00769648	0.00501818	0.0272133	0.0138244	0.021739
Hs.515840	0.0601954	0.195821	0.180616	0.0797181	0.165271	0.142137	0.161249	0.123542	0.288352
Hs.516157	0.0183558	0.0131816	0.00608095	0.00884189	0.0120187	0.0114307	0.0157519	0.00750745	0.047337
Hs.516176	0.0917655	0.0499869	0.0650342	0.0266136	0.0648961	0.0253048	0.0411697	0.0345552	0.0532994
Hs.516297	0.276059	0.126196	0.120931	0.165402	0.274708	0.177977	0.216564	0.368962	0.159204
Hs.516439	0.0380522	0.0511142	0.0759515	0.058867	0.0075381	0.0708099	0.0737179	0.146659	0.0152872
Hs.516484	0.0307296	0.0385494	0.0510849	0.0813206	0.049468	0.03345	0.0422724	0.0448479	0.0427295
Hs.516494	0.00799663	0.00513163	0.068752	0.0418441	0.0361644	0.0290762	0.0334646	0.0190231	0.00999733
Hs.516656	0.145665	0.0727659	0.0558481	0.0227251	0.115401	0.0526649	0.0257122	0.0386267	0.0960867
Hs.516700	0.0123802	0.0112446	0.0381765	0.0151031	0.0105489	0.00542793	0.023707	0.0104401	0.0357012
Hs.516726	0.0149137	0.0100064	0.0242677	0.0197838	0.0111774	0.0286034	0.013621	0.00773831	0.0150806
Hs.516966	0.00976756	0.0119861	0.0105589	0.0130173	0.0104687	0.00878312	0.018221	0.0174234	0.0183511
Hs.517034	0.0364558	0.0937623	0.0323188	0.0479074	0.0773814	0.0758629	0.102665	0.116156	0.122285
Hs.517070	0.00300982	0.00355846	0.0156858	0.00414005	0.0074853	0.00688706	0.00600807	0.0115309	0.0132373
Hs.517145	0.00697896	0.0177117	0.0153301	0.0138869	0.00552156	0.00649455	0.00714419	0.00301367	0.0155486
Hs.517581	0.0149814	0.0189101	0.0107163	0.03478	0.00900205	0.00890109	0.00618436	0.00788815	0.0098153
Hs.517586	0.0317076	0.0245975	0.0464146	0.0435955	0.0247573	0.00906395	0.0464051	0.00631531	0.0202233
Hs.517729	0.0158742	0.0122334	0.0106617	0.021102	0.024758	0.020482	0.103468	0.022939	0.0155708
Hs.517792	0.0232693	0.00976225	0.0400934	0.049359	0.085273	0.0231253	0.0501109	0.0257959	0.0645693
Hs.517939	0.0462313	0.118177	0.127563	0.144309	0.105283	0.12112	0.231328	0.190941	0.249088
Hs.518198	0.044642	0.0772274	0.0223568	0.0253045	0.0417509	0.0394777	0.0341366	0.0195176	0.0342809
Hs.518267	0.00143457	0.00120022	0.00123438	0.00103669	0.000480674	0.00139879	0.00131689	0.00222108	0.00249183
Hs.518438	0.00501252	0.013821	0.0112609	0.0229656	0.00839934	0.0123539	0.00557395	0.00531395	0.00989334
Hs.518450	0.0154642	0.0484868	0.0642404	0.0337797	0.065372	0.0507763	0.068042	0.034404	0.0793857
Hs.518726	0.0127607	0.109643	0.0524211	0.0585569	0.0302484	0.0102867	0.0541198	0.0628135	0.0831694
Hs.518774	0.0118021	0.0558802	0.0342913	0.035805	0.0114466	0.0299501	0.0332469	0.0240241	0.0461632
Hs.518805	0.00850768	0.0121144	0.0183222	0.00237016	0.00437358	0.00857457	0.0149215	0.00592627	0.0153883
Hs.518808	0.00543754	0.0239586	0.0228413	0.0145396	0.010808	0.00610246	0.0137526	0.0156151	0.0182978
Hs.519033	0.0127197	0.011046	0.0125664	0.00980823	0.0126712	0.0124461	0.00706726	0.0064936	0.00836868
Hs.519057	0.0111193	0.0244338	0.0252891	0.0155785	0.00650014	0.0278086	0.0133068	0.0219522	0.012368
Hs.519385	0.0277883	0.156062	0.102828	0.106998	0.111266	0.138072	0.128791	0.0890888	0.173998
Hs.519469	0.066495	0.0408425	0.0988359	0.0937869	0.0749537	0.0408633	0.0622602	0.0259817	0.126992
Hs.519601	0.0223124	0.0241913	0.0332324	0.00451895	0.110493	0.0771236	0.0263578	0.00702666	0.0309419
Hs.519719	0.0166337	0.0452478	0.0440388	0.0247863	0.0330508	0.0111754	0.112277	3.01e-05	0.0277502
Hs.519880	0.0463899	0.0250742	0.0335626	0.031473	0.0347123	0.0266232	0.027933	0.039254	0.115199
Hs.519909	0.149681	0.1557	0.385269	0.406924	0.291261	0.536718	0.049324	0.0932171	0.219463
Hs.520028	0.0169131	0.0710989	0.0458368	0.0396322	0.0282466	0.0367777	0.0586322	0.0366036	0.0603731
Hs.520048	0.0206831	0.0168486	0.0419595	0.00627552	0.0166814	0.0375899	0.0147538	0.044791	0.0355012
Hs.520140	0.0241496	0.0494515	0.0292791	0.0523342	0.0367005	0.0506313	0.0562783	0.0475997	0.126875
Hs.520205	0.0190554	0.0312427	0.012247	0.0254853	0.029055	0.0131078	0.0310177	0.0212913	0.0268594
Hs.520414	0.0558274	0.19981	0.346417	0.235526	0.251899	0.17795	0.267347	0.174747	0.445052
Hs.520421	0.0110721	0.0182448	0.0313907	0.0156575	0.0127574	0.0216311	0.0105283	0.00860237	0.0111484
Hs.520640	0.0230276	0.0731686	0.0529892	0.0235506	0.0211365	0.0257104	0.027948	0.0145371	0.01623
Hs.520757	0.0639459	0.018222	0.010737	0.0768592	0.0460312	0.0895674	0.0849702	0.0132471	0.100223
Hs.520819	0.02538	0.0221361	0.0286138	0.0301042	0.069513	0.0190923	0.0253449	0.041436	0.054154
Hs.520937	0.0326272	0.014507	0.0328168	0.0223735	0.0319152	0.0378893	0.0128348	0.0110262	0.0240768
Hs.520973	0.00569651	0.00871443	0.00454715	0.00681404	0.00744899	0.00858706	0.00894216	0.00379461	0.00869795
Hs.520989	1.59623	3.70159	0.856521	1.96898	1.2846	0.63534	3.47352	4.7449	3.23838
Hs.521212	0.0811429	0.175743	0.279399	0.0607599	0.129122	0.282329	0.453548	0.273142	0.25381
Hs.521456	0.0228996	0.0434143	0.0756585	0.0583271	0.0717291	0.0508794	0.0495936	0.038334	0.0790024
Hs.521535	0.00325549	0.0269615	0.0136447	0.00948513	0.00996433	0.00482347	0.0049365	0.0153546	0.0170808
Hs.521651	0.0222542	0.0575263	0.0630824	0.0260921	0.072911	0.0543022	0.027824	0.0587375	0.0444179
Hs.522074	0.0705108	0.265027	0.207268	0.195861	0.112989	0.248197	0.425193	0.205889	0.327074
Hs.522356	0.00355252	0.00429807	0.0068466	0.00407696	0.00234605	0.00706492	0.00866862	0.00444028	0.0121422
Hs.522373	0.0200303	0.060847	0.0435969	0.0444312	0.0598648	0.0766658	0.0724181	0.0414786	0.0449316
Hs.522413	0.0119844	0.0926194	0.043218	0.0818368	0.0685972	0.0654899	0.0717629	0.0501584	0.0629155
Hs.522632	0.0114121	0.0895318	0.0563885	0.0548705	0.0632834	0.0542839	0.100188	0.0543801	0.042556
Hs.522666	0.0017894	0.00532435	0.00687979	0.00307323	0.00317492	0.00359607	0.00768787	0.00251602	0.0115291
Hs.522746	0.0574997	0.0547465	0.0471862	0.0466112	0.049529	0.0715063	0.0210735	0.0279519	0.0418294
Hs.522798	0.0325676	0.0772726	0.0798938	0.0275334	0.068891	0.0434888	0.0368456	0.0165269	0.04314
Hs.522818	0.01121	0.0563074	0.0570896	0.0719025	0.0455246	0.12467	0.0557023	0.0338753	0.0867635
Hs.522819	0.0192326	0.0635133	0.0556609	0.047391	0.064913	0.087121	0.0472032	0.0362516	0.0649364
Hs.522891	0.0226288	0.0568523	0.068699	0.0456418	0.100043	0.0527989	0.0685389	0.0948962	0.132421
Hs.523004	0.00846389	0.0536579	0.077868	0.055849	0.0595149	0.0697537	0.15369	0.0991377	0.134722
Hs.523395	0.0548021	0.187171	0.0959056	0.175113	0.115866	0.244892	0.0736871	0.348465	0.288013
Hs.523414	0.236714	0.603025	0.243775	0.420113	0.946913	0.973576	0.690743	0.095826	0.398091
Hs.523443	0.0219501	0.0167628	0.0199822	0.01661	0.0190237	0.0249086	0.0161266	0.0137224	0.0112678
Hs.523500	0.0528241	0.00904855	0.027242	0.0738569	0.0405504	0.0577232	0.0878935	0.0989548	0.113398
Hs.523506	0.0312148	0.0362307	0.0322472	0.0219985	0.0505699	0.0877491	0.0424797	0.0336486	0.0404476
Hs.523680	0.0322773	0.0718462	0.0970243	0.00875144	0.0562846	0.0716268	0.083887	0.0354544	0.0784728
Hs.523718	0.0217798	0.0127856	0.0276687	0.0267098	0.0243269	0.0493631	0.0080692	0.0194862	0.0386449
Hs.523732	0.0521472	0.163847	0.152656	0.231728	0.101891	0.401399	0.0765563	0.160553	0.366119
Hs.523744	0.0635033	0.162216	0.0289743	0.0276623	0.0503577	0.178053	0.220362	0.130591	0.12666
Hs.523836	0.0284076	0.122429	0.089339	0.064667	0.0685443	0.132896	0.151611	0.117088	0.0381074
Hs.523852	0.00440339	0.0055651	0.0153382	0.0108573	0.0129815	0.00772376	0.00804459	0.00649937	0.0173572
Hs.523875	0.0594412	0.0677533	0.0368928	0.0629104	0.0831779	0.0650311	0.190027	0.0837056	0.0970102
Hs.524081	0.00893534	0.0559564	0.0733639	0.0675204	0.0362732	0.04072	0.0640999	0.0608576	0.0766159
Hs.524219	0.0558903	0.0642053	0.0640249	0.0554949	0.0309745	0.0491152	0.0585905	0.0193658	0.0898191
Hs.524278	0.0460208	0.0401616	0.0528573	0.0111724	0.0410892	0.0820636	0.0538922	0.023516	0.0138746
Hs.524368	0.00927827	0.0111028	0.011711	0.0124136	0.00572127	0.00336224	0.00870976	0.00800531	0.0127322
Hs.524418	0.0248186	0.0244564	0.0268219	0.018928	0.0325167	0.0286518	0.0294813	0.0200597	0.0483548
Hs.524430	0.432314	0.159818	0.0486188	0.0556506	0.0359884	0.0239646	0.0198036	0.0198024	0.151557
Hs.524760	0.0364564	0.0459818	0.00714431	0.0327624	0.0163654	0.0408547	0.0225685	0.019828	0.0154785
Hs.524910	0.0349467	0.131223	0.0598247	0.098643	0.053659	0.107418	0.11512	0.0963126	0.0691573
Hs.525324	0.100261	0.346125	0.343745	0.26681	0.339112	0.436776	0.482373	0.215457	0.428428
Hs.525557	0.00328105	0.0102251	0.0260724	0.00575646	0.0153789	0.0136795	0.0193753	0.0139385	0.0209385
Hs.525572	0.0485916	0.0580486	0.0161257	0.0632267	0.0133074	0.0260042	0.0211505	0.0272339	0.0346399
Hs.527778	0.021109	0.0138503	0.0390604	0.0419142	0.0543324	0.0621202	0.0889919	0.0454908	0.0661651
Hs.527971	0.00658863	0.00937999	0.00737144	0.0193279	0.00660143	0.0190575	0.014453	0.0501514	0.026465
Hs.527973	0.0289513	0.0694123	0.077886	0.0315213	0.0815324	0.0817444	0.150629	0.104431	0.151475
Hs.528111	0.0433965	0.131937	0.0236608	0.0205342	0.0203983	0.0787955	0.0635984	0.0204538	0.0119837
Hs.528368	0.014971	0.0330165	0.0137701	0.0165247	0.0282697	0.0264004	0.028439	0.0214735	0.00688394
Hs.528952	0.0222717	0.0436572	0.0727875	0.0468014	0.0546555	0.0655286	0.0849262	0.0463758	0.127743
Hs.529038	0.0390503	0.0338914	0.059942	0.0474455	0.0129197	0.0208317	0.0561435	0.0341397	0.0517007
Hs.529053	0.00103682	0.00650312	0.00860994	0.00710824	0.00273217	0.00594404	0.00413364	0.00396444	0.00992773
Hs.529353	0.00805992	0.0268828	0.0109309	0.0200801	0.0164135	0.0350052	0.0327777	0.0272935	0.0360389
Hs.529517	0.0452188	0.124274	0.0700754	0.00901626	0.0236391	0.0176915	0.102036	0.0349588	0.0329916
Hs.529571	0.00657894	0.0163189	0.0380902	0.0368067	0.0148688	0.02234	0.0389946	0.00652803	0.0253754
Hs.529618	0.00437673	0.00623613	0.0153567	0.0116195	0.0125076	0.00306272	0.00478629	0.00406136	0.0092484
Hs.529862	0.0751248	0.205262	0.365882	0.228727	0.393083	0.133086	0.229903	0.225795	0.625709
Hs.530227	0.0497792	0.191982	0.230606	0.118036	0.169849	0.259398	0.264335	0.202697	0.319199
Hs.530274	0.0311822	0.0490697	0.0189218	0.0474295	0.0130316	0.0279635	0.0186567	0.0317609	0.0470705
Hs.530904	0.105962	0.0310817	0.0237793	0.0700478	0.0202807	0.0570034	0.0583735	0.0465791	0.0274769
Hs.531587	0.0366777	0.0317573	0.0917644	0.0756345	0.0877327	0.0453358	0.0545784	0.0213806	0.12365
Hs.531668	0.0170684	0.0153487	0.0220321	0.0111277	0.0177743	0.0210805	0.0132317	0.00872433	0.0365936
Hs.531682	0.0219105	0.0223368	0.04209	0.00442617	0.00758851	0.0193193	0.0750583	0.0444813	0.0209545
Hs.531704	0.0180422	0.0128021	0.0140258	0.0171219	0.0175777	0.0138733	0.0108227	0.00676542	0.0102034
Hs.532082	0.0536943	0.0336637	0.103318	0.100107	0.123661	0.0408521	0.0933752	0.00795304	0.180565
Hs.532680	0.020409	0.0355292	0.0290638	0.0277191	0.0388184	0.0323989	0.0497955	0.0319695	0.0514734
Hs.532682	0.0811566	0.0231021	0.0701736	0.0493618	0.0211644	0.0111719	0.0574221	0.01523	0.040682
Hs.532803	0.042836	0.10387	0.121326	0.0605792	0.0493088	0.0658162	0.111707	0.0870544	0.109814
Hs.533013	0.00220321	0.00837505	0.0124567	0.0081303	0.00662134	0.00890091	0.0128965	0.0170647	0.0184807
Hs.533050	0.0254593	0.0883044	0.035953	0.0801996	0.0566799	0.0578382	0.0776372	0.0672541	0.0726645
Hs.533258	0.0240346	0.0204876	0.0212566	0.0212177	0.0258066	0.0395756	0.0292787	0.0380272	0.0384431
Hs.533357	0.054421	0.0265541	0.0553708	0.0418653	0.021463	0.0159677	0.0687089	0.0292119	0.0401147
Hs.533432	0.0198646	0.131309	0.056803	0.0567406	0.040108	0.0780883	0.117665	0.0737213	0.114674
Hs.533566	0.888607	0.271244	0.631059	1.285	0.152907	1.04128	0.441001	1.64727	2.03797
Hs.534206	0.0827063	0.0311142	0.0324264	0.0180754	0.00516095	0.0157864	0.0200914	0.0122604	0.0153096
Hs.534293	0.0122312	0.00554021	0.0120209	0.00598923	0.00602376	0.0053457	0.0128909	0.0110792	0.0109985
Hs.534307	0.116881	0.200206	0.11445	0.113735	0.0567524	0.120894	0.127041	0.0709305	0.171765
Hs.534313	0.0535167	0.0243609	0.022769	0.0278855	0.0147855	0.0362283	0.0212946	0.0100675	0.00357335
Hs.534322	0.0232078	0.0188029	0.0136748	0.0317175	0.0192737	0.0102716	0.0170015	0.0112896	0.0380622
Hs.534332	0.0142575	0.0622584	0.0391731	0.0504497	0.0242551	0.0824698	0.082306	0.0957179	0.0490909
Hs.534334	0.0195408	0.0347217	0.0457363	0.0136946	0.0196101	0.0306338	0.0264608	0.0206929	0.0612468
Hs.534404	0.00817133	0.0179684	0.0121506	0.00847224	0.00999225	0.0161514	0.0228153	0.00889767	0.0270657
Hs.534770	0.00953139	0.0112135	0.0135121	0.0157078	0.00832014	0.00916415	0.0115267	0.00698963	0.0159831
Hs.535845	0.0216521	0.0444452	0.024615	0.0198288	0.0293308	0.046119	0.0180559	0.0106454	0.0183747
Hs.535901	0.0382536	0.0527477	0.0580869	0.0394237	0.0469925	0.0206045	0.0571721	0.0368408	0.040803
Hs.536663	0.0278217	0.0950938	0.140118	0.0855207	0.111134	0.134015	0.231625	0.0856117	0.108164
Hs.53973	0.0329561	0.0474603	0.00292643	0.0242157	0.106853	0.0937004	0.109354	0.0418413	0.141668
Hs.544577	0.00309926	0.00795885	0.00393486	0.00328	0.00232497	0.00631477	0.00840332	0.00445176	0.00305623
Hs.54473	0.018035	0.0722799	0.0631231	0.0454174	0.036509	0.045293	0.060325	0.0372606	0.0468046
Hs.546255	0.00203036	0.00716857	0.00292929	0.00333458	0.00122313	0.00221154	0.00134685	0.00087788	0.00268889
Hs.546270	0.0332742	0.0639091	0.0460283	0.0190128	0.0418091	0.0272708	0.0157438	0.00801031	0.0202513
Hs.546294	0.0246666	0.0668687	0.0719128	0.0348029	0.0536688	0.0316913	0.0186376	0.0541976	0.0478438
Hs.546407	0.0292984	0.0308376	0.0849388	0.0672127	0.0929923	0.0331503	0.0545685	0.0189524	0.0994908
Hs.546439	0.0140791	0.0288479	0.0374169	0.11135	0.0153837	0.0717826	0.0688628	0.0130152	0.0686573
Hs.54780	0.0307233	0.0652986	0.102447	0.0678451	0.123754	0.0637466	0.0980478	0.102145	0.134429
Hs.549053	0.0202558	0.218311	0.178778	0.154271	0.189264	0.198664	0.284957	0.157156	0.225061
Hs.551713	0.037847	0.0260759	0.0265496	0.018837	0.0238084	0.0608375	0.0456147	0.00536076	0.0240121
Hs.55279	0.0196977	0.0142331	0.0301894	0.0125741	0.0186377	0.0226955	0.0158244	0.0120343	0.0281507
Hs.553160	0.0281432	0.0205397	0.0329735	0.037809	0.0259309	0.0472297	0.0513352	0.0269399	0.0342817
Hs.554740	0.0152146	0.0152949	0.0140176	0.0273452	0.0669239	0.0100696	0.0490906	0.0244174	0.0360068
Hs.554822	0.010146	0.0199318	0.0204063	0.0392117	0.0279977	0.0209212	0.0191804	0.0241234	0.0349076
Hs.557	0.100864	0.133367	0.103521	0.113868	0.104349	0.192526	0.183766	0.131991	0.288457
Hs.557550	0.0146437	0.0373153	0.0558807	0.0480793	0.0474635	0.0349831	0.048967	0.0399185	0.0810171
Hs.558308	0.0366592	0.0377799	0.0842417	0.0658966	0.0562378	0.074162	0.0494646	0.00897041	0.101283
Hs.558314	0.00159989	0.00286476	0.00651204	0.00722505	0.00281594	0.000822904	0.00163275	0.000771165	0.00385624
Hs.558318	0.0467103	0.0418968	0.0428273	0.024417	0.017045	0.0504296	0.0286348	0.0200328	0.0319591
Hs.558334	0.0551869	0.0546302	0.0459337	0.0542635	0.0428707	0.0307172	0.0505319	0.0226241	0.0950698
Hs.558396	0.00998465	0.0126424	0.0163294	0.00744335	0.00759381	0.00370181	0.00977417	0.00833555	0.0107976
Hs.558950	0.0264463	0.0145597	0.0599176	0.0336624	0.0553484	0.0353007	0.0393888	0.00105047	0.133254
Hs.563344	0.0264087	0.0344274	0.0408567	0.00476718	0.0234387	0.0188555	0.0227821	0.00732156	0.0121982
Hs.567245	0.0721669	0.0367413	0.0377235	0.0612259	0.0133742	0.0356637	0.0294761	0.0263187	0.0330436
Hs.567252	0.04554	0.034146	0.0841927	0.0603425	0.0472339	0.0484398	0.0551582	0.0424236	0.116315
Hs.567280	0.0294013	0.0198759	0.00998312	0.0233528	0.0533644	0.0240369	0.0150277	0.0261887	0.00870162
Hs.567303	0.00730224	0.0144447	0.0366922	0.0205494	0.0308744	0.0184831	0.0211585	0.0181424	0.0237454
Hs.567319	0.0581908	0.0532431	0.174469	0.164721	0.129558	0.100572	0.123956	0.107791	0.140819
Hs.567641	0.0373909	0.0447316	0.0690701	0.0157415	0.0521454	0.039179	0.00998897	0.0116864	0.0309934
Hs.570791	0.12384	0.398134	0.0628374	0.0714113	0.0582051	0.262886	0.307592	0.320326	0.187669
Hs.570855	0.00943729	0.0101045	0.00884757	0.00994154	0.0148436	0.0229322	0.0156302	0.00407307	0.00622655
Hs.571037	0.015579	0.0493326	0.0551377	0.0491627	0.0215387	0.019028	0.0335456	0.0306737	0.0456103
Hs.571841	0.0125723	0.0330373	0.0465601	0.0451583	0.0280851	0.0288563	0.0478826	0.0406457	0.0921649
Hs.573143	0.0433172	0.0362584	0.140134	0.17937	0.0724368	0.063691	0.203383	0.047924	0.18433
Hs.573153	0.00272225	0.00303247	0.00429863	0.00312465	0.00347626	0.00563629	0.00476707	0.00212763	0.00546512
Hs.574026	0.023126	0.113848	0.0233459	0.0337025	0.00421711	0.0411582	0.02513	0.0371876	0.147027
Hs.575083	0.0238944	0.0825452	0.0297152	0.0413832	0.0183989	0.0508197	0.0163569	0.0428768	0.0247071
Hs.575782	0.119691	0.0378409	0.286282	0.320557	0.489866	0.154517	0.271332	0.0424739	0.584379
Hs.581632	0.15759	0.07875	0.225643	0.223526	0.378746	0.101608	0.230281	0.0921745	0.411733
Hs.584801	0.0468989	0.119429	0.0124837	0.0479466	0.0160605	0.0448486	0.0457537	0.0596057	0.045206
Hs.584804	0.0577531	0.030577	0.0368366	0.0354099	0.0142061	0.0643107	0.0126546	0.0509366	0.0390756
Hs.584823	0.0213995	0.0634373	0.0648169	0.0739765	0.0309656	0.0431796	0.100306	0.141286	0.0304229
Hs.584884	0.0266891	0.0724689	0.0901027	0.0692185	0.0712179	0.0580882	0.0846438	0.0715415	0.142021
Hs.585357	0.00353935	0.00441819	0.00328322	0.00218797	0.003586	0.00589032	0.0046361	0.00364381	0.00709007
Hs.58756	0.170093	0.111161	0.181186	0.180644	0.133545	0.0382817	0.0627718	0.146515	0.979383
Hs.588289	0.0278188	0.0109017	0.0137377	0.0129173	0.0175299	0.0363977	0.0450403	0.0255769	0.0340361
Hs.58974	0.0125364	0.0888024	0.0429346	0.0231426	0.0375859	0.0791779	0.0849355	0.0631263	0.0318948
Hs.590872	0.0151747	0.0116427	0.017557	0.0137386	0.0301387	0.0137484	0.0120526	0.00993946	0.0462041
Hs.590892	0.0529915	0.136703	0.0723	0.0165288	0.198302	0.359662	0.266502	0.180475	0.416709
Hs.590921	0.0187578	0.0077243	0.0314203	0.0206629	0.0139076	0.024385	0.0121216	0.00302534	0.0248298
Hs.591148	0.0552966	0.0560465	0.0422892	0.047494	0.0425525	0.0621561	0.0799217	0.0209585	0.0645729
Hs.591159	0.0573204	0.0362299	0.0627117	0.0396718	0.0197531	0.0123017	0.0660809	0.0261666	0.0142589
Hs.591241	0.0527214	0.0411651	0.117385	0.110773	0.117258	0.060854	0.0475069	0.0199572	0.174565
Hs.591251	0.0121131	0.0167674	0.0116356	0.00763872	0.00783173	0.00888298	0.0161775	0.0148714	0.0315897
Hs.591336	0.0566442	0.555951	0.551115	0.154243	0.122437	0.446993	0.620617	0.765927	0.534898
Hs.591346	0.793606	0.185846	0.0865823	0.708862	0.137432	0.0138107	0.030634	0.0197289	0.117599
Hs.59138	0.0180788	0.27474	0.147385	0.191967	0.127867	0.246477	0.333678	0.197018	0.338558
Hs.591382	0.0433	0.097536	0.0970599	0.0950808	0.075514	0.0829213	0.141908	0.0356074	0.187325
Hs.591400	0.0394062	0.0430101	0.0324183	0.0296788	0.030554	0.0480274	0.0780082	0.0505644	0.0786908
Hs.591402	0.0204399	0.0274266	0.0305609	0.021239	0.0388583	0.028643	0.0400646	0.0190123	0.0560728
Hs.591430	0.0642229	0.0564211	0.105741	0.122165	0.209393	0.0197633	0.0788089	0.105368	0.391818
Hs.591484	0.0195285	0.0258205	0.0409208	0.0277422	0.0072516	0.025701	0.0300602	0.0237788	0.0327206
Hs.591486	0.0491617	0.0452141	0.0751093	0.079992	0.0172128	0.037638	0.0424596	0.0253637	0.0392511
Hs.591588	0.010131	0.013667	0.0142589	0.00461919	0.0160353	0.0178277	0.00604829	0.0103919	0.00685154
Hs.591654	0.0392176	0.0573591	0.0219816	0.0375574	0.0322116	0.0670451	0.0853361	0.0204323	0.0259921
Hs.591742	0.0146647	0.0199155	0.0375436	0.0051922	0.00237437	0.00963608	0.0325513	0.0295497	0.0168657
Hs.591802	0.00716156	0.0419203	0.0298213	0.0677219	0.0749517	0.0576043	0.0769211	0.10462	0.0396561
Hs.591834	0.0810252	0.0647232	0.0500439	0.0298891	0.0182079	0.0109765	0.0870105	0.0199805	0.0773291
Hs.591847	0.0366036	0.134053	0.188479	0.0957439	0.181543	0.0771143	0.155144	0.015251	0.231703
Hs.591890	0.0343669	0.0528494	0.0510125	0.0526485	0.0172892	0.0933734	0.0843908	0.0413261	0.0397727
Hs.591928	0.0295392	0.0120735	0.0482654	0.0706956	0.0399873	0.0272223	0.0521816	0.111664	0.0309466
Hs.591940	0.0210257	0.0383647	0.0208913	0.0297215	0.0190148	0.0453898	0.0598445	0.034815	0.052429
Hs.591944	0.0677139	0.0492731	0.0380268	0.0586276	0.0642631	0.0751234	0.130765	0.108735	0.126214
Hs.591945	0.0589144	0.0177062	0.0375295	0.0133328	0.0314601	0.0132041	0.0681656	0.0261342	0.079223
Hs.591969	0.0326402	0.0227314	0.0441976	0.0373101	0.0343719	0.0192463	0.0154311	0.044129	0.0266681
Hs.591980	0.0359915	0.0449738	0.0622319	0.0392575	0.00908772	0.0293664	0.029526	0.021234	0.0711592
Hs.591983	0.105961	0.231915	0.105269	0.100608	0.0395339	0.177583	0.215892	0.103952	0.0610421
Hs.591993	0.102963	0.250104	0.0574199	0.027971	0.150513	0.277324	0.266426	0.125663	0.129468
Hs.592049	0.0194611	0.075779	0.0799808	0.0634262	0.0623215	0.10435	0.159907	0.0793698	0.0511076
Hs.592123	0.0301743	0.0433232	0.042677	0.0192556	0.0592987	0.0469386	0.0751198	0.0338285	0.0486068
Hs.592130	0.0148493	0.0158354	0.0186871	0.0149736	0.0143698	0.028303	0.0276462	0.0116347	0.0359722
Hs.592166	0.0301834	0.0510676	0.0316107	0.0261161	0.0122015	0.0108457	0.0355114	0.0202152	0.0108998
Hs.592227	0.0180013	0.0514082	0.0458024	0.0257651	0.0218747	0.0460298	0.0198482	0.0437616	0.0376988
Hs.592244	0.0807598	0.0342886	0.0507776	0.0413022	0.04158	0.0775054	0.0450921	0.0288487	0.0451217
Hs.592290	0.0711609	0.0711252	0.0269423	0.0808416	0.144878	0.171409	0.34469	0.177093	0.108739
Hs.592317	0.0341782	0.0461232	0.0579168	0.0355591	0.100941	0.0937011	0.0211371	0.0492939	0.0657751
Hs.592324	0.03055	0.0197634	0.0201079	0.0189165	0.0243536	0.042201	0.0401943	0.00723056	0.022441
Hs.592338	0.070919	0.163683	0.240786	0.090314	0.0953396	0.143508	0.108512	0.0299978	0.132739
Hs.592490	0.0794912	0.0761704	0.0272359	0.0681474	0.0111676	0.0427006	0.0402058	0.0486365	0.00904416
Hs.593413	0.00601623	0.00327196	0.002323	0.00328682	0.00188183	0.00118947	0.000940226	0.00160731	0.00345541
Hs.593928	0.00913634	0.0348345	0.031049	0.0249795	0.0279995	0.0356169	0.0726793	0.0762361	0.0558105
Hs.594444	0.0171072	0.015711	0.0143098	0.0218274	0.0278806	0.0321462	0.0567347	0.0254059	0.017243
Hs.594481	0.00489905	0.0146869	0.00903239	0.00537235	0.00425495	0.00660473	0.0117409	0.00132921	0.014571
Hs.597656	0.0241097	0.0331439	0.0718613	0.0626527	0.0918738	0.032096	0.0446722	0.034876	0.0862667
Hs.59889	0.0667568	0.0392513	0.0320751	0.0243717	0.0433371	0.0454194	0.0586567	0.000620108	0.0215487
Hs.602898	0.0319701	0.0799365	0.0587405	0.0651485	0.0551558	0.0593611	0.100233	0.101772	0.122496
Hs.610926	0.0885719	0.102758	0.0798185	0.100568	0.0374894	0.0560418	0.0689615	0.0462584	0.158561
Hs.62192	0.281657	0.0776619	0.0484117	0.2342	0.100116	0.0645515	0.123731	0.0494119	0.0200656
Hs.622865	0.0016148	0.00425919	0.00695133	0.00456315	0.00190486	0.00486567	0.00668687	0.00266711	0.00758532
Hs.624	0.0117817	0.0269097	0.0242203	0.010118	0.00435389	0.00928174	0.00737172	0.01668	0.0184725
Hs.62492	0.0325857	0.0412883	0.0194335	0.0203531	0.083826	0.0788895	0.147983	0.0183255	0.095414
Hs.62880	0.0233841	0.0276036	0.0297502	0.00988942	0.0310521	0.023992	0.0311718	0.00678797	0.0198646
Hs.631513	0.0510898	0.0560048	0.0910582	0.0983449	0.101459	0.0365717	0.0807498	0.0765255	0.124303
Hs.631535	0.0273638	0.0342458	0.0230696	0.0191454	0.0300006	0.0515962	0.0446422	0.0378234	0.0314323
Hs.631546	0.0458874	0.0762086	0.0950405	0.086037	0.158593	0.107886	0.035067	0.0876748	0.116815
Hs.631567	0.0263661	0.10201	0.0514578	0.0390218	0.0107285	0.0462061	0.0724433	0.0430322	0.0575848
Hs.631624	0.0198551	0.0421101	0.0284751	0.0379043	0.0377168	0.0564513	0.0620815	0.0388548	0.0401694
Hs.631659	0.0393258	0.153758	0.074145	0.0549928	0.0517276	0.091886	0.113047	0.0130485	0.1211
Hs.631726	0.0173505	0.0725655	0.00810149	0.027738	0.0695031	0.0452953	0.0149035	0.0199675	0.0213358
Hs.631886	0.0228823	0.0149943	0.0687076	0.0222029	0.149952	0.0665095	0.0721254	0.0434872	0.0766639
Hs.632054	0.0553492	0.0385542	0.0240847	0.0517377	0.0610307	0.0446503	0.0317589	0.0370004	0.0419035
Hs.632099	0.0784276	0.147222	0.0781266	0.173583	0.066803	0.0596304	0.0937673	0.0679458	0.0388251
Hs.632119	0.0385547	0.0245964	0.0892648	0.0685151	0.0585653	0.0908689	0.100821	0.0132584	0.0239293
Hs.632137	0.0231951	0.0331109	0.0436967	0.0307591	0.016372	0.026217	0.0384395	0.0148375	0.0370028
Hs.632144	0.0412954	0.0313047	0.0292122	0.140958	0.0845839	0.136972	0.038064	0.0171519	0.0178658
Hs.632179	0.0138155	0.0170788	0.0105209	0.0211543	0.00602116	0.0163484	0.0262807	0.0150526	0.0350241
Hs.632188	0.0362945	0.0356442	0.0379168	0.0469642	0.0337111	0.0282586	0.0419079	0.0179995	0.0612189
Hs.632221	0.0499436	0.0401897	0.0552327	0.104959	0.053502	0.0332639	0.0540945	0.0333408	0.093079
Hs.632235	0.0209441	0.0235286	0.0114243	0.0253412	0.0533818	0.0238492	0.0389932	0.0888787	0.0437008
Hs.632324	0.0408728	0.0584361	0.0475979	0.0648699	0.0278467	0.0662194	0.0249244	0.0141177	0.0493485
Hs.632402	0.036034	0.0306782	0.04239	0.01797	0.0565853	0.0119165	0.0238046	0.0119498	0.0231956
Hs.632436	0.0698582	0.129029	0.0292273	0.0609994	0.0448556	0.0852168	0.0360815	0.125937	0.0294711
Hs.632466	0.481113	0.856672	0.176034	0.245102	1.40306	0.693276	1.37174	0.772826	0.800917
Hs.632540	0.0653642	0.301656	0.184466	0.151649	0.0529464	0.141781	0.199975	0.156405	0.265938
Hs.632642	0.0387792	0.065602	0.0229275	0.057687	0.0356701	0.0710637	0.0192586	0.0674426	0.0650805
Hs.632702	0.0362321	0.0737989	0.0442281	0.0634547	0.0513844	0.121714	0.0800081	0.0341289	0.0541691
Hs.632733	0.0439331	0.183973	0.294859	0.0918513	0.264249	0.334636	0.498611	0.405252	0.685927
Hs.632790	0.0540581	0.0585504	0.0903755	0.0763606	0.0535319	0.0627727	0.0624162	0.0707987	0.064943
Hs.633003	0.00123176	0.00222418	0.0038724	0.00136902	0.00168461	0.00200833	0.00365432	0.00248274	0.00443549
Hs.634632	0.0110691	0.0547337	0.0791642	0.0343504	0.0618455	0.0507327	0.0677798	0.0384074	0.125596
Hs.6347	0.0479011	0.127382	0.126805	0.0601192	0.287384	0.132764	0.145802	0.120971	0.338751
Hs.63489	0.00906695	0.00942551	0.00916855	0.00909459	0.00599709	0.0118663	0.0135853	0.00564646	0.0137287
Hs.635441	0.0428385	0.0220945	0.0335264	0.0580703	0.0393221	0.0202312	0.0163125	0.0162893	0.0271417
Hs.64016	0.012463	0.0229627	0.0324817	0.00948946	0.0123341	0.0243894	0.0189116	0.0177378	0.00811997
Hs.642813	0.010231	0.0286083	0.0126356	0.0173967	0.0124055	0.0167347	0.0340814	0.0266791	0.00889412
Hs.642938	0.000806119	0.000948166	0.00285635	0.00124999	0.000218925	0.00103981	0.00174637	0.000607905	0.00251546
Hs.642966	0.0533176	0.147206	0.226736	0.153415	0.142241	0.0928153	0.152749	0.090872	0.272311
Hs.643030	0.0439404	0.199628	0.0913224	0.113589	0.0880076	0.191193	0.313055	0.112849	0.0323799
Hs.643357	0.424739	0.276858	0.235309	0.55021	0.148605	0.169916	0.132811	0.139842	0.0940913
Hs.643447	0.00466227	0.00526724	0.00957848	0.004508	0.002882	0.00386596	0.00786289	0.00634955	0.00913012
Hs.643487	0.0266145	0.0773132	0.0590859	0.0682812	0.0424875	0.0832959	0.141487	0.129751	0.162789
Hs.644610	0.0550426	0.06332	0.0526151	0.0752673	0.078661	0.157345	0.162737	0.207217	0.242838
Hs.644653	0.0439108	0.0404648	0.12039	0.0893691	0.108894	0.0389775	0.0835061	0.0364924	0.179951
Hs.645224	0.0625123	0.0448928	0.0860924	0.0789851	0.0520157	0.106654	0.0579124	0.0281669	0.0990104
Hs.645227	0.0106002	0.0135753	0.0139209	0.00999929	0.0189989	0.0172318	0.0323049	0.0156108	0.0328267
Hs.645228	0.0129995	0.0166238	0.0440824	0.0210861	0.107248	0.0173071	0.0373623	0.010124	0.0133763
Hs.645535	0.0435015	0.0353364	0.0704874	0.0191259	0.017836	0.0478545	0.0635799	0.011212	0.121502
Hs.646	0.052236	0.0103205	0.0168425	0.0468693	0.0865049	0.0804533	0.0566053	0.0472535	0.111054
Hs.647047	0.07373	0.0413142	0.0304835	0.0433349	0.0183251	0.0566025	0.0341898	0.00451367	0.0327691
Hs.647055	0.00811408	0.0205546	0.027685	0.0149093	0.0130031	0.00785624	0.023854	0.0146811	0.0281519
Hs.647061	0.0800161	0.177704	0.204009	0.184248	0.401129	0.300778	0.386168	0.3573	0.516234
Hs.647078	0.0671739	0.234182	0.197303	0.0764291	0.183591	0.244102	0.295633	0.250283	0.232542
Hs.647092	0.0170403	0.0367268	0.0414153	0.0114342	0.0284201	0.0157614	0.0395825	0.0342335	0.0223949
Hs.647156	0.0658726	0.030752	0.0896922	0.0307799	0.0931282	0.0575431	0.0506525	0.0819897	0.0426272
Hs.647371	0.00132475	0.00420167	0.00443047	0.00264917	0.004173	0.00409522	0.00595047	0.0031352	0.00290372
Hs.647389	0.0279161	0.0426383	0.0484213	0.090025	0.0517302	0.104075	0.0628956	0.00464989	0.0768312
Hs.647419	0.0143396	0.0395619	0.0308725	0.0155337	0.0174109	0.0191336	0.0399973	0.00857413	0.0498444
Hs.647430	0.0360512	0.0365503	0.0446632	0.0296159	0.0975298	0.0430683	0.0601827	0.0660461	0.00879997
Hs.647623	0.0140337	0.0239101	0.029712	0.00704236	0.0337771	0.0295979	0.0178686	0.0293211	0.0296679
Hs.648256	0.0659733	0.0402162	0.0808246	0.0386957	0.0253885	0.062438	0.0836531	0.0293288	0.075495
Hs.648635	0.0413535	0.114711	0.0415404	0.0265328	0.0362877	0.0955838	0.0958257	0.0822347	0.0250457
Hs.649191	0.023392	0.0104809	0.0181019	0.0112139	0.0318516	0.022974	0.0243574	0.00633081	0.0499706
Hs.652262	0.0509289	0.0289773	0.0272955	0.0149249	0.0622878	0.0171245	0.0477275	0.0220438	0.0340388
Hs.652366	0.0529108	0.017436	0.0187581	0.0465838	0.02649	0.0284251	0.0241218	0.0498746	0.0518317
Hs.653135	0.0189035	0.0404617	0.0631125	0.0534988	0.0568885	0.050932	0.0743671	0.0808494	0.0960256
Hs.65425	0.0185825	0.0718907	0.0523485	0.126913	0.166195	0.093293	0.2568	0.127689	0.0454328
Hs.654360	0.0945856	0.224966	0.0678086	0.316682	0.0387548	0.0902019	0.138358	0.0489367	0.0942802
Hs.654368	0.0348657	0.0405818	0.0433296	0.0116736	0.0184237	0.0214475	0.0221651	0.0415456	0.0336301
Hs.654370	0.00320336	0.00317304	0.0221729	0.0171215	0.0232553	0.0294247	0.0156553	0.00835323	0.0184523
Hs.654380	0.0369477	0.0589012	0.0288484	0.0410841	0.0762748	0.0237345	0.0384336	0.0248259	0.0437435
Hs.654385	0.0327972	0.0596382	0.030655	0.0291109	0.0590169	0.0699334	0.0926561	0.0689659	0.117458
Hs.654390	0.0224915	0.0177844	0.0245693	0.0281608	0.0257192	0.0293054	0.0234791	0.0202768	0.028591
Hs.654391	0.024504	0.0230252	0.0395101	0.0279319	0.0331249	0.0500233	0.0498635	0.0281439	0.0332725
Hs.654393	0.0175312	0.123046	0.109533	0.0707718	0.0720893	0.121267	0.112135	0.0657328	0.0763744
Hs.654394	0.0420562	0.038912	0.0341881	0.030018	0.026463	0.0392596	0.0393636	0.0330393	0.0502046
Hs.654399	0.0315856	0.0161987	0.041221	0.0460992	0.0433492	0.0407396	0.0548629	0.0461707	0.0234094
Hs.654403	0.0294759	0.0414555	0.0424111	0.0788784	0.0820587	0.0123015	0.122868	0.00560413	0.036928
Hs.654408	0.0197712	0.0346031	0.0345224	0.0311524	0.0488444	0.0255277	0.0330023	0.0296463	0.11116
Hs.654410	0.0313163	0.0311024	0.027721	0.0285799	0.0179335	0.0373429	0.0170302	0.022059	0.030835
Hs.654419	0.0686977	0.0365422	0.0392183	0.0223975	0.0253459	0.0658274	0.0434997	0.179075	0.146816
Hs.654424	0.0113248	0.044307	0.00831294	0.024586	0.00624053	0.010299	0.00988214	0.0061787	0.0214845
Hs.654430	0.0150911	0.0292571	0.0291762	0.0504598	0.0421965	0.0528887	0.0770386	0.031647	0.0506577
Hs.654433	0.0289441	0.0403168	0.0243288	0.0150056	0.0474525	0.0489561	0.0212253	0.026912	0.0108826
Hs.654434	0.0473433	0.00761261	0.0288392	0.0208561	0.0655546	0.066276	0.0389442	0.0355136	0.102818
Hs.654436	0.0660787	0.0231149	0.0709196	0.0578435	0.0387853	0.0634019	0.0493879	0.017037	0.0373317
Hs.654439	0.00321006	0.00623062	0.0041333	0.00773308	0.00585433	0.00460934	0.00703097	0.00226549	0.0121553
Hs.654444	0.00356388	0.00721667	0.00525607	0.00402354	0.00523807	0.00433364	0.0139172	0.0105027	0.0069214
Hs.654446	0.00254416	0.0222853	0.00931739	0.00965854	0.00497884	0.00807345	0.0120359	0.0122216	0.0254674
Hs.654447	0.0205222	0.0285992	0.0802981	0.0202022	0.0783451	0.0459597	0.0978179	0.101514	0.0720202
Hs.654450	0.0174381	0.0373858	0.0104415	0.0366991	0.0536366	0.0708369	0.0460397	0.0474197	0.0341548
Hs.654455	0.0553971	0.0212363	0.072693	0.0924348	0.0421095	0.0206121	0.0304114	0.0724013	0.130857
Hs.654458	0.119193	0.0494739	0.0394312	0.0953081	0.057063	0.0349915	0.0326141	0.020616	0.0315845
Hs.654464	0.0436544	0.0247735	0.0576695	0.0717871	0.0127047	0.0648645	0.0809743	0.0678186	0.0314383
Hs.654465	0.0551969	0.21917	0.297018	0.276589	0.175194	0.177115	0.252456	0.279936	0.332673
Hs.654466	0.0722827	0.0914945	0.116748	0.0686571	0.209513	0.141721	0.159131	0.111311	0.252986
Hs.654472	0.014635	0.029267	0.0259037	0.02483	0.0106304	0.0242058	0.0105586	0.00293625	0.0312628
Hs.654473	0.0181444	0.0426885	0.0283945	0.0190937	0.0132607	0.0241482	0.0249004	0.0123026	0.0371308
Hs.654479	0.0322324	0.0647874	0.0510484	0.0590009	0.0261506	0.0162596	0.0459138	0.0233001	0.0440308
Hs.654481	0.0151372	0.01546	0.0184631	0.0159443	0.0224622	0.0198731	0.019441	0.0160838	0.0194111
Hs.654484	0.245532	0.202741	0.15131	0.17777	0.137887	0.0829864	0.443651	0.273647	0.421635
Hs.654490	0.0101851	0.0168877	0.0517671	0.0337512	0.0334721	0.0491938	0.0844466	0.03822	0.0484407
Hs.654491	0.0416777	0.117489	0.262113	0.111833	0.183233	0.156372	0.166317	0.211289	0.332553
Hs.654510	0.0104151	0.0275697	0.0588551	0.0331249	0.0186476	0.0616601	0.0324299	0.0364012	0.0411235
Hs.654514	0.0100532	0.00687674	0.0107328	0.00977176	0.0075431	0.0094819	0.0110042	0.0040994	0.0083245
Hs.654515	0.0815415	0.0178217	0.0902799	0.0603301	0.0189632	0.070349	0.0578455	0.00146761	0.0810612
Hs.654522	0.0145237	0.0395931	0.0477504	0.030086	0.0188343	0.0396562	0.0598995	0.0512088	0.0247505
Hs.654532	0.0607821	0.0336829	0.0135439	0.0285202	0.0392553	0.0330533	0.014798	0.00958308	0.0613405
Hs.654533	0.0326926	0.0679178	0.110428	0.0877912	0.126293	0.0700321	0.0995636	0.0614754	0.185353
Hs.654536	0.00564338	0.0113887	0.0237277	0.00447914	0.0137391	0.0234194	0.0357645	0.0186072	0.0529268
Hs.654537	0.0356434	0.0278374	0.104493	0.0227081	0.032441	0.0989335	0.0422467	0.0725792	0.0842876
Hs.654541	0.0291569	0.116777	0.0463933	0.0810541	0.126117	0.10626	0.197586	0.159244	0.233974
Hs.654542	0.0208389	0.0248592	0.0362316	0.0323296	0.0259127	0.0114423	0.0273899	0.0978892	0.0208953
Hs.654544	0.048396	0.083828	0.0351742	0.0552318	0.052566	0.135943	0.0789165	0.0454154	0.124021
Hs.654583	0.0284133	0.122442	0.0996338	0.080924	0.123577	0.124207	0.181606	0.115606	0.233992
Hs.654585	0.0230553	0.0467049	0.06527	0.0685414	0.0534024	0.122437	0.0973647	0.0787734	0.111313
Hs.654591	0.0904139	0.196898	0.0929826	0.123678	0.132413	0.109527	0.111021	0.104392	0.327084
Hs.654600	0.00633319	0.00348749	0.0156816	0.014341	0.013798	0.0057835	0.0108675	0.00647828	0.0197367
Hs.654758	0.0611957	0.177042	0.189786	0.136483	0.154447	0.191328	0.265013	0.0920021	0.271947
Hs.654798	0.0217183	0.0454376	0.0578285	0.0122461	0.0336029	0.0202963	0.040893	0.0545716	0.0346136
Hs.654894	0.00807321	0.0199546	0.0210918	0.0138536	0.0182749	0.0138636	0.0189973	0.013312	0.0258406
Hs.654978	0.0103759	0.0134174	0.00910225	0.0232157	0.0268952	0.0134509	0.0153194	0.0272352	0.0126728
Hs.654981	0.0248643	0.0195758	0.0528847	0.0518756	0.0893277	0.0472113	0.0414867	0.0434881	0.126892
Hs.655148	0.0196592	0.0120586	0.0464642	0.0221332	0.0680823	0.0586632	0.0393697	0.00244614	0.025682
Hs.655151	0.0341995	0.0430888	0.0252803	0.0273274	0.0154904	0.0355305	0.0304464	0.0340859	0.0551309
Hs.655160	0.0349566	0.021274	0.0210066	0.0321106	0.021114	0.0173182	0.0189988	0.0395776	0.0506517
Hs.655195	0.000684585	0.00164479	0.00637862	0.00129655	0.00196157	0.003377	0.00375374	0.00199208	0.00600397
Hs.655199	0.00829522	0.0342624	0.0223336	0.0205835	0.01903	0.05765	0.0509854	0.025896	0.034616
Hs.655207	0.00125348	0.00159628	0.00279223	0.00171893	0.00239681	0.0021721	0.002145	0.00243031	0.00387089
Hs.655218	0.0312313	0.014573	0.0194213	0.0289882	0.0105651	0.0668316	0.00957006	0.00245566	0.0138678
Hs.655222	0.0930488	0.139362	0.0650278	0.0799265	0.0384086	0.0704099	0.0985893	0.0780331	0.114301
Hs.655229	0.119313	0.0824129	0.0335086	0.0546501	0.0838433	0.0390222	0.0499861	0.0714477	0.117643
Hs.655331	0.0690915	0.038497	0.0656093	0.0278346	0.0578852	0.021714	0.02326	0.0222381	0.0226545
Hs.655334	0.04461	0.0437188	0.0618377	0.0258104	0.0594216	0.0757848	0.0977227	0.068544	0.183459
Hs.655423	0.233134	0.0446857	0.0514778	0.128362	0.0292857	0.0946315	0.0736151	0.0363109	0.0213024
Hs.655516	0.0203193	0.0144335	0.033819	0.0581142	0.0177205	0.0591226	0.0226541	0.0117692	0.00618626
Hs.655782	0.00830201	0.0542437	0.0925453	0.059108	0.0774755	0.0447168	0.0416356	0.0147122	0.0997598
Hs.655801	0.0207782	0.0284147	0.0250988	0.0135852	0.0352713	0.0397456	0.0226012	0.0303236	0.044617
Hs.655983	0.00522649	0.0101679	0.0101142	0.0122032	0.0242192	0.0196527	0.0227576	0.0164686	0.0367456
Hs.656047	0.0718883	0.11603	0.0926162	0.114412	0.017561	0.0383879	0.0233573	0.0100057	0.0802653
Hs.656214	0.0157326	0.0527241	0.0805724	0.0764531	0.19563	0.167168	0.172962	0.172958	0.0854416
Hs.656261	0.128462	0.0224512	0.0512786	0.0757761	0.0358024	0.0321012	0.0344559	0.0382238	0.102363
Hs.656544	0.0916399	0.0405813	0.0112932	0.0120443	0.00933321	0.032209	0.0112628	0.00552922	0.00728257
Hs.656567	0.0108494	0.0112216	0.0222653	0.0147578	0.0182347	0.0253118	0.0256088	0.0240476	0.0350073
Hs.656937	0.0473402	0.0100911	0.0277412	0.048698	0.0534935	0.0506368	0.0621747	0.0334701	0.0824564
Hs.656980	0.337727	1.29576	0.939402	0.459304	0.779637	0.573014	0.832112	0.248626	1.20471
Hs.65734	0.0264685	0.110053	0.137882	0.100012	0.00626441	0.0867133	0.162155	0.115933	0.0901014
Hs.657724	0.241091	0.278876	0.514119	0.365178	0.385551	0.053571	0.15555	0.150579	0.400984
Hs.657729	0.0565065	0.046605	0.082945	0.0330284	0.0280832	0.281034	0.124179	0.000529741	0.0804106
Hs.658120	0.0471844	0.0413584	0.1032	0.0370794	0.0571086	0.081963	0.073678	0.0458851	0.184441
Hs.658439	0.0257703	0.0205645	0.0625932	0.04752	0.0346592	0.0373559	0.0413333	0.0829166	0.0834345
Hs.658487	0.0669316	0.0465116	0.0625847	0.0428749	0.0351263	0.0820344	0.0621256	0.0212785	0.064568
Hs.658534	0.0420255	0.154131	0.0220966	0.0356732	0.0214014	0.085522	0.0361078	0.074352	0.0532464
Hs.658573	0.10941	0.147822	0.180594	0.119892	0.0959115	0.249498	0.192214	0.0855074	0.362828
Hs.658850	0.0263685	0.0152538	0.0158192	0.0184519	0.022963	0.0161141	0.0286605	0.0211913	0.032641
Hs.659337	0.0137254	0.027021	0.0199932	0.0286907	0.0648952	0.080886	0.0509755	0.0259846	0.0614241
Hs.659516	0.0325491	0.0639691	0.0105029	0.0217542	0.0573609	0.0218028	0.0319818	0.022967	0.0725492
Hs.659889	0.0246597	0.0254859	0.0836677	0.0637137	0.0112643	0.0608565	0.0270211	0.00225714	0.0329881
Hs.660362	0.0528918	0.0999977	0.0265332	0.0420665	0.0295034	0.0437295	0.0269106	0.00830245	0.0214144
Hs.661017	0.0606551	0.0349572	0.031012	0.045535	0.0684785	0.0840427	0.0405081	0.0182136	0.0560278
Hs.661104	0.0711535	0.0713414	0.0779926	0.0329765	0.0825461	0.0395087	0.143487	0.0530161	0.0413716
Hs.661219	0.0135482	0.0350222	0.0494277	0.0332592	0.0262859	0.0320603	0.0117179	0.0254296	0.038036
Hs.661360	0.0152908	0.0369018	0.0211311	0.0156304	0.014192	0.0177373	0.0210801	0.0110533	0.0100246
Hs.662050	0.01902	0.0264836	0.0236082	0.00799251	0.0436867	0.0327616	0.0190725	0.0140732	0.0232289
Hs.663679	0.0436113	0.0199981	0.0221941	0.0479789	0.0294854	0.113905	0.0832862	0.0151457	0.115816
Hs.664011	0.0271297	0.0272929	0.0557594	0.0104719	0.0165953	0.0380786	0.00706284	0.0241328	0.0559561
Hs.664500	0.0200049	0.0271593	0.018591	0.0297988	0.0189303	0.0369961	0.0512294	0.0278108	0.0275269
Hs.664706	0.0247169	0.0261772	0.0175734	0.0145448	0.0269558	0.0270218	0.0158837	0.0153022	0.03446
Hs.66744	0.0771754	0.0933003	0.0810023	0.146714	0.128822	0.0905544	0.115466	0.047821	0.139868
Hs.667720	0.0351064	0.0206785	0.0617419	0.0277238	0.0239951	0.0439484	0.0664841	0.0216837	0.145977
Hs.670866	0.0503764	0.0453533	0.0206374	0.0321232	0.0577599	0.0524698	0.0430421	0.0263895	0.0655965
Hs.673	0.0393467	0.0324539	0.0276572	0.0583261	0.0674998	0.0253468	0.0326545	0.00824556	0.0626883
Hs.673853	0.046	0.0877306	0.0301694	0.145851	0.154131	0.259439	0.179127	0.0194694	0.170462
Hs.67397	0.0198363	0.0491483	0.0785638	0.0203852	0.0204325	0.0442994	0.0272667	0.00429367	0.0112043
Hs.674	0.0909402	0.0708667	0.0343464	0.0163712	0.0606128	0.103971	0.0853253	0.0139143	0.0167375
Hs.675513	0.00626889	0.0403457	0.0167804	0.00284099	0.0351476	0.000975964	0.0505534	0.0651587	0.00263582
Hs.677398	0.683244	1.31305	0.450347	0.575591	0.367132	1.60867	0.395765	0.2234	1.01818
Hs.678914	0.0587953	0.0353749	0.0286112	0.0254309	0.49065	0.0774769	0.0521354	0.00542127	0.0512233
Hs.679163	0.0165362	0.0228006	0.0611975	0.0179668	0.0147943	0.0241975	0.0320921	0.00792754	0.0270455
Hs.684503	0.0575944	0.102212	0.06068	0.0224743	0.0659063	0.100452	0.120779	0.0096897	0.044645
Hs.684904	0.0391582	0.0439556	0.0584721	0.0474053	0.0481686	0.059877	0.0351857	0.0520791	0.0805496
Hs.68864	0.0895291	0.0611292	0.100872	0.0430862	0.0367214	0.0870579	0.0877095	0.0612565	0.00613159
Hs.68876	0.0185025	0.0508564	0.0312822	0.0222063	0.0290915	0.0543509	0.0406946	0.0305187	0.030047
Hs.68879	0.0474578	0.454182	0.374183	0.458456	0.518876	0.439521	0.690054	0.628345	0.872673
Hs.69089	0.0471358	0.0583751	0.043694	0.0719537	0.0628916	0.0884372	0.107597	0.0858357	0.0749593
Hs.694	0.0563071	0.0647763	0.0220005	0.0320497	0.213971	0.0264062	0.00942002	0.0086909	0.0306013
Hs.695914	0.0380546	0.0668734	0.0453448	0.0185561	0.0583133	0.115765	0.0618451	0.0663884	0.121006
Hs.696032	0.0351796	0.181165	0.0902039	0.0710959	0.177335	0.226805	0.265948	0.211994	0.309143
Hs.697294	0.0127633	0.0132445	0.0155244	0.0122946	0.00719025	0.0143847	0.0148687	0.0106598	0.0106058
Hs.699154	0.00657632	0.00892652	0.00625659	0.00538782	0.00529915	0.00915477	0.0123625	0.0111524	0.00925303
Hs.699280	0.00962828	0.0294317	0.00862898	0.011041	0.0465603	0.028808	0.0237368	0.0150478	0.0256992
Hs.699288	0.148579	0.0802681	0.044147	0.104276	0.0913057	0.152229	0.15713	0.0217525	0.0166901
Hs.699463	0.0304733	0.0594761	0.0198632	0.0224484	0.0176393	0.0214055	0.0331851	0.0228346	0.0596125
Hs.7195	0.0292384	0.0370003	0.0541801	0.0246914	0.0225038	0.0257969	0.0441151	0.0225829	0.0598326
Hs.72879	0.00296604	0.0337308	0.00405415	0.00865126	0.00047085	0.00774517	0.00255551	0.0071209	0.00309636
Hs.72885	0.0421202	0.0347733	0.0982744	0.0453488	0.0116006	0.0439605	0.0296573	0.0312979	0.124323
Hs.72901	0.0316104	0.0098321	0.0299853	0.0141542	0.0113698	0.0219518	0.00997645	0.0239823	0.0159468
Hs.72912	0.0559266	0.105729	0.0392663	0.04697	0.0738386	0.144557	0.0996119	0.130321	0.0328406
Hs.72938	0.0564823	0.0180831	0.054769	0.0176788	0.0311143	0.0307914	0.0279343	0.0506354	0.0334476
Hs.7303	0.0206208	0.035215	0.0161817	0.0348562	0.0340767	0.0227398	0.0191514	0.0197518	0.0517553
Hs.73090	0.0128176	0.0175769	0.0225018	0.00706347	0.01455	0.0195641	0.0246094	0.00536021	0.0217302
Hs.73172	0.00721193	0.017368	0.0480759	0.015655	0.0177009	0.0126694	0.0465886	0.00124581	0.0213108
Hs.73527	0.0127028	0.0320933	0.0296406	0.014796	0.0287135	0.036657	0.0524532	0.0311156	0.0426195
Hs.73722	0.0381097	0.071834	0.0677052	0.0329559	0.0367969	0.0705028	0.0986843	0.0691603	0.104553
Hs.73793	0.00248337	0.00586278	0.00649716	0.00367526	0.00234463	0.00451199	0.00610165	0.0048421	0.00787328
Hs.73800	0.0306518	0.0474899	0.0327227	0.0530924	0.019781	0.0501373	0.0711625	0.0331356	0.0157974
Hs.73809	0.0301749	0.0468806	0.0320812	0.00860571	0.0242447	0.0289863	0.036149	0.00416283	0.0401322
Hs.73849	0.0117133	0.0146804	0.0250089	0.00853228	0.0101666	0.0174106	0.0126282	0.00847177	0.0275976
Hs.73853	0.0160984	0.00386977	0.00240406	0.0155345	0.0164196	0.0271976	0.0246773	0.0112121	0.0359636
Hs.73893	0.0904436	0.161306	0.131995	0.111352	0.0638055	0.21383	0.115973	0.0980146	0.166472
Hs.73917	0.0129964	0.0107791	0.0145341	0.0121854	0.0118767	0.0202385	0.0129903	0.0172202	0.0174379
Hs.73962	0.0167781	0.0242118	0.0421521	0.0128224	0.0217041	0.0758414	0.0711626	0.0219327	0.0289605
Hs.74034	0.0039064	0.00112337	0.00229161	0.00589842	0.000807878	0.00192525	0.00122558	0.00463612	0.0023972
Hs.74124	0.0287878	0.026926	0.129727	0.0503132	0.0425844	0.0186902	0.0884549	0.081167	0.0516708
Hs.744	0.0613679	0.0795103	0.0211512	0.063257	0.0362808	0.019174	0.0245363	0.00200918	0.0444101
Hs.74471	0.0248873	0.0153579	0.00563755	0.0260344	0.0236677	0.0172695	0.0140857	0.00855095	0.0176803
Hs.74615	0.0339375	0.0994652	0.124851	0.213066	0.204535	0.195361	0.396715	0.550567	0.534182
Hs.74647	0.0144084	0.0115125	0.0144704	0.0109339	0.0137587	0.0161185	0.0204228	0.0102365	0.0136937
Hs.75093	0.0253688	0.084475	0.0763891	0.065795	0.122716	0.117004	0.228528	0.125267	0.0957134
Hs.75160	0.0669743	0.349779	0.423773	0.153406	0.284688	0.247272	0.387391	0.150575	0.481943
Hs.75189	0.0202962	0.0670883	0.078986	0.0314438	0.0784293	0.0535387	0.0934273	0.0427292	0.0541785
Hs.75262	0.0199835	0.138771	0.208982	0.101683	0.0953055	0.14187	0.377865	0.564897	0.591847
Hs.75294	0.0186034	0.0128458	0.0760881	0.0682533	0.0733931	0.0986702	0.0675235	0.0371049	0.0279366
Hs.75527	0.00881271	0.0820397	0.0650509	0.0395226	0.0428901	0.0865681	0.0945235	0.0571777	0.126248
Hs.75599	0.0141991	0.00981071	0.0177098	0.0119027	0.00517256	0.0144115	0.0066802	0.00998654	0.0122069
Hs.75615	0.0144998	0.0332347	0.0427132	0.0040932	0.0133147	0.0289556	0.0100969	0.0222895	0.0437458
Hs.75640	0.0243265	0.0836633	0.0303712	0.0480202	0.13372	0.0357835	0.0123999	0.0172721	0.0159354
Hs.75643	0.00633584	0.00731013	0.00393203	0.00471829	0.00077027	0.00561078	0.00226829	0.0137031	0.00736157
Hs.75703	0.030723	0.043979	0.0399827	0.0508786	0.0666143	0.0925544	0.0722665	0.102809	0.0930347
Hs.75799	0.0277905	0.058056	0.0337614	0.0645011	0.0223726	0.0708223	0.0746197	0.0172855	0.100501
Hs.75969	0.0528451	0.0192278	0.0983322	0.184747	0.31154	0.140234	0.163921	0.184841	0.164389
Hs.76111	0.0176576	0.0433125	0.0248746	0.0475944	0.0538941	0.050335	0.0592482	0.0338849	0.0477593
Hs.7636	0.0546998	0.0197134	0.0500101	0.023672	0.0320258	0.0147411	0.03407	0.0303667	0.0136289
Hs.765	0.00627103	0.0284674	0.0347896	0.00301704	0.0180975	0.0584305	0.00421601	0.0173898	0.0258474
Hs.76686	0.032678	0.0954329	0.0831778	0.0355982	0.0608803	0.0694388	0.0884312	0.0513704	0.0528335
Hs.767	0.0325601	0.042816	0.0232118	0.0333453	0.03644	0.0250664	0.0443375	0.0350194	0.0609525
Hs.76753	0.0303639	0.213306	0.345014	0.236568	0.317487	0.300114	0.587012	0.285199	0.44971
Hs.76884	0.00709719	0.0141667	0.0136212	0.0177248	0.0143662	0.00538558	0.0191473	0.0221102	0.0217062
Hs.77269	0.0132912	0.0494199	0.042105	0.054539	0.0399085	0.0577568	0.0428975	0.0416959	0.0730141
Hs.77274	0.00108176	0.00287638	0.00247005	0.00134557	0.00103119	0.00129819	0.00246204	0.00185922	0.00265654
Hs.77318	0.0309596	0.0469058	0.134382	0.142161	0.147072	0.0597391	0.131196	0.122714	0.176532
Hs.77367	0.0433398	0.0409798	0.0339811	0.0658754	0.0191113	0.154861	0.0524486	0.0042131	0.0217036
Hs.77741	0.0230009	0.0280157	0.0289334	0.00533933	0.0323812	0.00864232	0.0132693	0.0507863	0.0156693
Hs.77854	0.0140163	0.0256884	0.013738	0.00813501	0.0118897	0.00135072	0.00414621	0.00113977	0.0125917
Hs.78619	0.0546056	0.228106	0.258258	0.293578	0.203704	0.239724	0.371549	0.120563	0.261576
Hs.78769	0.0477061	0.0659218	0.098419	0.0385437	0.0506409	0.076634	0.103982	0.0502385	0.0746554
Hs.78771	0.003544	0.00942634	0.0108498	0.00506724	0.00421717	0.0059179	0.00828054	0.00556795	0.00672243
Hs.78888	0.0360351	0.055209	0.0488756	0.0650057	0.0473756	0.0158946	0.0209763	0.0267272	0.0309184
Hs.789	0.00527171	0.0113931	0.0163045	0.0082873	0.00758555	0.00493068	0.00551938	0.00388229	0.0125781
Hs.78960	0.52952	0.224409	0.19072	0.0928067	0.22067	0.455917	0.702751	1.26868	0.257812
Hs.78977	0.0219144	0.0296794	0.0191739	0.0139313	0.00962387	0.016075	0.00729121	0.00828661	0.0122119
Hs.79101	0.114269	0.129786	0.379635	0.347046	0.419319	0.275761	0.379771	0.0820702	0.781575
Hs.79334	0.0359469	0.12512	0.0648423	0.0788467	0.0082574	0.0689935	0.120405	0.0987535	0.0735915
Hs.799	0.0260512	0.0154758	0.0376575	0.0307479	0.0252232	0.0208466	0.0350711	0.0185126	0.0261222
Hs.80395	0.00246984	0.00538047	0.00512784	0.0051632	0.0050067	0.00528199	0.00410241	0.0182102	0.0087676
Hs.80409	0.034381	0.0259843	0.0742855	0.0595843	0.0565502	0.00317025	0.0075784	0.0156302	0.0677254
Hs.80485	0.0125914	0.017243	0.0122541	0.012951	0.0121174	0.0161414	0.0198751	0.020486	0.0202498
Hs.80642	0.0290099	0.046253	0.0219841	0.0131513	0.0157563	0.0594398	0.0249965	0.0628057	0.0288148
Hs.80658	0.0178015	0.0588413	0.0645598	0.0819543	0.0624129	0.102266	0.144862	0.0711166	0.0618497
Hs.80776	0.0222443	0.0559962	0.0577651	0.0487629	0.0748916	0.0780432	0.173746	0.0859943	0.170209
Hs.80828	0.0290684	0.0229704	0.0226294	0.0492542	0.0491177	0.0331642	0.086857	0.229821	0.0799101
Hs.81134	0.0167269	0.0408974	0.0573213	0.0211358	0.0411377	0.0314022	0.0386026	0.0390592	0.0461873
Hs.81170	0.00813551	0.0374668	0.0316562	0.0450872	0.0375912	0.0300928	0.0446424	0.0327687	0.037831
Hs.81328	0.0280831	0.173347	0.14058	0.0981359	0.126564	0.151263	0.170122	0.137496	0.256288
Hs.81564	0.0227996	0.0358924	0.0570715	0.0323659	0.0290025	0.0609763	0.0325012	0.0190591	0.0557351
Hs.81791	0.00622506	0.0127347	0.00622135	0.00747225	0.00183863	0.0109117	0.0057918	0.00402811	0.00723537
Hs.82028	0.0992205	0.0864509	0.0554856	0.0643809	0.0775337	0.0941922	0.12422	0.061773	0.0239717
Hs.82071	0.065365	0.120318	0.113226	0.116687	0.099019	0.0853372	0.127692	0.0608588	0.301748
Hs.82116	0.0392034	0.0229804	0.0256429	0.0275176	0.0534552	0.031997	0.0215719	0.00727218	0.0350111
Hs.82327	0.000895462	0.0866125	0.084235	0.0423224	0.0634112	0.0918284	0.101739	0.0745303	0.0529956
Hs.82609	0.00282304	0.0103573	0.00603875	0.00694559	0.00575034	0.00733098	0.00691077	0.00536567	0.00731202
Hs.82916	0.0218412	0.127681	0.0864872	0.0478962	0.0691424	0.0558469	0.0663691	0.0975956	0.165786
Hs.82961	0.0174772	0.0177558	0.00966305	0.0093139	0.0110986	0.0257493	0.00961448	0.0100986	0.0277143
Hs.82963	0.0496754	0.0764486	0.0908465	0.0362103	0.0825938	0.0506769	0.0115298	0.0432075	0.066971
Hs.83077	0.00998217	0.00943082	0.016039	0.00923684	0.00792763	0.0109665	0.00957344	0.0100753	0.0103694
Hs.83169	0.0296707	0.0710255	0.0599505	0.0520898	0.0146973	0.0401266	0.0502539	0.0271996	0.00555242
Hs.83190	0.034092	0.0362079	0.0922152	0.0261483	0.117664	0.0373339	0.109172	0.0274633	0.110687
Hs.8375	0.0611639	0.0987405	0.0443021	0.072624	0.110297	0.114664	0.175352	0.112907	0.137822
Hs.839	0.0223966	0.0799791	0.0257106	0.00665378	0.0267544	0.0450421	0.0330556	0.0407702	0.0215198
Hs.845	0.0201323	0.0238758	0.0738765	0.0200432	0.0453978	0.0941996	0.113803	0.0225764	0.193692
Hs.85258	0.0863819	0.0395277	0.0320421	0.0319136	0.0131145	0.0440104	0.0483178	0.00340343	0.0148696
Hs.856	0.0177958	0.00771435	0.0107011	0.0135434	0.0103355	0.012232	0.0116067	0.0122137	0.0124261
Hs.86154	0.00375221	0.0177461	0.0180284	0.0446167	0.00481753	0.0125533	0.0164596	0.0252653	0.00531462
Hs.86368	0.0185426	0.0217554	0.0170271	0.0346164	0.082293	0.0357923	0.0359379	0.0108912	0.0255456
Hs.87202	0.0325149	0.0141847	0.0529389	0.0415973	0.0367241	0.0399427	0.026113	0.0155375	0.0543871
Hs.87968	0.027684	0.0710308	0.0226265	0.0293574	0.0541866	0.0226731	0.0305076	0.0575912	0.0177627
Hs.88013	0.0211076	0.100535	0.0639982	0.0151845	0.00126677	0.0586261	0.00985364	0.0248443	0.0481847
Hs.8821	0.00228026	0.0502359	0.0350527	0.0170853	0.00246914	0.0613472	0.0255133	0.0241353	0.0543573
Hs.88218	0.0273421	0.0170551	0.066854	0.0267552	0.0503568	0.0379449	0.020842	0.0209767	0.00953502
Hs.88556	0.0121903	0.0175325	0.0304606	0.00902019	0.0182632	0.0102283	0.0137299	0.00701065	0.0358718
Hs.8867	0.162773	0.0268789	0.0222768	0.087559	0.0219055	0.0162577	0.0157389	0.0116403	0.0498653
Hs.889	0.0323359	0.0346611	0.0393768	0.0126571	0.0423375	0.0277123	0.0444551	0.0688906	0.0435786
Hs.89499	0.0149781	0.0252841	0.021614	0.0399172	0.0287733	0.0194453	0.0397642	0.0424173	0.0271754
Hs.89538	0.0311798	0.0551599	0.0622346	0.0261247	0.0239778	0.0242679	0.0392287	0.0517993	0.0379945
Hs.89575	0.0475843	0.0682919	0.048072	0.0322473	0.0414996	0.0876949	0.0698185	0.0302235	0.102557
Hs.89584	0.0439275	0.0331758	0.0315822	0.0253915	0.034264	0.0329187	0.0666635	0.0320135	0.0711828
Hs.89603	0.00362424	0.0120083	0.0257631	0.00819164	0.00885416	0.00584853	0.0244854	0.0102211	0.0364363
Hs.89648	0.0588366	0.11253	0.0417586	0.0668338	0.0419357	0.0677325	0.0355566	0.131955	0.12632
Hs.89649	0.0322181	0.0209337	0.0249832	0.0259975	0.047457	0.0368579	0.0482165	0.0576843	0.0582279
Hs.89663	0.00665221	0.0157419	0.0341168	0.0169278	0.0289385	0.0135143	0.0206771	0.0106816	0.0134697
Hs.89679	0.0101051	0.0138244	0.0129631	0.0155433	0.0154766	0.0197692	0.0144222	0.00994243	0.0136167
Hs.89690	0.0103931	0.0376436	0.0326797	0.0215051	0.0112964	0.0354523	0.0243564	0.0270824	0.0280494
Hs.897	0.0276994	0.0651076	0.0349425	0.0275512	0.139694	0.11445	0.103388	0.0636563	0.00507109
Hs.89890	0.018806	0.126574	0.165859	0.0717598	0.0948755	0.149251	0.172237	0.0963633	0.0848795
Hs.90791	0.00986604	0.0406201	0.0630013	0.0200922	0.0566648	0.00759948	0.0221006	0.0275434	0.0373592
Hs.93177	0.0282238	0.0309195	0.0149304	0.0602336	0.0757093	0.0581429	0.0292075	0.0110176	0.028537
Hs.93485	0.0105157	0.0439529	0.069977	0.0657271	0.0347713	0.0399055	0.0171651	0.026596	0.0248437
Hs.936	0.0461015	0.0270432	0.0329372	0.0335937	0.0245919	0.0341021	0.0293993	0.0319561	0.0365491
Hs.93907	0.00996424	0.0712031	0.0636038	0.0341898	0.0245006	0.0410131	0.0826369	0.0540905	0.0227905
Hs.94107	0.0470052	0.0232989	0.0348221	0.0291002	0.0261364	0.0324863	0.0519254	0.0717672	0.0734105
Hs.94367	0.0158396	0.0276861	0.0193958	0.0244375	0.0183336	0.0425095	0.038107	0.0159067	0.039462
Hs.95008	0.036715	0.107253	0.107681	0.112006	0.0443306	0.08766	0.0721895	0.0100883	0.10127
Hs.95120	0.0131323	0.0383271	0.031461	0.0087958	0.0385068	0.0897603	0.0346109	0.0490795	0.0543639
Hs.952	0.0662286	0.0397252	0.0870232	0.123718	0.0291199	0.0417928	0.0723513	0.00204417	0.0347894
Hs.95577	0.0551103	0.106948	0.0268397	0.0644861	0.0800308	0.113529	0.14542	0.0950204	0.100193
Hs.95990	0.00664593	0.0875415	0.0563504	0.051977	0.0392911	0.134865	0.0895531	0.000535624	0.0231565
Hs.96	0.00758766	0.0114669	0.0183146	0.00665126	0.00710157	0.0045574	0.00694375	0.00299937	0.0117932
Hs.9731	0.0202761	0.032605	0.0304384	0.0137596	0.0294948	0.0431684	0.039719	0.0210884	0.0491863
Hs.98255	0.0332014	0.142768	0.126858	0.0476662	0.211927	0.220125	0.327834	0.107138	0.357732
Hs.98586	0.00760833	0.00659875	0.0354524	0.0190627	0.0744913	0.0853603	0.0316217	0.0266864	0.0684301
Hs.98788	0.0298585	0.0181602	0.0382567	0.0131303	0.0132159	0.0239587	0.0137818	0.0208077	0.0262751
Hs.99348	0.0151922	0.0777684	0.0350808	0.0459952	0.0329775	0.0574139	0.0495215	0.0747197	0.0275064
Hs.997	0.0382343	0.0323136	0.0283903	0.0279479	0.0349935	0.0737189	0.0721167	0.0435362	0.0163971
Hs.99863	0.0157795	0.0691968	0.0744645	0.0239693	0.0262881	0.0677482	0.0407203	0.061329	0.0498172
Hs.99884	0.0706599	0.0925278	0.0301854	0.00957406	0.00327696	0.0623602	0.0556957	0.0932958	0.047314
Hs.99992	0.041778	0.0181051	0.0235114	0.041132	0.0747593	0.0753756	0.0415655	0.0773606	0.00460103
